# Supplementary material for: Transcriptomics and Metabolomics Identify Drug Resistance of Dormant Cell in Colorectal Cancer
Source: Front Pharmacol. 2022 Apr 8;13:879751. doi: 10.3389/fphar.2022.879751 (PMC9024109; doi:10.3389/fphar.2022.879751)
Supplement: Supplementary file 1 [file Table1.xlsx]

## Sheet: TCGA-COAD clinical data
Samples	Group	Sex	Age	Stage	T	N	M	OS	OS_days	PFS	PFS_days
TCGA-3L-AA1B	2	FEMALE	61	Stage I	T2	N0	M0	0	475	0	475
TCGA-4N-A93T	1	MALE	67	Stage IIIB	T4a	N1b	M0	0	146	0	146
TCGA-4T-AA8H	1	FEMALE	42	Stage IIA	T3	N0	MX	0	385	0	385
TCGA-5M-AAT4	1	MALE	74	Stage IV	T3	N0	M1b	1	49	0	49
TCGA-5M-AAT6	2	FEMALE	40	Stage IV	T4a	N2b	M1a	1	290	1	219
TCGA-5M-AATE	1	MALE	76	Stage IIA	T3	N0	M0	0	1200	1	810
TCGA-A6-2671	1	MALE	85	Stage IV	T3	N2	M1	1	1331	1	535
TCGA-A6-2672	1	FEMALE	82	Stage IIIB	T3	N1	M0	0	1419	0	1419
TCGA-A6-2674	2	MALE	71	Stage IV	T3	N2	M1	0	1331	1	735
TCGA-A6-2675	2	MALE	78	Stage IIA	T3	N0	MX	0	1321	0	1321
TCGA-A6-2676	1	FEMALE	75	Stage IIB	T4	N0	M0	1	1305	0	1305
TCGA-A6-2677	1	FEMALE	68	Stage IIIC	T3	N2	M0	1	740	0	740
TCGA-A6-2678	1	FEMALE	43	Stage IIIB	T3	N1	M0	0	1286	0	1286
TCGA-A6-2679	1	FEMALE	73	Stage IIB	T3	N0		0	1366	0	1366
TCGA-A6-2680	1	FEMALE	72	Stage II	T3	N0	M0	0	1068	0	1068
TCGA-A6-2681	1	FEMALE	73	Stage IIA	T3	N0	M0	0	1387	1	1150
TCGA-A6-2682	1	MALE	70	Stage IV	T4b	N1	M1	1	424	1	381
TCGA-A6-2683	1	FEMALE	57	Stage IV	T4	N0	M1	1	504	1	300
TCGA-A6-2684	1	FEMALE	75	Stage I	T2	N0	M0	0	1127	1	976
TCGA-A6-2685	2	FEMALE	48	Stage IIA	T3	N0	M0	0	1133	1	948
TCGA-A6-2686	1	FEMALE	81	Stage IIA	T3	N0	M0	1	1126	0	1126
TCGA-A6-3807	1	FEMALE	53	Stage IIIC	T3	N2	M0	0	1054	0	1054
TCGA-A6-3808	1	MALE	73	Stage IIA	T3	N0	M0	0	1014	0	1014
TCGA-A6-3809	1	FEMALE	71	Stage IIB	T4	N0	M0	0	996	0	996
TCGA-A6-3810	2	MALE	62	Stage IIA	T3	N0	M0	0	1111	0	1111
TCGA-A6-4105	2	MALE	79	Stage IIA	T3	N0	M0	1	442	1	364
TCGA-A6-4107	1	FEMALE	57	Stage IIIB	T3	N1b	M0	0	987	0	987
TCGA-A6-5656	1	MALE	74	Stage I	T2	N0	M0	0	1001	0	1001
TCGA-A6-5657	2	MALE	65	Stage IIIB	T3	N1	M0	0	962	0	962
TCGA-A6-5659	2	MALE	82	Stage I	T2	N0	M0	0	926	0	926
TCGA-A6-5660	1	MALE	73	Stage IIIC	T3	N2b	M0	0	888	0	888
TCGA-A6-5661	1	FEMALE	80	Stage IIA	T3	N0	M0	0	1020	0	1020
TCGA-A6-5662	2	MALE	46	Stage IVA	T3	N2	M1	0	718	1	495
TCGA-A6-5664	2	MALE	80	Stage IIIC	T4a	N2a	MX	0	672	1	183
TCGA-A6-5665	1	FEMALE	84	Stage IIA	T3	N0	M0	0	671	1	529
TCGA-A6-5666	1	MALE	78	Stage IIC	T4b	N0	M0	0	995	1	509
TCGA-A6-5667	2	FEMALE	40	Stage IIIB	T3	N1a	MX	0	887	0	887
TCGA-A6-6137	1	MALE	55	Stage IIIB	T3	N1c	M0	0	824	0	824
TCGA-A6-6138	1	MALE	61	Stage I	T2	N0	M0	0	685	0	685
TCGA-A6-6140	1	MALE	62	Stage IIA	T3	N0	M0	0	734	0	734
TCGA-A6-6141	1	MALE	31	Stage IIA	T3	N0	M0	0	255	0	255
TCGA-A6-6142	1	FEMALE	56	Stage IVA	T3	N1a	M1a	0	763	1	654
TCGA-A6-6648	2	MALE	56	Stage IVA	T3	N0	M1a	0	766	1	686
TCGA-A6-6649	2	MALE	66	Stage IIIB	T3	N1b	M0	0	735	0	735
TCGA-A6-6650	2	FEMALE	69	Stage IIA	T3	N0	M0	0	627	0	627
TCGA-A6-6651	2	FEMALE	55	Stage IIIB	T3	N1b	MX	0	662	0	662
TCGA-A6-6652	1	MALE	59	Stage IVA	T3	N0	M1	0	751	0	751
TCGA-A6-6653	1	MALE	82	Stage I	T2	N0	M0	0	742	0	742
TCGA-A6-6654	2	FEMALE	65	Stage IIIB	T3	N1	M0	0	726	0	726
TCGA-A6-6780	1	MALE	74	Stage IIA	T3	N0	MX	0	612	0	612
TCGA-A6-6781	2	MALE	43	Stage IIIC	T4b	N1b	MX	0	598	0	598
TCGA-A6-6782	2	MALE	82	Stage IIB	T4a	N0	MX	0	617	0	617
TCGA-A6-A565	2	FEMALE	34	Stage IIIC	T3	N2	MX	1	494	1	301
TCGA-A6-A566	1	FEMALE	55	Stage IIIB	T4	N1	M0	1	758	1	257
TCGA-A6-A567	1	MALE	56	Stage IV	T3	N1	M1	1	1881	1	612
TCGA-A6-A56B	1	MALE	57	Stage IIIB	T3	N1	M0	1	1711	1	1678
TCGA-A6-A5ZU	1	MALE	59	Stage IIIB	T3	N1	M0	0	293	0	293
TCGA-AA-3488	1	MALE	58	Stage IV	T3	N2	M1	1	153	0	153
TCGA-AA-3489	2	MALE	75	Stage II	T3	N0	M0	1	214	0	214
TCGA-AA-3492	1	FEMALE	90	Stage II	T3	N0	M0	1	1	0	1
TCGA-AA-3494	1	MALE	55	Stage IV	T3	N0	M1	0	31	0	31
TCGA-AA-3495	1	MALE	79	Stage I	T2	N0	M0	0	1127	0	1127
TCGA-AA-3496	2	FEMALE	83	Stage II	T3	N0	M0	0	31	0	31
TCGA-AA-3502	1	MALE	73	Stage I	T2	N0	M0	0	1065	0	1065
TCGA-AA-3506	1	MALE	77	Stage I	T2	N0	M0	0	1765	0	1765
TCGA-AA-3509	1	FEMALE	54	Stage II	T3	N0	M0	0	1915	0	1915
TCGA-AA-3510	1	MALE	70	Stage II	T3	N0	M0	0	1946	0	1946
TCGA-AA-3511	2	MALE	64	Stage II	T4	N0	M0	0	212	1	59
TCGA-AA-3514	1	FEMALE	81	Stage I	T2	N0	M0	0	31	0	31
TCGA-AA-3516	1	FEMALE	74	Stage III	T3	N2	M0	1	396	0	396
TCGA-AA-3517	1	MALE	60	Stage IIA	T3	N0	M0	0	1186	1	821
TCGA-AA-3518	1	FEMALE	81	Stage IIA	T3	N0	M0	0	31	0	31
TCGA-AA-3519	1	MALE	63	Stage III	T3	N1	M0	0	276	0	276
TCGA-AA-3520	1	FEMALE	86	Stage II	T3	N0	M0	0	731	0	731
TCGA-AA-3521	1	MALE	87	Stage II	T3	N0	M0	NA	NA	0	NA
TCGA-AA-3522	1	MALE	67	Stage IIA	T3	N0	M0	0	1127	0	1127
TCGA-AA-3524	1	MALE	85	Stage II	T3	N0	M0	0	1096	0	1096
TCGA-AA-3525	1	MALE	90	Stage IIIB	T3	N1	M0	0	1	0	1
TCGA-AA-3526	1	MALE	57	Stage I	T2	N0	M0	0	580	0	580
TCGA-AA-3527	1	FEMALE	90	Stage IIA	T3	N0	M0	0	0	0	0
TCGA-AA-3529	1	FEMALE	78	Stage IIIC	T3	N2	M0	1	0	0	0
TCGA-AA-3530	1	MALE	80	Stage I	T2	N0	M0	0	580	0	580
TCGA-AA-3531	1	FEMALE	75	Stage IIA	T3	N0	M0	0	1035	0	1035
TCGA-AA-3532	1	MALE	63	Stage IIA	T3	N0	M0	0	882	0	882
TCGA-AA-3534	1	FEMALE	78	Stage IIA	T3	N0	M0	0	882	0	882
TCGA-AA-3538	1	FEMALE	54	Stage I	T2	N0	M0	0	791	0	791
TCGA-AA-3542	1	MALE	69	Stage IIIC	T3	N2	M0	0	395	0	395
TCGA-AA-3543	1	MALE	84	Stage I	T2	N0	M0	0	30	0	30
TCGA-AA-3544	1	MALE	68	Stage I	T2	N0	M0	0	426	0	426
TCGA-AA-3548	1	FEMALE	71	Stage IIIC	T3	N2	M0	0	1034	0	1034
TCGA-AA-3549	1	MALE	69	Stage I	T2	N0	M0	0	639	0	639
TCGA-AA-3552	1	MALE	85	Stage IIIC	T3	N2	M0	1	396	1	122
TCGA-AA-3553	1	FEMALE	61	Stage I	T2	N0	M0	0	730	0	730
TCGA-AA-3554	1	FEMALE	62	Stage IIA	T3	N0	M0	0	546	0	546
TCGA-AA-3555	1	FEMALE	81	Stage IIA	T3	N0	M0	0	911	1	91
TCGA-AA-3556	1	MALE	78	Stage I	T2	N0	M0	0	700	0	700
TCGA-AA-3560	1	FEMALE	72	Stage IIIC	T3	N2	M0	0	608	0	608
TCGA-AA-3561	1	MALE	72	Stage IIA	T3	N0	M0	0	424	0	424
TCGA-AA-3562	1	MALE	82	Stage IIIC	T3	N2	M0	0	608	0	608
TCGA-AA-3655	1	MALE	68	Stage II	T3	N0	M0	0	1856	0	1856
TCGA-AA-3660	1	FEMALE	51	Stage II	T3	N0	M0	0	2375	0	2375
TCGA-AA-3662	2	FEMALE	80	Stage IV	T4	N2	M1	0	184	0	184
TCGA-AA-3663	1	MALE	42	Stage II	T3	N0	M0	0	212	0	212
TCGA-AA-3664	1	FEMALE	74	Stage II	T3	N0	M0	0	1643	0	1643
TCGA-AA-3666	1	MALE	68	Stage III	T3	N1	M0	1	61	0	61
TCGA-AA-3667	1	FEMALE	36	Stage I	T2	N0	M0	0	426	0	426
TCGA-AA-3672	1	FEMALE	90	Stage III	T3	N1	M0	0	0	0	0
TCGA-AA-3673	1	FEMALE	53	Stage II	T3	N0	M0	0	1522	0	1522
TCGA-AA-3675	1	MALE	84	Stage II	T3	N0	M0	0	1431	0	1431
TCGA-AA-3678	1	FEMALE	60	Stage III	T2	N1	M0	0	1430	0	1430
TCGA-AA-3679	1	MALE	59	Stage IV	T3	N2	M1	0	457	0	457
TCGA-AA-3680	1	FEMALE	67	Stage IV	T4	N2	M1	1	335	0	335
TCGA-AA-3681	1	FEMALE	77	Stage III	T3	N1	M0	0	182	0	182
TCGA-AA-3684	2	FEMALE	65	Stage IV	T4	N2	M1	0	0	0	0
TCGA-AA-3685	1	MALE	69	Stage II	T3	N0	M0	0	1127	0	1127
TCGA-AA-3688	1	MALE	80	Stage IV	T3	N1	M1	0	578	0	578
TCGA-AA-3692	1	FEMALE	47	Stage IV	T3	N2	M1	1	1095	1	396
TCGA-AA-3693	1	FEMALE	77	Stage IV	T4	N1	M1	0	0	0	0
TCGA-AA-3696	1	FEMALE	75	Stage IV	T3	N1	M1	1	153	0	153
TCGA-AA-3697	1	MALE	77	Stage II	T3	N0	M0	0	2587	0	2587
TCGA-AA-3710	1	FEMALE	80	Stage IIA	T3	N0	M0	0	821	0	821
TCGA-AA-3712	1	MALE	65	Stage III	T3	N2	M0	0	0	0	0
TCGA-AA-3713	2	MALE	68	Stage IV	T3	N0	M1	0	579	0	579
TCGA-AA-3715	1	MALE	77	Stage II	T3	N0	M0	1	579	1	153
TCGA-AA-3811	1	FEMALE	84	Stage III	T3	N2	M0	1	306	0	306
TCGA-AA-3812	1	FEMALE	82	Stage IIA	T3	N0	M0	0	1066	1	762
TCGA-AA-3814	2	FEMALE	85	Stage IIA	T3	N0	M0	0	0	0	0
TCGA-AA-3815	1	FEMALE	65	Stage IIA	T3	N0	M0	0	1005	0	1005
TCGA-AA-3818	1	FEMALE	78	Stage IIA	T3	N0	M0	1	30	0	30
TCGA-AA-3819	1	FEMALE	41	Stage IIA	T3	N0	M0	0	761	0	761
TCGA-AA-3821	1	FEMALE	81	Stage I	T2	N0	M0	0	31	0	31
TCGA-AA-3831	1	MALE	66	Stage IIA	T3	N0	M0	0	547	0	547
TCGA-AA-3833	1	FEMALE	63	Stage IIA	T3	N0	M0	0	485	0	485
TCGA-AA-3837	1	MALE	67	Stage IIA	T3	N0	M0	0	1186	0	1186
TCGA-AA-3841	1	MALE	66	Stage IIA	T3	N0	M0	0	1124	0	1124
TCGA-AA-3842	1	MALE	51	Stage IIIA	T2	N1	M0	0	1126	1	396
TCGA-AA-3844	1	FEMALE	78	Stage IIIC	T3	N2	M0	0	454	1	365
TCGA-AA-3845	1	FEMALE	86	Stage IIA	T3	N0	M0	1	0	0	0
TCGA-AA-3846	1	FEMALE	74	Stage IIA	T3	N0	M0	0	518	0	518
TCGA-AA-3848	1	FEMALE	82	Stage IIIC	T3	N2	M0	1	306	0	306
TCGA-AA-3850	1	MALE	74	Stage I	T2	N0	M0	1	0	0	0
TCGA-AA-3851	1	MALE	74	Stage IIA	T3	N0	M0	0	1006	0	1006
TCGA-AA-3852	1	MALE	88	Stage IIA	T3	N0	M0	1	0	0	0
TCGA-AA-3854	1	FEMALE	71	Stage I	T2	N0	M0	0	1096	0	1096
TCGA-AA-3855	1	MALE	72	Stage I	T2	N0	M0	0	975	0	975
TCGA-AA-3856	1	MALE	59	Stage IIA	T3	N0	M0	0	30	0	30
TCGA-AA-3858	1	MALE	67	Stage I	T2	N0	M0	0	945	0	945
TCGA-AA-3860	1	FEMALE	53	Stage IIIB	T3	N1	M0	0	945	0	945
TCGA-AA-3861	1	MALE	72	Stage IIA	T3	N0	M0	0	914	0	914
TCGA-AA-3862	1	MALE	82	Stage IIA	T3	N0	M0	0	914	0	914
TCGA-AA-3864	1	MALE	71	Stage II	T3	N0	M0	0	1612	0	1612
TCGA-AA-3866	1	FEMALE	78	Stage I	T2	N0	M0	0	518	0	518
TCGA-AA-3867	1	MALE	74	Stage IV	T3	N2	M1	0	731	1	394
TCGA-AA-3869	1	MALE	76	Stage IV	T4	N2	M1	1	822	0	822
TCGA-AA-3870	1	FEMALE	71	Stage IV	T3	N2	M1	0	912	0	912
TCGA-AA-3872	2	MALE	45	Stage IV	T4	N2	M1	0	0	0	0
TCGA-AA-3875	1	FEMALE	78	Stage I	T1	N0	M0	0	549	0	549
TCGA-AA-3877	1	FEMALE	83	Stage I	T1	N0	M0	0	943	0	943
TCGA-AA-3930	1	MALE	66	Stage IV	T3	N2	M1	1	61	0	61
TCGA-AA-3939	1	MALE	83	Stage IIA	T3	N0	M0	0	395	0	395
TCGA-AA-3941	1	FEMALE	84	Stage IVA	T4	N1b	M1a	0	730	0	730
TCGA-AA-3947	1	FEMALE	60	Stage IIB	T4	N0	M0	0	1004	0	1004
TCGA-AA-3949	1	FEMALE	87	Stage IIIB	T3	N1	M0	0	791	0	791
TCGA-AA-3950	1	FEMALE	79	Stage IIA	T3	N0	M0	0	730	0	730
TCGA-AA-3952	1	MALE	68	Stage IIIC	T3	N2	M0	1	61	0	61
TCGA-AA-3955	1	MALE	38	Stage IIIB	T2	N2a	M0	0	638	0	638
TCGA-AA-3956	1	MALE	65	Stage IIA	T3	N0	M0	0	1035	0	1035
TCGA-AA-3966	2	FEMALE	89	Stage IIA	T3	N0	M0	0	61	0	61
TCGA-AA-3968	1	FEMALE	55	Stage I	T2	N0	M0	0	669	0	669
TCGA-AA-3970	1	MALE	65	Stage IIA	T3	N0	M0	0	1096	0	1096
TCGA-AA-3971	1	MALE	58	Stage III	T3	N1	M0	0	489	0	489
TCGA-AA-3972	1	MALE	72	Stage IV	T3	N1	M1	0	1551	1	1216
TCGA-AA-3973	1	MALE	69	Stage IV	T4	N1	M1	0	397	0	397
TCGA-AA-3975	1	MALE	80	Stage I	T2	N0	M0	0	1036	0	1036
TCGA-AA-3976	1	MALE	70	Stage IIIA	T2	N1	M0	0	791	0	791
TCGA-AA-3977	1	MALE	65		T2	N0		0	761	0	761
TCGA-AA-3979	1	MALE	84	Stage IIA	T3	N0	M0	0	730	0	730
TCGA-AA-3980	1	FEMALE	89	Stage I	T2	N0	M0	0	242	0	242
TCGA-AA-3982	1	MALE	75	Stage IIIB	T3	N1	M0	0	822	0	822
TCGA-AA-3984	1	FEMALE	61	Stage IIA	T3	N0	M0	0	0	0	0
TCGA-AA-3986	1	MALE	73	Stage I	T2	N0	M0	0	580	0	580
TCGA-AA-3989	1	MALE	84	Stage IV	T3	N2	M1	1	242	0	242
TCGA-AA-3994	1	MALE	69	Stage IIIB	T3	N1	M0	0	822	0	822
TCGA-AA-A004	1	MALE	76	Stage IIA	T3	N0	M0	0	424	0	424
TCGA-AA-A00A	1	MALE	80	Stage IIA	T3	N0	M0	0	1157	0	1157
TCGA-AA-A00D	1	MALE	70	Stage I	T2	N0	M0	0	578	0	578
TCGA-AA-A00E	1	MALE	65	Stage IIA	T3	N0	M0	0	913	0	913
TCGA-AA-A00F	1	MALE	66	Stage IIIC	T3	N2	M0	0	1035	0	1035
TCGA-AA-A00J	1	MALE	80	Stage IIIB	T4	N1	M0	0	549	0	549
TCGA-AA-A00K	1	MALE	79	Stage IIA	T3	N0	M0	0	549	0	549
TCGA-AA-A00L	1	MALE	66	Stage IIA	T3	N0	M0	0	1157	0	1157
TCGA-AA-A00N	2	MALE	75	Stage IIB	T4	N0	M0	1	122	0	122
TCGA-AA-A00O	1	FEMALE	83	Stage IIIC	T3	N2	M0	0	822	0	822
TCGA-AA-A00Q	1	FEMALE	66	Stage IIIB	T4	N1	M0	0	1278	0	1278
TCGA-AA-A00R	1	FEMALE	64	Stage I	T2	N0	M0	0	30	0	30
TCGA-AA-A00U	1	MALE	50	Stage IIIB	T3	N1	M0	0	518	0	518
TCGA-AA-A00W	1	MALE	80	Stage I	T1	N0	M0	0	456	0	456
TCGA-AA-A00Z	1	MALE	70	Stage IIA	T3	N0	M0	0	669	0	669
TCGA-AA-A010	1	FEMALE	46	Stage IIB	T4	N0	M0	0	1064	0	1064
TCGA-AA-A017	1	FEMALE	57	Stage IIA	T3	N0	M0	0	457	0	457
TCGA-AA-A01C	1	MALE	75	Stage IIIA	T2	N1	M0	0	457	0	457
TCGA-AA-A01D	1	FEMALE	47	Stage IIIC	T3	N2	M0	1	334	1	183
TCGA-AA-A01F	1	MALE	72	Stage IIIB	T3	N1	M0	0	974	0	974
TCGA-AA-A01G	1	MALE	63	Stage IIA	T3	N0	M0	0	365	0	365
TCGA-AA-A01I	1	MALE	76	Stage I	T2	N0	M0	0	943	0	943
TCGA-AA-A01K	1	FEMALE	74	Stage IIIC	T3	N2	M0	0	943	0	943
TCGA-AA-A01P	1	FEMALE	80	Stage III	T3	N1	M0	1	1158	1	762
TCGA-AA-A01Q	1	FEMALE	48	Stage II	T3	N0	M0	0	31	0	31
TCGA-AA-A01R	1	MALE	47	Stage III	T3	N2	M0	0	1065	1	608
TCGA-AA-A01S	1	FEMALE	47	Stage III	T3	N1	M0	0	31	0	31
TCGA-AA-A01T	1	FEMALE	63	Stage III	T3	N1	M0	0	1005	0	1005
TCGA-AA-A01V	1	MALE	59	Stage I	T2	N0	M0	0	31	0	31
TCGA-AA-A01X	1	FEMALE	80	Stage III	T2	N1	M0	0	791	1	791
TCGA-AA-A01Z	1	MALE	68	Stage II	T3	N0	M0	0	1126	1	1126
TCGA-AA-A022	1	FEMALE	88	Stage II	T4	N0	M0	0	0	0	0
TCGA-AA-A024	1	MALE	81	Stage II	T3	N0	M0	1	1188	0	1188
TCGA-AA-A029	1	MALE	67	Stage II	T3	N0	M0	0	1581	0	1581
TCGA-AA-A02E	1	FEMALE	82	Stage IV	T3	N1	M1	1	90	0	90
TCGA-AA-A02F	1	FEMALE	68	Stage IV	T3	N1	M1	0	1216	0	1216
TCGA-AA-A02H	1	FEMALE	74	Stage IV	T3	N2	M1	1	61	0	61
TCGA-AA-A02J	1	FEMALE	70	Stage IV	T3	N0	M1	1	153	0	153
TCGA-AA-A02K	1	MALE	50	Stage IV	T4	N2	M1	1	426	1	306
TCGA-AA-A02O	1	MALE	82	Stage II	T3	N0	M0	0	28	0	28
TCGA-AA-A02R	1	FEMALE	84	Stage IIA	T3	N0	M0	1	670	0	670
TCGA-AA-A02W	2	FEMALE	73	Stage I	T2	N0	M0	0	1247	1	1005
TCGA-AA-A02Y	1	MALE	73	Stage I	T2	N0	M0	0	1216	0	1216
TCGA-AA-A03F	1	FEMALE	90	Stage III	T3	N2	M0	0	0	0	0
TCGA-AA-A03J	1	FEMALE	65	Stage I	T2	N0	M0	0	1246	0	1246
TCGA-AD-5900	2	MALE	67	Stage I	T2	N0	MX	0	370	0	370
TCGA-AD-6548	2	FEMALE	81	Stage I	T2	N0	M0	0	650	0	650
TCGA-AD-6888	1	MALE	73	Stage IIIB	T3	N1b	M0	1	472	1	343
TCGA-AD-6889	1	MALE	76	Stage IIA	T3	N0	M0	1	2532	1	1516
TCGA-AD-6890	1	MALE	65		T1	N0	MX	0	746	0	746
TCGA-AD-6895	2	MALE	84	Stage IIIB	T3	N1a	M0	0	763	0	763
TCGA-AD-6899	2	MALE	84	Stage IIIC	T4a	N2b	MX	1	176	0	176
TCGA-AD-6901	2	MALE	78		T3	N0	MX	1	682	1	468
TCGA-AD-6963	1	MALE	58		T3	N0	MX	0	834	0	834
TCGA-AD-6964	2	MALE	58		T4a	N2b		1	331	1	325
TCGA-AD-6965	1	MALE	62	Stage IIIC	T4a	N2b	M0	0	805	1	648
TCGA-AD-A5EJ	1	FEMALE	74	Stage IIA	T3	N0	MX	0	0	0	0
TCGA-AD-A5EK	1	MALE	51	Stage I	T2	N0	MX	0	500	0	500
TCGA-AM-5820	2	FEMALE	59	Stage IVA	T4a	N2	M1	0	14	0	14
TCGA-AM-5821	1	FEMALE	68	Stage IIA	T3	N0	M0	0	28	0	28
TCGA-AU-3779	2	FEMALE	80	Stage IIA	T3	N0	M0	0	441	0	441
TCGA-AU-6004	1	FEMALE	69	Stage I	T2	N0	M0	0	824	0	824
TCGA-AY-4070	2	FEMALE	50	Stage IIIC	T3	N2	M0	1	496	1	186
TCGA-AY-4071	1	FEMALE	63	Stage I	T1	N0		1	29	0	29
TCGA-AY-5543	1	FEMALE	65	Stage IVA	T3	N1a	M1	0	1004	0	1004
TCGA-AY-6196	2	MALE	47	Stage IIIC	T3	N2b		0	6	0	6
TCGA-AY-6197	1	MALE	60	Stage IIA	T3	N0		0	652	0	652
TCGA-AY-6386	1	FEMALE	66	Stage IIIB	T3	N1a	M0	0	542	0	542
TCGA-AY-A54L	1	FEMALE	74	Stage I	T2	N0	M0	0	525	1	396
TCGA-AY-A69D	2	FEMALE	55	Stage IIA	T3	N0	M0	0	543	0	543
TCGA-AY-A71X	1	FEMALE	54	Stage I	T2	N0	M0	0	588	0	588
TCGA-AY-A8YK	1	MALE	44	Stage IVA	T3	N2a	M1	0	573	0	573
TCGA-AZ-4308	1	FEMALE	47	Stage IIIB	T3	N1	M0	0	3324	0	3324
TCGA-AZ-4313	1	FEMALE	51	Stage I	T1	N0	M0	0	2310	0	2310
TCGA-AZ-4315	1	MALE	61	Stage IIA	T3	N0	M0	0	1776	0	1776
TCGA-AZ-4323	2	MALE	37	Stage IV	T4	N2	M1	1	43	0	43
TCGA-AZ-4614	1	FEMALE	71	Stage IVA	T4a	N1	M1	1	172	0	172
TCGA-AZ-4615	1	MALE	84	Stage IIIB	T3	N1	M0	0	1002	1	688
TCGA-AZ-4616	1	FEMALE	82	Stage IV	T3	N2	M1	1	156	0	156
TCGA-AZ-4682	1	MALE	61	Stage IVA	T3	N0	M1	1	680	0	680
TCGA-AZ-4684	1	MALE	49	Stage IVA	T3	N2	M1	0	1977	1	411
TCGA-AZ-5403	1	MALE	43	Stage II	T3	N0	MX	1	1910	1	304
TCGA-AZ-5407	1	FEMALE	51	Stage I	T1	N0	M0	0	2683	0	2683
TCGA-AZ-6598	1	FEMALE	77	Stage II	T3	N0	MX	1	1503	0	1503
TCGA-AZ-6599	1	MALE	72	Stage I	T2	N0	MX	1	206	0	206
TCGA-AZ-6600	2	MALE	64	Stage IV	T4	N1	M1	1	368	0	368
TCGA-AZ-6601	1	MALE	68	Stage II	T3	N0	M0	1	3042	1	2270
TCGA-AZ-6603	2	FEMALE	77		T2	N1	MX	1	899	0	899
TCGA-AZ-6605	2	MALE	77	Stage IIIB	T4	N1	M0	1	159	0	159
TCGA-AZ-6606	1	MALE	81	Stage IV	T4	N2	M1	1	357	0	357
TCGA-AZ-6607	2	MALE	69	Stage IV	T4	N2	M1	1	97	0	97
TCGA-AZ-6608	1	FEMALE	55	Stage IIIA	T2	N1	M0	1	59	0	59
TCGA-CA-5254	1	FEMALE	42	Stage IIA	T3	N0	M0	0	386	0	386
TCGA-CA-5255	1	MALE	45	Stage IIA	T3	N0	M0	0	376	0	376
TCGA-CA-5256	1	FEMALE	54	Stage IIA	T3	N0	M0	0	379	0	379
TCGA-CA-5796	1	FEMALE	52	Stage IIA	T3	N0	M0	0	377	0	377
TCGA-CA-5797	1	MALE	56	Stage IIA	T3	N0	M0	0	383	0	383
TCGA-CA-6715	1	MALE	63	Stage IIIB	T3	N1	M0	0	383	0	383
TCGA-CA-6716	1	MALE	65	Stage IIA	T3	N0	M0	0	371	0	371
TCGA-CA-6717	2	MALE	57	Stage IIA	T3	N0	M0	0	388	0	388
TCGA-CA-6718	2	MALE	46	Stage IIA	T3	N0	M0	1	306	1	207
TCGA-CA-6719	2	MALE	77	Stage IIA	T3	N0	M0	0	435	1	354
TCGA-CK-4947	1	FEMALE	46	Stage IIIB	T4	N1	M0	0	534	1	21
TCGA-CK-4948	2	FEMALE	45	Stage III	T3	N1	M0	0	4502	0	4502
TCGA-CK-4950	2	FEMALE	68	Stage IIIB	T3	N1	M0	0	2599	0	2599
TCGA-CK-4951	1	FEMALE	79	Stage IIA	T3	N0	M0	0	1492	1	480
TCGA-CK-4952	1	FEMALE	48	Stage IIIC	T4	N2	M0	0	475	0	475
TCGA-CK-5912	1	MALE	81	Stage I	T2	N0	MX	1	1493	0	1493
TCGA-CK-5913	1	FEMALE	58	Stage IIA	T3	N0	MX	0	1561	0	1561
TCGA-CK-5914	1	MALE	81	Stage IIIB	T3	N1	MX	0	669	0	669
TCGA-CK-5915	1	MALE	63	Stage I	T2	N0	MX	0	0	0	0
TCGA-CK-5916	1	FEMALE	71	Stage I	T1	N0	M0	1	643	1	292
TCGA-CK-6746	1	FEMALE	84	Stage IIB	T4b	N0	MX	0	0	0	0
TCGA-CK-6747	2	FEMALE	87	Stage IIA	T3	N0	MX	0	820	0	820
TCGA-CK-6748	2	FEMALE	45	Stage IV	T3	N1	M1	0	61	0	61
TCGA-CK-6751	1	FEMALE	88	Stage I	T2	N0	MX	0	518	0	518
TCGA-CM-4743	1	MALE	69	Stage IIA	T3	N0	M0	0	701	0	701
TCGA-CM-4744	1	MALE	69	Stage I	T2	N0	M0	0	609	0	609
TCGA-CM-4746	1	MALE	61	Stage I	T2	N0	M0	0	1126	0	1126
TCGA-CM-4747	1	MALE	47	Stage IVA	T4a	N1b	M1a	0	761	1	NA
TCGA-CM-4748	1	MALE	53	Stage IIIB	T4a	N1a	M0	0	792	0	792
TCGA-CM-4750	1	FEMALE	34	Stage IIIA	T1	N1b	M0	0	244	0	244
TCGA-CM-4751	2	MALE	62	Stage IIIB	T3	N1b	M0	0	822	0	822
TCGA-CM-4752	1	MALE	58	Stage IIA	T3	N0	M0	0	396	0	396
TCGA-CM-5341	1	FEMALE	82	Stage IIIA	T2	N1a	M0	0	884	0	884
TCGA-CM-5344	2	FEMALE	39	Stage IIIB	T3	N1b	M0	0	670	0	670
TCGA-CM-5348	2	MALE	72	Stage IIIB	T3	N1a	M0	0	699	0	699
TCGA-CM-5349	1	FEMALE	68	Stage IIA	T3	N0	M0	0	915	0	915
TCGA-CM-5860	1	MALE	44	Stage IIA	T3	N0	M0	0	974	0	974
TCGA-CM-5861	1	FEMALE	63	Stage IIA	T3	N0	M0	0	457	1	335
TCGA-CM-5862	1	MALE	80	Stage IVA	T3	N1a	M1a	1	153	1	31
TCGA-CM-5863	2	FEMALE	60	Stage IIIB	T3	N1b	M0	0	457	0	457
TCGA-CM-5864	1	MALE	60	Stage I	T2	N0	M0	0	457	0	457
TCGA-CM-5868	1	FEMALE	59	Stage IVA	T4a	N1a	M1a	0	518	0	518
TCGA-CM-6161	2	FEMALE	36	Stage I	T2	N0	M0	0	457	0	457
TCGA-CM-6162	2	FEMALE	48	Stage IIIB	T3	N1a	M0	0	365	0	365
TCGA-CM-6163	2	MALE	74	Stage I	T1	N0	M0	0	427	0	427
TCGA-CM-6164	2	FEMALE	46	Stage IIA	T3	N0	M0	0	883	0	883
TCGA-CM-6165	2	MALE	74	Stage IIA	T3	N0	M0	0	488	0	488
TCGA-CM-6166	1	FEMALE	48	Stage I	T2	N0	M0	0	669	0	669
TCGA-CM-6167	2	FEMALE	57	Stage IIIC	T3	N2b	M0	0	456	0	456
TCGA-CM-6168	2	FEMALE	84	Stage IIA	T3	N0	M0	0	395	0	395
TCGA-CM-6169	2	MALE	67	Stage IIA	T3	N0	M0	0	396	0	396
TCGA-CM-6170	1	FEMALE	73	Stage I	T2	N0	M0	0	457	0	457
TCGA-CM-6171	1	FEMALE	77	Stage I	T2	N0	M0	0	427	0	427
TCGA-CM-6172	2	FEMALE	70	Stage IIIB	T3	N1a	M0	0	335	0	335
TCGA-CM-6674	1	MALE	39	Stage IIA	T3	N0	M0	0	394	0	394
TCGA-CM-6675	1	MALE	35	Stage IVB	T3	N2b	M1b	0	397	1	337
TCGA-CM-6676	2	MALE	82	Stage I	T2	N0	M0	0	337	0	337
TCGA-CM-6677	1	FEMALE	75	Stage IIA	T3	N0	M0	0	337	0	337
TCGA-CM-6678	1	FEMALE	63	Stage IVA	T4a	N1c	M1a	0	335	1	NA
TCGA-CM-6679	2	MALE	58	Stage IIA	T3	N0	M0	0	306	0	306
TCGA-CM-6680	2	FEMALE	78	Stage IIIB	T3	N2a	M0	0	366	0	366
TCGA-D5-5537	1	MALE	83		T3	N2	MX	1	1381	1	722
TCGA-D5-5538	2	FEMALE	60	Stage IIIB	T3	N1b	M0	1	1661	1	1007
TCGA-D5-5539	2	MALE	60	Stage IIIA	T3	N1	M0	0	596	1	579
TCGA-D5-5540	1	MALE	73	Stage IIA	T3	N0	M0	0	1706	0	1706
TCGA-D5-5541	1	MALE	63	Stage IIIB	T3	N1a	M0	0	1701	0	1701
TCGA-D5-6529	2	MALE	69	Stage IIA	T3	N0	M0	0	614	1	386
TCGA-D5-6530	1	MALE	53	Stage I	T2	N0	M0	0	621	0	621
TCGA-D5-6531	1	MALE	75	Stage IIA	T3	N0	M0	0	540	0	540
TCGA-D5-6532	1	MALE	61	Stage IIA	T3	N0	M0	0	555	0	555
TCGA-D5-6533	1	FEMALE	68		T4b	N0	M0	0	775	0	775
TCGA-D5-6534	2	FEMALE	62	Stage IIA	T3	N0	M0	0	1316	0	1316
TCGA-D5-6535	1	FEMALE	80	Stage IIIB	T3	N1	MX	0	460	0	460
TCGA-D5-6536	2	MALE	73	Stage IIA	T3	N0	M0	0	543	1	493
TCGA-D5-6537	1	MALE	64	Stage IIIB	T3	N1a	MX	1	146	1	123
TCGA-D5-6538	1	FEMALE	79	Stage IIIB	T3	N2	M0	0	521	0	521
TCGA-D5-6539	2	FEMALE	45		T3	N0	M0	0	380	0	380
TCGA-D5-6540	1	MALE	66	Stage I	T2	N0	M0	0	491	0	491
TCGA-D5-6541	1	MALE	49	Stage IIA	T3	N0	M0	0	474	0	474
TCGA-D5-6898	2	FEMALE	51	Stage I	T2	N0	M0	0	229	0	229
TCGA-D5-6920	2	FEMALE	77	Stage IIA	T3	N0	M0	0	377	0	377
TCGA-D5-6922	2	MALE	76	Stage IIIA	T3	N1	M0	0	308	0	308
TCGA-D5-6923	1	MALE	57	Stage I	T2	N0	M0	0	378	0	378
TCGA-D5-6924	2	MALE	68	Stage IIA	T3	N0	M0	0	435	0	435
TCGA-D5-6926	1	MALE	65	Stage IIIB	T4a	N1	M0	0	275	0	275
TCGA-D5-6927	1	MALE	34	Stage IIA	T3	N0	M0	0	287	0	287
TCGA-D5-6928	2	MALE	80	Stage IIA	T3	N0	M0	0	354	0	354
TCGA-D5-6929	1	FEMALE	49	Stage IV	T3	N1	M1	0	408	0	408
TCGA-D5-6930	2	MALE	67	Stage IIA	T3	N0	M0	0	406	0	406
TCGA-D5-6931	1	MALE	77	Stage IIIC	T4b	N2	M0	0	365	0	365
TCGA-D5-6932	1	MALE	69	Stage IIA	T3	N0	M0	0	346	0	346
TCGA-D5-7000	1	FEMALE	79	Stage I	T2	N0	M0	0	312	0	312
TCGA-DM-A0X9	1	FEMALE	71	Stage IIA	T3	N0	M0	0	3641	0	3641
TCGA-DM-A0XD	1	MALE	65	Stage IIA	T3	N0	M0	1	743	1	484
TCGA-DM-A0XF	1	FEMALE	68	Stage IIIC	T3	N2	M0	1	1162	0	1162
TCGA-DM-A1D0	1	FEMALE	79	Stage IIA	T3	N0	M0	0	3974	0	3974
TCGA-DM-A1D4	1	MALE	80	Stage IIA	T3	N0	M0	1	2821	1	1920
TCGA-DM-A1D6	1	MALE	88	Stage IIA	T3	N0	M0	1	570	0	570
TCGA-DM-A1D7	1	MALE	82	Stage IIA	T3	N0	M0	NA	NA	1	80
TCGA-DM-A1D8	1	FEMALE	50		T3	N1		1	383	0	383
TCGA-DM-A1D9	1	FEMALE	67	Stage IIA	T3	N0	M0	0	4270	0	4270
TCGA-DM-A1DA	1	FEMALE	71	Stage IIIC	T3	N2	M0	1	228	0	228
TCGA-DM-A1DB	1	MALE	68	Stage IIA	T3	N0	M0	1	1348	0	1348
TCGA-DM-A1HA	1	MALE	82	Stage IIIC	T3	N2	M0	0	2600	0	2600
TCGA-DM-A1HB	1	MALE	75	Stage IIIB	T3	N1	M0	0	4126	0	4126
TCGA-DM-A280	1	FEMALE	70	Stage IIA	T3	N0	M0	1	236	0	236
TCGA-DM-A282	1	FEMALE	60	Stage IIA	T3	N0	M0	0	4233	0	4233
TCGA-DM-A285	1	FEMALE	71	Stage IV	T3	N2	M1	1	179	0	179
TCGA-DM-A288	1	MALE	68	Stage IIIC	T3	N2	M0	1	427	1	320
TCGA-DM-A28A	2	MALE	78	Stage IIIC	T3	N2	M0	1	805	0	805
TCGA-DM-A28C	1	MALE	74	Stage IIA	T3	N0	M0	1	2475	1	1929
TCGA-DM-A28E	1	FEMALE	72	Stage IIA	T3	N0	M0	0	3648	0	3648
TCGA-DM-A28F	1	MALE	73	Stage IIIB	T3	N1	M0	1	1094	0	1094
TCGA-DM-A28G	1	MALE	75	Stage IIA	T3	N0	M0	1	1849	0	1849
TCGA-DM-A28H	1	MALE	50	Stage IIIC	T3	N2	M0	0	3561	1	484
TCGA-DM-A28K	1	MALE	75	Stage IIA	T3	N0	M0	0	2988	0	2988
TCGA-DM-A28M	1	MALE	63	Stage IIA	T3	N0	M0	0	2895	0	2895
TCGA-F4-6459	2	FEMALE	61	Stage IIIB	T3	N2a	M0	1	262	0	262
TCGA-F4-6460	2	FEMALE	51	Stage IIIB	T3	N1	M0	1	972	1	313
TCGA-F4-6461	2	FEMALE	41	Stage IIIC	T4b	N2	M0	1	338	1	288
TCGA-F4-6463	2	MALE	51	Stage IIA	T3	N0	M0	0	1087	0	1087
TCGA-F4-6569	2	MALE	60	Stage I	T2	N0	M0	0	1087	0	1087
TCGA-F4-6570	1	FEMALE	78	Stage IIA	T3	N0	M0	1	188	0	188
TCGA-F4-6703	2	MALE	64	Stage IIA	T3	N0	M0	0	1456	0	1456
TCGA-F4-6704	2	MALE	60	Stage IIIC	T3	N2b	MX	0	47	0	47
TCGA-F4-6805	2	FEMALE	58	Stage IIA	T3	N0	M0	0	1047	0	1047
TCGA-F4-6806	1	FEMALE	59	Stage I	T2	N0	M0	0	1260	1	336
TCGA-F4-6807	2	FEMALE	51	Stage IIIC	T3	N2b	M0	0	1309	0	1309
TCGA-F4-6808	1	FEMALE	54	Stage I	T1	N0	M0	0	1024	0	1024
TCGA-F4-6809	2	FEMALE	52	Stage IVA	T3	N1	M1	1	403	0	403
TCGA-F4-6854	1	FEMALE	77	Stage IIA	T3	N0	M0	0	16	0	16
TCGA-F4-6855	1	FEMALE	70	Stage IIA	T3	N0	M0	0	1442	0	1442
TCGA-F4-6856	1	MALE	45	Stage I	T2	N0	M0	0	1074	0	1074
TCGA-G4-6293	2	FEMALE	49	Stage III	T3	N1	M0	0	4051	0	4051
TCGA-G4-6294	1	MALE	75	Stage IV	T3	N1	M1	1	858	1	517
TCGA-G4-6295	2	FEMALE	70	Stage II	T3	N0	M0	0	254	0	254
TCGA-G4-6297	2	FEMALE	55	Stage IV	T3	N2	M1	0	2506	1	439
TCGA-G4-6298	1	MALE	90	Stage IIIB	T4a	N1	MX	1	0	1	NA
TCGA-G4-6299	2	MALE	69	Stage IIIC	T3	N2	M0	0	2268	0	2268
TCGA-G4-6302	2	FEMALE	90	Stage IIA	T3	N0	M0	0	0	0	0
TCGA-G4-6303	2	FEMALE	54	Stage IV	T3	N1	M1	1	2003	1	872
TCGA-G4-6304	1	FEMALE	66	Stage IIB	T4	N0	M0	0	1631	1	859
TCGA-G4-6306	1	MALE	71		T2	N0	M0	0	1359	0	1359
TCGA-G4-6307	1	FEMALE	37	Stage IIIB	T3	N1	M0	0	1674	0	1674
TCGA-G4-6309	1	FEMALE	40	Stage IIIB	T3	N1	M0	0	2600	1	2176
TCGA-G4-6310	2	MALE	69	Stage IIIB	T3	N1	M0	0	1935	0	1935
TCGA-G4-6311	2	MALE	80	Stage III	T3	N1	MX	0	1199	0	1199
TCGA-G4-6314	2	FEMALE	76	Stage IV	T3	N2	M1	0	1093	1	38
TCGA-G4-6315	1	MALE	66	Stage IV	T3	N1	M1	0	1883	0	1883
TCGA-G4-6317	1	FEMALE	51	Stage IIIC	T3	N2	MX	0	1095	1	592
TCGA-G4-6320	1	MALE	73	Stage III	T3	N1	MX	0	804	0	804
TCGA-G4-6321	1	FEMALE	60	Stage III	T2	N1	MX	0	672	0	672
TCGA-G4-6322	1	MALE	65	Stage IIIB	T3	N1	MX	0	792	1	789
TCGA-G4-6323	1	MALE	50	Stage IA	Tis	N0	MX	0	419	0	419
TCGA-G4-6586	1	FEMALE	73	Stage IIA	T3	N0	M0	0	1089	0	1089
TCGA-G4-6588	1	FEMALE	58	Stage IIA	T3	N0	M0	0	796	0	796
TCGA-G4-6625	2	FEMALE	77	Stage IIA	T3	N0	M0	0	2792	1	2564
TCGA-G4-6626	1	MALE	90	Stage IIA	T3	N0	M0	1	1	0	1
TCGA-G4-6627	2	MALE	84	Stage IIA	T3	N0	M0	0	2175	1	1003
TCGA-G4-6628	1	MALE	78	Stage I	T2	N0	M0	0	2424	0	2424
TCGA-NH-A50T	1	FEMALE	68	Stage IIA	T3	N0	MX	0	553	0	553
TCGA-NH-A50U	1	MALE	42	Stage IVA	T4a	N0	M1a	1	334	1	276
TCGA-NH-A50V	1	MALE	69	Stage IIIB	T3	N2a	M0	0	588	0	588
TCGA-NH-A5IV	1	FEMALE	90	Stage IIA	T3	N0	MX	0	0	0	0
TCGA-NH-A6GA	2	MALE	58	Stage IIIC	T4a	N2a	MX	1	302	1	6
TCGA-NH-A6GB	1	FEMALE	71	Stage IIIC	T3	N2b	MX	0	476	0	476
TCGA-NH-A6GC	1	FEMALE	66	Stage IVB	T4b	N1b	M1b	0	389	0	389
TCGA-NH-A8F7	1	FEMALE	53	Stage IIA	T3	N0	MX	0	543	0	543
TCGA-NH-A8F8	2	MALE	79	Stage IV	T4a	N2b	M1	1	511	0	511
TCGA-QG-A5YV	1	FEMALE	64	Stage IIIC	T4b	N1a	MX	0	1301	0	1301
TCGA-QG-A5YW	2	FEMALE	55	Stage IIIC	T3	N2b	MX	0	896	0	896
TCGA-QG-A5YX	1	FEMALE	61	Stage IIA	T3	N0	MX	0	1003	0	1003
TCGA-QG-A5Z1	1	MALE	71	Stage IIIB	T3	N1b	MX	1	256	0	256
TCGA-QG-A5Z2	1	MALE	61	Stage I	T2	N0	M0	0	952	0	952
TCGA-QL-A97D	1	FEMALE	84	Stage I	T2	N0	MX	0	666	0	666
TCGA-RU-A8FL	1	MALE	51	Stage IIIB	T3	N2a	MX	0	1177	1	256
TCGA-SS-A7HO	1	FEMALE	44	Stage IIB	T4a	N0	M0	0	1829	1	506
TCGA-T9-A92H	1	MALE	82	Stage IIA	T3	N0	M0	0	362	1	81
TCGA-WS-AB45	2	FEMALE	52	Stage IIA	T3	N0	MX	0	2130	0	2130

## Sheet: GSE39582 clinical data
sample	Group	Sex	age	TNM	T	N	M	OS	OS_day	RFS	RFS_days
GSM1681353	2	Male	69	2	T3	N0	M0	0	3930	0	3930
GSM1681354	2	Female	65	1	T2	N0	M0	0	4260	0	4260
GSM1681355	2	Female	54	3	T3	N1	M0	0	4230	0	4230
GSM1681356	2	Female	69	1	T1	N0	M0	0	4020	0	4020
GSM1681357	2	Male	62	2	T3	N0	M0	0	3690	1	720
GSM1681358	2	Male	64	NA	NA	NA	NA	NA	NA	NA	NA
GSM1681359	2	Female	84	2	T3	N0	M0	1	1080	0	1080
GSM1681360	2	Male	85	2	T3	N0	M0	1	900	1	150
GSM1681361	2	Female	76	1	T2	N0	M0	0	2580	0	2580
GSM1681362	2	Male	69	1	T2	N0	M0	0	2580	0	2580
GSM1681363	2	Male	50	2	T3	N0	M0	0	2550	0	2550
GSM1681364	2	Female	71	2	T3	N0	M0	0	2550	0	2550
GSM1681365	2	Male	78	3	T3	N2	M0	0	2580	0	2580
GSM1681366	2	Male	72	NA	NA	NA	NA	NA	NA	NA	NA
GSM1681367	2	Male	67	3	T3	N1	M0	0	2280	0	2280
GSM1681368	2	Male	47	3	T3	N1	M0	0	2430	0	2430
GSM1681369	2	Male	67	3	T3	N2	M0	1	1950	0	1950
GSM1681370	2	Female	77	2	T3	N0	M0	0	2220	0	2220
GSM1681371	2	Male	69	1	T2	N0	M0	0	2040	0	2040
GSM971957	1	Male	34.5	4	T4	N2	M1	1	300	1	0
GSM971958	1	Female	36.4	4	T3	N2	M1	1	270	1	0
GSM971959	1	Male	36.9	2	T4	N0	M0	0	1560	1	120
GSM971960	1	Female	38.2	1	T2	N0	M0	0	2220	0	2220
GSM971961	2	Female	39.2	4	T3	N1	M1	1	960	1	30
GSM971962	2	Male	60.9	3	T4	N2	M0	0	2190	0	2190
GSM971963	2	Male	78.2	2	T3	N0	M0	1	600	1	510
GSM971964	1	Female	35.4	3	T2	N2	M0	0	1050	0	1050
GSM971965	2	Female	37.5	2	T3	N0	M0	0	990	0	990
GSM971966	1	Female	40.5	3	T3	N1	M0	0	1890	0	1890
GSM971967	2	Male	42.6	2	T3	N0	M0	1	930	NA	930
GSM971968	2	Female	44.9	2	T4	N0	M0	0	3360	1	2790
GSM971969	1	Male	30.2	1	T1	N0	M0	0	1890	0	1890
GSM971970	1	Female	31.7	1	T2	N0	M0	0	2580	0	2580
GSM971971	1	Female	34.7	4	T4	N2	M1	0	1950	0	1950
GSM971972	1	Male	40.2	1	T2	N0	M0	0	2250	0	2250
GSM971973	1	Male	24.9	2	T3	N0	M0	0	1380	0	1380
GSM971974	2	Female	40.7	4	T4	N1	M1	0	1680	0	1680
GSM971975	1	Female	41.9	2	T3	N0	M0	0	1380	0	1380
GSM971976	1	Female	45.2	2	T4	N0	M0	0	1080	0	1080
GSM971977	2	Female	40.8	3	T4	N1	M0	0	1470	0	1470
GSM971978	1	Female	71.4	1	T2	N0	M0	0	3270	0	3270
GSM971979	1	Female	66.4	2	T3	N0	M0	0	1590	0	1590
GSM971980	2	Male	76.9	3	T4	N1	M0	0	1770	0	1770
GSM971981	2	Male	81.8	2	T3	N0	M0	0	1440	0	1440
GSM971982	2	Male	79.3	3	T4	N2	M0	1	1260	0	1260
GSM971983	2	Male	75.3	3	T3	N1	M0	0	2610	0	2610
GSM971984	1	Female	68	2	T4	N0	M0	0	2430	1	150
GSM971985	2	Male	66.6	0	T0	N0	M0	0	210	0	210
GSM971986	2	Male	66.3	2	T3	N0	M0	0	2040	0	2040
GSM971987	2	Male	66.7	2	T3	N0	M0	0	2040	0	2040
GSM971988	2	Female	77.2	4	T4	N1	M1	1	540	1	450
GSM971989	2	Male	71.3	1	T2	N0	M0	1	720	1	480
GSM971990	1	Male	83.1	1	T2	N0	M0	1	360	0	360
GSM971991	1	Male	71.3	2	T3	N0	M0	1	1650	0	1650
GSM971992	1	Male	85.6	2	T4	N0	M0	1	600	0	600
GSM971993	1	Male	67.5	2	T3	N0	M0	0	1680	0	1680
GSM971994	1	Male	80.9	2	T3	N0	M0	0	1290	0	1290
GSM971995	2	Female	61.8	2	T4	N0	M0	0	750	0	750
GSM971996	2	Female	63	3	T3	N1	M0	0	2280	0	2280
GSM971997	2	Male	72	3	T3	N2	M0	0	2670	0	2670
GSM971998	2	Male	74.8	3	T3	N1	M0	1	690	1	540
GSM971999	2	Male	61.5	3	T3	N1	M0	0	30	0	30
GSM972000	1	Female	76.4	3	T3	N2	M0	0	270	1	270
GSM972001	1	Male	71.5	3	T2	N1	M0	0	2190	0	2190
GSM972002	1	Male	77.8	3	T4	N1	M0	0	780	1	750
GSM972003	1	Male	64.6	4	T3	N2	M1	1	810	1	0
GSM972004	1	Female	62.9	4	T3	N1	M1	0	2670	0	2670
GSM972005	2	Male	66.1	4	T4	N1	M1	0	1320	1	0
GSM972006	2	Female	67.5	4	T3	N0	M1	1	690	1	0
GSM972007	2	Male	71	4	T4	N2	M1	1	60	0	60
GSM972008	2	Male	67.3	4	T4	N2	M1	1	2160	1	60
GSM972009	2	Male	68.1	4	T3	N2	M1	1	300	1	0
GSM972010	1	Male	74.5	4	T3	N1	M1	1	1380	1	300
GSM972011	2	Female	75.3	4	T4	N1	M1	1	600	1	540
GSM972012	1	Female	86.8	4	T3	N1	M1	0	3030	0	3030
GSM972013	1	Female	89.4	4	T2	N1	M1	1	1290	0	1290
GSM972014	1	Male	65.8	4	T3	N0	M1	1	870	1	0
GSM972015	1	Female	92.4	2	T3	N0	M0	0	2730	0	2730
GSM972016	2	Female	74.5	2	T3	N0	M0	1	480	1	420
GSM972017	1	Female	73	3	T3	N2	M0	0	1290	0	1290
GSM972018	2	Female	68	3	T2	N2	M0	0	3510	0	3510
GSM972019	2	Male	54	3	T3	N3	M0	1	750	1	630
GSM972020	1	Female	49	3	T3	N2	M0	0	2340	1	270
GSM972021	1	Female	58	3	T3	N2	M0	1	1110	1	150
GSM972022	2	Female	76	3	T3	N2	M0	0	2460	0	2460
GSM972023	1	Female	59	3	T3	N1	M0	0	480	1	180
GSM972024	1	Male	62	3	T2	N2	M0	0	1290	1	1110
GSM972025	2	Male	49	3	T3	N2	M0	0	1590	0	1590
GSM972026	2	Male	75	3	T3	N2	M0	1	1020	1	960
GSM972027	1	Female	70	3	T3	N2	M0	0	2820	0	2820
GSM972028	2	Female	46	3	T3	N2	M0	0	2340	0	2340
GSM972029	2	Male	58	3	T4	N2	M0	0	1080	0	1080
GSM972030	2	Female	68	3	T3	N3	M0	0	1560	0	1560
GSM972031	1	Male	81	2	T3	N0	M0	0	1650	0	1650
GSM972032	1	Female	64	2	T3	N0	M0	0	1800	0	1800
GSM972033	1	Female	45	2	T4	N0	M0	0	1500	0	1500
GSM972034	1	Male	77	2	T3	N0	M0	0	1500	0	1500
GSM972035	1	Female	94	2	T3	N0	M0	0	1170	0	1170
GSM972036	2	Female	47	2	T4	N0	M0	0	1500	0	1500
GSM972037	1	Male	78	2	T4	N0	M0	0	990	0	990
GSM972038	1	Male	61	2	T3	N0	M0	1	30	0	30
GSM972039	2	Male	65	4	T4	N0	M1	1	1560	1	0
GSM972040	1	Male	81	2	T3	N0	M0	0	1890	0	1890
GSM972041	1	Male	78	2	T3	N0	M0	0	1650	0	1650
GSM972042	1	Male	83	2	T3	N0	M0	0	1530	0	1530
GSM972043	1	Male	56	4	T3	N0	M1	1	810	1	0
GSM972044	1	Male	58	2	T4	N0	M0	0	1260	0	1260
GSM972045	1	Male	71	4	T3	N0	M1	1	330	1	0
GSM972046	2	Male	54	2	T3	N0	M0	0	1740	1	630
GSM972047	1	Female	93	2	T3	N0	M0	0	990	0	990
GSM972048	1	Female	50	4	T4	N0	M1	0	900	1	0
GSM972049	1	Male	79	2	T3	N0	M0	0	780	0	780
GSM972050	2	Female	75	2	T3	N0	M0	0	570	0	570
GSM972051	2	Female	34	4	T3	N0	M1	1	840	1	0
GSM972052	1	Male	68	2	T2	N0	M0	0	450	0	450
GSM972053	1	Male	55	2	T2	N0	M0	0	870	0	870
GSM972054	2	Male	82	2	T3	N0	M0	0	780	0	780
GSM972055	1	Female	31	2	T4	N0	M0	0	2790	0	2790
GSM972056	2	Female	78	2	T4	N0	M0	0	2760	0	2760
GSM972057	1	Male	70	2	T3	N0	M0	1	780	0	780
GSM972058	2	Female	75	2	T3	N0	M0	0	1800	0	1800
GSM972059	2	Female	76	2	T3	N0	M0	0	1770	0	1770
GSM972060	1	Male	66	2	T3	N0	M0	0	2460	0	2460
GSM972061	1	Female	78	2	T4	N0	M0	1	1290	0	1290
GSM972062	1	Female	43	2	T4	N0	M0	1	690	1	0
GSM972063	1	Male	54	2	T3	N0	M0	0	2100	0	2100
GSM972064	2	Male	60	4	T4	N0	M1	1	660	1	0
GSM972065	1	Male	48	2	T3	N0	M0	0	1380	0	1380
GSM972066	1	Male	69	4	T4	N0	M1	0	1470	1	0
GSM972067	2	Female	83	2	T3	N0	M0	1	5490	0	5490
GSM972068	2	Male	44	2	T4	N0	M0	1	660	1	90
GSM972069	1	Male	68	2	T3	N0	M0	0	6030	0	6030
GSM972070	2	Female	64	2	T4	N0	M0	1	2040	0	2040
GSM972071	1	Female	68	2	T3	N0	M0	0	5490	0	5490
GSM972072	1	Female	70	2	T4	N0	M0	0	5160	0	5160
GSM972073	2	Female	80	2	T3	N0	M0	0	4890	0	4890
GSM972074	1	Female	70	2	T4	N0	M0	1	2250	1	30
GSM972075	1	Male	42	2	T4	N0	M0	1	1320	0	1320
GSM972076	1	Male	48	2	T3	N0	M0	0	4590	0	4590
GSM972077	2	Female	58	2	T3	N0	M0	1	930	1	780
GSM972078	1	Male	63	2	T3	N0	M0	1	4350	1	1620
GSM972079	2	Male	44	2	T3	N0	M0	0	5040	0	5040
GSM972080	1	Male	61	2	T4	N0	M0	0	4950	1	1590
GSM972081	1	Female	68	2	T3	N0	M0	0	780	0	780
GSM972082	2	Male	75	2	T3	N0	M0	1	3960	1	3570
GSM972083	1	Female	65	2	T3	N0	M0	0	3810	0	3810
GSM972084	2	Female	73	2	T3	N0	M0	0	3870	0	3870
GSM972085	1	Male	56	2	T3	N0	M0	0	2910	0	2910
GSM972086	1	Male	81	2	T3	N0	M0	1	1290	0	1290
GSM972087	1	Female	84	2	T3	N0	M0	1	960	1	240
GSM972088	2	Female	73	2	T4	N0	M0	0	2370	0	2370
GSM972089	2	Female	68	2	T3	N0	M0	0	2610	0	2610
GSM972090	1	Female	72	2	T3	N0	M0	0	2070	0	2070
GSM972091	1	Male	67	2	T3	N0	M0	0	2100	1	1350
GSM972092	1	Female	76	2	T3	N0	M0	0	1410	0	1410
GSM972093	2	Female	55	2	T4	N0	M0	0	2220	0	2220
GSM972094	1	Female	67	2	T3	N0	M0	0	1830	0	1830
GSM972095	1	Male	50	2	T3	N0	M0	0	2010	0	2010
GSM972096	1	Female	63	3	T2	N1	M0	0	450	1	90
GSM972097	2	Male	64	3	T4	N1	M0	1	360	1	360
GSM972098	2	Male	66	3	T4	N2	M0	1	450	0	450
GSM972099	1	Male	78	3	T3	N1	M0	0	450	0	450
GSM972100	1	Female	71	3	T4	N2	M0	0	750	0	750
GSM972101	2	Male	56	3	T3	N1	M0	0	1050	1	630
GSM972102	2	Male	22	3	T3	N1	M0	0	1380	0	1380
GSM972103	2	Male	66	3	T3	N2	M0	0	1740	1	840
GSM972104	2	Female	72	3	T3	N3	M0	0	1230	0	1230
GSM972105	2	Male	53	3	T2	N3	M0	0	960	0	960
GSM972106	1	Female	96	3	T3	N1	M0	0	2160	1	270
GSM972107	2	Male	76	3	T3	N1	M0	1	1800	0	1800
GSM972108	1	Male	64	3	T4	N1	M0	0	3090	0	3090
GSM972109	1	Male	96	3	T3	N1	M0	0	1080	0	1080
GSM972110	1	Male	76	3	T4	N2	M0	1	210	1	120
GSM972111	2	Male	63	3	T3	N2	M0	0	660	1	390
GSM972112	2	Female	64	3	T3	N2	M0	1	960	0	960
GSM972113	2	Female	63	3	T3	N1	M0	0	810	1	540
GSM972114	2	Male	73	3	T3	N1	M0	0	1380	0	1380
GSM972115	2	Female	59	3	T3	N3	M0	1	2250	1	330
GSM972116	2	Female	79	3	T3	N2	M0	1	870	1	60
GSM972117	2	Female	78	3	T3	N1	M0	0	960	1	330
GSM972118	1	Male	64	3	T3	N2	M0	0	900	1	570
GSM972119	1	Male	96	3	T4	N1	M0	0	1110	1	750
GSM972120	1	Female	96	3	T3	N1	M0	0	1080	0	1080
GSM972121	2	Male	96	3	T3	N1	M0	0	1050	0	1050
GSM972122	1	Female	97	3	T4	N1	M0	1	570	1	570
GSM972123	1	Male	53	2	T3	N0	M0	0	2130	0	2130
GSM972124	2	Female	49	2	T3	N0	M0	0	2250	0	2250
GSM972125	2	Female	64	2	T3	N0	M0	0	2040	1	420
GSM972126	1	Male	61	2	T3	N0	M0	0	1890	0	1890
GSM972127	2	Female	66	2	T3	N0	M0	0	2550	0	2550
GSM972128	1	Male	64	2	T3	N0	M0	0	2790	0	2790
GSM972129	1	Male	76	2	T2	N0	M0	0	330	0	330
GSM972130	1	Male	76	2	T4	N0	M0	0	1650	0	1650
GSM972131	2	Female	78	2	T3	N0	M0	0	2580	0	2580
GSM972132	1	Female	87	2	T3	N0	M0	1	1830	0	1830
GSM972133	2	Male	64	3	T3	N+	M0	1	1590	1	810
GSM972134	2	Male	74	3	T3	N2	M0	1	420	1	210
GSM972135	1	Female	78	2	T3	N0	M0	1	390	1	120
GSM972136	1	Male	54	3	T3	N1	M0	0	3900	1	1830
GSM972137	1	Male	68	2	T3	N0	M0	0	3870	1	270
GSM972138	1	Male	77	2	T3	N0	M0	1	1590	1	1350
GSM972139	1	Female	69	3	T3	N1	M0	0	3060	1	1140
GSM972140	2	Male	64	2	T4	N0	M0	0	5160	1	1680
GSM972141	2	Male	58	3	T3	N2	M0	0	2520	1	450
GSM972142	1	Female	86	3	T3	N2	M0	1	1050	1	60
GSM972143	1	Male	57	2	T4	N0	M0	0	4620	0	4620
GSM972144	1	Female	63	2	T3	N0	M0	0	3630	0	3630
GSM972145	2	Female	63	3	T3	N2	M0	0	4050	0	4050
GSM972146	2	Male	60	3	T3	N2	M0	0	1980	0	1980
GSM972147	1	Male	79	2	T3	N0	M0	0	4200	0	4200
GSM972148	1	Male	59	3	T3	N1	M0	0	3810	0	3810
GSM972149	1	Male	64	2	T3	N0	M0	0	3960	0	3960
GSM972150	2	Female	55	3	T3	N1	M0	0	3270	0	3270
GSM972151	1	Female	75	3	T3	N1	M0	0	2310	0	2310
GSM972152	1	Female	70	3	T3	N1	M0	0	1680	0	1680
GSM972153	1	Male	71	2	T3	N0	M0	1	1980	0	1980
GSM972154	1	Female	49	3	T4	N2	M0	1	1320	1	90
GSM972155	1	Male	42	3	T3	N2	M0	1	720	1	180
GSM972156	2	Male	67	3	T3	N1	M0	1	3360	0	3360
GSM972157	1	Male	57	3	T3	N1	M0	0	3540	0	3540
GSM972158	2	Female	45	3	T3	N2	M0	0	3600	0	3600
GSM972159	2	Male	67	3	T3	N1	M0	0	2790	0	2790
GSM972160	1	Male	73	2	T3	N0	M0	0	2310	1	1170
GSM972161	1	Female	91	2	T3	N0	M0	1	330	1	270
GSM972162	2	Female	73	3	T3	N1	M0	0	2310	0	2310
GSM972163	2	Male	71	2	T4	N0	M0	0	1230	0	1230
GSM972164	2	Male	70	3	T3	N+	M0	1	2070	1	90
GSM972165	2	Male	67	2	T4	N0	M0	1	2610	1	1080
GSM972166	2	Female	42	3	T3	N+	M0	1	360	1	90
GSM972167	1	Male	47	2	T3	N0	M0	1	1350	1	1080
GSM972168	2	Male	76	3	T4	N+	M0	1	240	1	120
GSM972169	1	Male	50	2	T4	N0	M0	0	4920	0	4920
GSM972170	1	Female	67	3	T2	N2	M0	0	2190	0	2190
GSM972171	2	Female	70	3	T4	N1	M0	0	3900	0	3900
GSM972172	2	Female	88	2	T4	N0	M0	1	150	1	120
GSM972173	1	Female	59	2	T4	N0	M0	1	780	1	450
GSM972174	1	Male	75	3	T3	N1	M0	0	2910	0	2910
GSM972175	1	Female	83	3	T3	N1	M0	1	1290	1	840
GSM972176	2	Female	85	3	T4	N2	M0	1	1080	1	1050
GSM972177	2	Male	71	2	NA	NA	NA	1	660	1	600
GSM972178	2	Female	69	3	NA	NA	NA	0	2010	1	630
GSM972179	2	Male	77	2	NA	NA	NA	1	540	1	510
GSM972180	1	Female	66	2	NA	NA	NA	1	720	1	570
GSM972181	2	Male	69	3	NA	NA	NA	1	1020	1	390
GSM972182	1	Male	53	2	T4	N0	M0	1	1740	1	690
GSM972183	1	Female	62	3	NA	NA	NA	1	960	1	330
GSM972184	2	Female	70	2	NA	NA	NA	1	1170	1	120
GSM972185	1	Female	58	3	NA	NA	NA	0	1170	1	660
GSM972186	2	Female	50	3	NA	NA	NA	1	1410	1	420
GSM972187	2	Male	62	2	T3	N0	M0	0	1470	1	270
GSM972188	1	Female	58	3	T3	N2	M0	0	660	1	330
GSM972189	1	Male	63	3	T4	N+	M0	0	5760	0	5760
GSM972190	1	Male	68	2	T3	N0	M0	0	3240	0	3240
GSM972191	1	Male	49	3	T3	N1	M0	0	3660	0	3660
GSM972192	2	Female	72	2	T3	N0	M0	0	4740	0	4740
GSM972193	1	Female	51	3	T3	N1	M0	0	2190	0	2190
GSM972194	1	Male	43	3	T3	N2	M0	0	2490	0	2490
GSM972195	1	Female	54	2	T3	N0	M0	0	3600	0	3600
GSM972196	1	Female	69	2	T3	N0	M0	0	2190	0	2190
GSM972197	1	Female	78	2	T3	N0	M0	0	1500	0	1500
GSM972198	1	Female	52	3	T3	N1	M0	0	1710	0	1710
GSM972199	1	Male	73	3	T3	N2	M0	0	1980	0	1980
GSM972200	1	Male	61	2	T3	N0	M0	0	1620	0	1620
GSM972201	2	Male	78	3	T3	N2	M0	0	2010	0	2010
GSM972202	1	Female	57	3	T3	N1	M0	0	1590	0	1590
GSM972203	1	Female	66	3	T3	N2	M0	0	1620	0	1620
GSM972204	1	Male	78	2	NA	NA	NA	0	1320	1	120
GSM972205	1	Male	76	2	NA	NA	NA	1	1050	1	210
GSM972206	2	Male	74	2	NA	NA	NA	0	1260	1	0
GSM972207	1	Male	65	3	T3	N1	M0	0	2460	1	1020
GSM972208	2	Male	63	4	T4	N2	M1	1	750	1	0
GSM972209	2	Male	54	4	T3	N2	M1	1	390	1	0
GSM972210	1	Male	50	4	T3	N+	M1	1	1380	1	0
GSM972211	2	Male	65	3	T3	N1	M0	0	1710	0	1710
GSM972212	1	Female	54	4	T3	N1	M1	1	540	1	0
GSM972213	1	Female	71	4	T3	N0	M1	1	30	1	0
GSM972214	1	Female	88	4	T3	N2	M1	1	60	1	0
GSM972215	1	Female	73	3	T4	N2	M0	0	1410	0	1410
GSM972216	1	Female	45	4	T3	N2	M1	0	2820	1	0
GSM972217	1	Male	73	4	T3	N1	M1	0	2100	1	0
GSM972218	1	Female	75	4	T4	N3	M1	1	210	1	0
GSM972219	1	Male	60	4	T3	N2	M1	0	1590	1	0
GSM972220	2	Male	81	3	T3	N1	M0	0	30	0	30
GSM972221	1	Female	75	2	T3	N0	M0	0	1950	0	1950
GSM972222	2	Female	69	2	T3	N0	M0	0	1710	0	1710
GSM972223	2	Male	78	2	T3	N0	M0	1	990	0	990
GSM972224	2	Male	74	3	T4	N2	M0	1	750	1	600
GSM972225	1	Male	51	2	T3	N0	M0	0	1110	0	1110
GSM972226	2	Male	57	2	T4	N0	M0	0	600	0	600
GSM972227	1	Male	61	4	T3	N2	M1	1	600	0	600
GSM972228	2	Male	68	2	T3	N0	M0	0	30	0	30
GSM972229	1	Female	81	2	T3	N0	M0	0	0	0	0
GSM972230	1	Male	55	3	T3	N1	M0	0	810	0	810
GSM972231	2	Male	54	4	T3	N1	M1	0	420	0	420
GSM972232	2	Male	69	4	T4	N2	M1	0	630	0	630
GSM972233	1	Male	67	2	T3	N0	M0	0	450	0	450
GSM972234	2	Male	79	4	T3	N1	M1	1	300	0	300
GSM972235	1	Female	57	3	T2	N1	M0	0	210	0	210
GSM972236	1	Male	71	4	T1	N0	M1	0	360	0	360
GSM972237	1	Female	55	1	T1	N0	M0	0	750	0	750
GSM972238	1	Female	53	3	T2	N1	M0	0	570	0	570
GSM972239	2	Male	59	2	T3	N0	M0	0	420	0	420
GSM972240	2	Female	67	4	T3	N1	M1	0	420	0	420
GSM972241	1	Male	61	2	T3	N0	M0	1	510	0	510
GSM972242	2	Male	69	1	T2	N0	M0	0	510	0	510
GSM972243	2	Male	66	2	T3	N0	M0	0	60	0	60
GSM972244	2	Female	51	1	T1	N0	M0	0	420	0	420
GSM972245	2	Male	77	4	T4	N1	M1	1	0	0	0
GSM972246	1	Female	92	3	T3	N1	M0	0	0	0	0
GSM972247	1	Male	79	2	T4	N0	M0	0	180	0	180
GSM972248	1	Male	58	2	T3	N0	M0	0	420	0	420
GSM972249	1	Female	74	1	T1	N0	M0	0	420	0	420
GSM972250	1	Male	52	3	T3	N1	M0	0	360	0	360
GSM972251	2	Male	57	4	T4	N1	M1	1	210	0	210
GSM972252	1	Female	37	4	T3	N1	M1	0	480	0	480
GSM972253	2	Female	56	4	T3	N2	M1	0	480	0	480
GSM972254	2	Female	77	4	T3	N0	M1	0	420	1	270
GSM972255	2	Female	81	2	T3	N0	M0	0	150	0	150
GSM972256	2	Female	63	4	T4	N1	M1	0	570	1	390
GSM972257	1	Female	88	2	T4	N0	M0	1	630	1	270
GSM972258	1	Female	77	2	T4	N0	M0	1	0	0	0
GSM972259	2	Female	72	2	T4	N0	M0	0	870	0	870
GSM972260	1	Male	70	4	T3	N2	M1	0	390	0	390
GSM972261	2	Female	79	3	T4	N1	M0	1	210	0	210
GSM972262	2	Female	88	2	T4	N0	MX	0	150	0	150
GSM972263	2	Male	32	3	T2	N1	M0	0	2280	0	2280
GSM972264	1	Male	46	2	T3	N0	M0	0	2190	0	2190
GSM972265	2	Female	78	3	T3	N1	M0	0	1800	0	1800
GSM972266	1	Male	56	4	T4	N2	M1	1	600	0	600
GSM972267	1	Male	82	2	T3	N0	M0	1	2010	0	2010
GSM972268	2	Male	67	3	T2	N1	M0	0	1440	0	1440
GSM972269	2	Male	70	1	T2	N0	M0	0	2370	0	2370
GSM972270	2	Female	75	2	T4	N0	M0	0	1950	0	1950
GSM972271	1	Male	92	3	T4	N1	M0	1	420	1	390
GSM972272	2	Female	47	4	T3	N1	M1	1	450	0	450
GSM972273	2	Male	84	0	Tis	N0	M0	1	480	0	480
GSM972274	2	Female	91	3	T4	N2	M0	0	1710	0	1710
GSM972275	2	Male	76	2	T4	N0	M0	1	120	1	90
GSM972276	2	Male	59	3	T3	N2	M0	0	1290	0	1290
GSM972277	1	Female	88	2	T4	N0	M0	0	1530	0	1530
GSM972278	1	Female	72	1	T2	N0	M0	0	1350	0	1350
GSM972279	2	Female	67	3	T3	N1	M0	0	1560	0	1560
GSM972280	1	Female	79	2	T4	N0	M0	1	1380	0	1380
GSM972281	1	Male	64	1	T1	N0	M0	0	1680	0	1680
GSM972282	1	Female	79	1	T2	N0	M0	0	1530	0	1530
GSM972283	1	Male	65	2	T3	N0	M0	0	1530	0	1530
GSM972284	1	Female	63	4	T4	N2	M1	1	810	0	810
GSM972285	2	Male	71	2	T2	N0	M0	1	60	0	60
GSM972286	1	Male	24	2	T3	N0	M0	0	1110	0	1110
GSM972287	2	Male	77	2	T3	N0	M0	0	1290	0	1290
GSM972288	2	Male	53	4	T4	N1	M1	1	1050	0	1050
GSM972289	1	Male	72	4	T4	N1	M1	1	510	0	510
GSM972290	2	Female	70	1	T2	N0	M0	0	1170	0	1170
GSM972291	2	Male	46	3	T4	N2	M0	0	960	1	300
GSM972292	2	Female	62	2	T3	N0	M0	0	750	0	750
GSM972293	2	Male	NA	1	T2	N0	M0	0	1500	0	1500
GSM972294	2	Male	74	2	T3	N0	M0	0	750	0	750
GSM972295	1	Male	68	3	T4	N1	M0	0	1830	0	1830
GSM972296	1	Female	77	0	Tis	N0	M0	0	660	0	660
GSM972297	2	Male	77	1	T1	N0	M0	1	1380	0	1380
GSM972298	2	Female	83	2	T3	N0	M0	0	270	0	270
GSM972299	2	Female	54	4	T4	N2	M1	1	1230	0	1230
GSM972300	2	Male	75	0	Tis	N0	M0	0	1230	0	1230
GSM972301	2	Male	74	3	T3	N2	M0	1	3150	0	3150
GSM972302	1	Male	79	3	T4	N1	M0	1	810	0	810
GSM972303	1	Female	80	1	T2	N0	M0	0	570	0	570
GSM972304	1	Female	60	2	T3	N0	M0	0	900	0	900
GSM972305	2	Female	82	3	T4	N2	M0	0	930	0	930
GSM972306	1	Male	70	2	T3	N0	M0	0	1680	0	1680
GSM972307	1	Female	71	2	T3	N0	M0	0	2460	0	2460
GSM972308	2	Female	79	3	T3	N1	M0	0	2760	0	2760
GSM972309	1	Male	78	2	T3	N0	M0	0	2850	0	2850
GSM972310	2	Female	80	3	T3	N1	M0	0	750	0	750
GSM972311	2	Male	55	2	T3	N0	M0	0	3180	0	3180
GSM972312	1	Male	71	2	T3	N0	M0	1	2910	0	2910
GSM972313	1	Female	83	1	T2	N0	M0	1	2730	0	2730
GSM972314	1	Female	86	3	T3	N1	M0	0	1380	0	1380
GSM972315	2	Female	60	1	T1	N0	M0	0	2520	0	2520
GSM972316	1	Female	77	2	T3	N0	M0	0	2490	0	2490
GSM972317	2	Male	85	2	T3	N0	M0	1	900	1	150
GSM972318	1	Female	84	2	T3	N0	M0	1	1080	0	1080
GSM972319	1	Female	71	2	T3	N0	M0	1	2340	0	2340
GSM972320	2	Male	64	3	T2	N1	M0	1	1740	1	300
GSM972321	1	Male	52	3	T3	N2	M0	0	270	0	270
GSM972322	2	Male	46	2	T3	N0	M0	1	2580	1	1980
GSM972323	1	Female	67	3	T3	N1	M0	0	2400	0	2400
GSM972324	1	Male	72	2	T3	N0	M0	0	2460	0	2460
GSM972325	1	Male	55	3	T3	N1	M0	0	2130	1	1590
GSM972326	2	Female	71	2	T3	N0	M0	0	2550	0	2550
GSM972327	2	Male	60	2	T3	N0	M0	0	2490	0	2490
GSM972328	1	Male	74	3	T3	N2	M0	0	2460	1	2340
GSM972329	2	Male	61	2	T3	N0	M0	0	2340	0	2340
GSM972330	2	Female	79	2	T3	N0	M0	0	2580	0	2580
GSM972331	1	Male	79	2	T3	N0	M0	1	2250	0	2250
GSM972332	2	Female	72	2	T3	N0	M0	0	2610	0	2610
GSM972333	1	Male	49	2	T3	N0	M0	0	2400	0	2400
GSM972334	1	Female	79	3	T3	N2	M0	0	2310	0	2310
GSM972335	1	Male	73	1	T2	N0	M0	1	1380	0	1380
GSM972336	1	Male	63	3	T3	N1	M0	0	1500	0	1500
GSM972337	2	Female	80	3	T3	N1	M0	1	1230	0	1230
GSM972338	1	Male	69	2	T3	N0	M0	0	2220	0	2220
GSM972339	1	Male	67	3	T3	N1	M0	0	2280	0	2280
GSM972340	2	Male	75	2	T3	N0	M0	0	2520	1	1440
GSM972341	1	Female	89	3	T3	N1	M0	0	2070	0	2070
GSM972342	2	Male	78	1	T2	N0	M0	0	840	0	840
GSM972343	1	Male	86	2	T3	N0	M0	1	1560	0	1560
GSM972344	1	Female	70	2	T3	N0	M0	0	2250	0	2250
GSM972345	2	Male	83	3	T3	N2	M0	1	1260	1	1230
GSM972346	1	Female	82	3	T3	N1	M0	1	2160	0	2160
GSM972347	1	Female	73	2	T3	N0	M0	0	210	0	210
GSM972348	1	Male	60	2	T3	N0	M0	0	1860	0	1860
GSM972349	2	Female	79	3	T4	N1	M0	1	150	0	150
GSM972350	1	Female	84	3	T3	N1	M0	1	270	NA	270
GSM972351	1	Male	71	2	T4	N0	M0	0	720	0	720
GSM972352	2	Male	66	3	T3	N2	M0	0	4170	1	2220
GSM972353	1	Female	46	2	T4	N0	M0	0	3990	0	3990
GSM972354	1	Female	68	3	T3	N2	M0	1	2850	1	690
GSM972355	2	Male	72	2	T3	N0	M0	1	1020	1	510
GSM972356	1	Female	73	2	T3	N0	M0	1	1590	NA	1590
GSM972357	2	Female	88	2	T3	N0	M0	1	1260	0	1260
GSM972358	1	Female	53	2	T3	N0	M0	0	2430	0	2430
GSM972359	2	Female	56	2	T3	N0	M0	1	900	1	360
GSM972360	1	Female	54	3	T3	N1	M0	0	4230	0	4230
GSM972361	2	Female	72	3	T4	N2	M0	1	570	1	540
GSM972362	1	Male	50	3	T3	N1	M0	0	2940	0	2940
GSM972363	1	Female	68	3	T3	N1	M0	0	4200	0	4200
GSM972364	1	Female	71	3	T3	N1	M0	0	3090	0	3090
GSM972365	2	Female	59	3	T3	N2	M0	0	1410	0	1410
GSM972366	2	Male	50	3	T3	N2	M0	1	720	1	420
GSM972367	2	Male	72	3	T3	N1	M0	0	2850	0	2850
GSM972368	1	Female	70	3	T3	N1	M0	0	2760	0	2760
GSM972369	2	Male	58	3	T3	N2	M0	1	3060	1	540
GSM972370	1	Female	73	3	T3	N1	M0	1	2130	1	960
GSM972371	1	Male	47	3	T3	N1	M0	0	2430	0	2430
GSM972372	1	Male	59	3	T4	N2	M0	1	1500	1	990
GSM972373	1	Male	66	3	T3	N1	M0	0	2370	1	1110
GSM972374	2	Male	65	3	T1	N1	M0	0	2700	0	2700
GSM972375	2	Female	46	3	T3	N1	M0	0	3510	0	3510
GSM972376	1	Female	73	3	T3	N2	M0	0	2610	0	2610
GSM972377	2	Female	59	3	T3	N1	M0	0	2460	0	2460
GSM972378	2	Male	78	3	T3	N2	M0	0	2580	0	2580
GSM972379	2	Female	63	3	T2	N1	M0	0	2850	0	2850
GSM972380	2	Female	64	3	T3	N2	M0	1	450	1	180
GSM972381	2	Male	63	2	T3	N0	M0	1	1440	1	810
GSM972382	1	Male	58	2	T3	N0	M0	1	1140	1	1110
GSM972383	1	Female	70	2	T3	N0	M0	0	2760	0	2760
GSM972384	1	Male	61	2	T3	N0	M0	1	3180	0	3180
GSM972385	2	Male	70	2	T3	N0	M0	0	1890	0	1890
GSM972386	1	Female	77	2	T3	N0	M0	0	2700	0	2700
GSM972387	1	Male	62	2	T3	N0	M0	0	3690	1	720
GSM972388	1	Female	75	2	T3	N0	M0	1	2490	0	2490
GSM972389	2	Male	77	2	T4	N0	M0	0	2790	0	2790
GSM972390	2	Male	87	3	T3	N1	M0	1	240	1	180
GSM972391	1	Male	68	2	T3	N0	M0	1	1560	1	1290
GSM972392	1	Female	75	2	T4	N0	M0	1	1320	1	630
GSM972393	1	Male	76	2	T3	N0	M0	1	1410	1	150
GSM972394	2	Male	81	3	T3	N1	M0	1	330	1	180
GSM972395	1	Male	64	3	T4	N1	M0	0	4410	0	4410
GSM972396	2	Male	72	2	T3	N0	M0	0	3210	0	3210
GSM972397	1	Female	83	2	T3	N0	M0	0	3150	0	3150
GSM972398	1	Male	65	2	T3	N0	M0	1	1920	0	1920
GSM972399	1	Female	54	3	T4	N1	M0	0	2700	0	2700
GSM972400	2	Female	67.8	4	T4	N2	M1	1	330	1	240
GSM972401	2	Male	69	2	T3	N0	M0	1	0	0	0
GSM972402	2	Male	71	2	T3	N0	M1	1	930	1	0
GSM972403	1	Female	70	2	T3	N0	M0	0	1680	0	1680
GSM972404	1	Male	68	2	T3	N0	M0	0	1440	0	1440
GSM972405	1	Female	70	2	T4	N0	M0	1	2370	0	2370
GSM972406	2	Female	66	2	T3	N0	M0	0	3180	0	3180
GSM972407	1	Female	42	2	T4	N0	M0	0	3960	0	3960
GSM972408	2	Male	66	2	T3	N0	M0	1	960	0	960
GSM972409	2	Female	72	2	T4	N0	M0	0	3120	0	3120
GSM972410	2	Female	68	2	T3	N0	M0	0	2730	0	2730
GSM972411	1	Female	48	3	T1	N1	M0	0	3750	0	3750
GSM972412	2	Male	78	3	T3	N2	M0	1	240	1	150
GSM972413	2	Male	66	3	T3	N1	M0	1	600	1	480
GSM972414	1	Female	52	2	T3	N0	M0	0	1590	0	1590
GSM972415	1	Male	69	3	T3	N1	M0	1	1260	1	240
GSM972416	2	Male	49	2	T4	N0	M0	1	240	1	150
GSM972417	1	Male	59	2	T3	N0	M0	0	4380	0	4380
GSM972418	1	Male	64	2	T3	N0	M0	0	2100	0	2100
GSM972419	2	Female	85	3	T3	N2	M0	1	960	1	900
GSM972420	2	Male	83	3	T3	N2	M0	1	180	1	180
GSM972421	2	Male	66	3	NA	NA	NA	0	840	1	660
GSM972422	2	Male	74	2	NA	NA	NA	1	1110	1	390
GSM972423	2	Female	52	2	NA	NA	NA	0	1200	1	390
GSM972424	1	Male	70	2	T3	N0	M0	0	3120	0	3120
GSM972425	2	Female	72	3	T3	N1	M0	0	1770	0	1770
GSM972426	2	Male	49	2	T3	N0	M0	0	2430	0	2430
GSM972427	2	Male	63	2	T3	N0	M0	0	1590	0	1590
GSM972428	2	Male	62	3	T3	N2	M0	0	1650	0	1650
GSM972429	2	Male	64	3	T4	N2	M0	0	1860	0	1860
GSM972430	2	Female	43	2	T3	N0	M0	0	1590	0	1590
GSM972431	1	Male	59	3	T3	N1	M0	0	1620	0	1620
GSM972432	2	Male	71	3	NA	NA	NA	0	1650	1	570
GSM972433	2	Male	85	3	NA	NA	NA	1	480	1	90
GSM972434	1	Male	70	2	NA	NA	NA	1	1260	1	570
GSM972435	1	Male	71	3	NA	NA	NA	0	1200	1	420
GSM972436	1	Male	81	2	NA	NA	NA	1	540	1	60
GSM972437	2	Female	48	4	T3	N2	M1	1	210	1	0
GSM972438	2	Male	44	4	T4	N1	M1	1	900	1	0
GSM972439	2	Male	65	4	T3	N1	M1	1	60	1	0
GSM972440	2	Male	50	2	T3	N0	M0	0	1560	0	1560
GSM972441	2	Female	49	4	T4	N2	M1	0	2040	1	0
GSM972442	2	Female	54	4	T3	N2	M1	1	180	1	0
GSM972443	1	Male	49	2	T3	N0	M0	0	1440	0	1440
GSM972444	2	Male	73	3	T4	N2	MX	1	420	1	150
GSM972445	1	Male	48	2	T4	N0	M0	0	1050	0	1050
GSM972446	1	Male	67	3	T3	N1	MX	NA	NA	NA	NA
GSM972447	2	Male	71	2	T3	N0	M0	0	930	0	930
GSM972448	2	Female	74	2	T3	N0	M0	NA	NA	NA	NA
GSM972449	2	Female	51	3	T4	N1	M0	1	1230	1	570
GSM972450	1	Male	80	2	T3	N0	M0	1	1410	1	570
GSM972451	1	Male	58	2	T4	N0	M0	0	2910	0	2910
GSM972452	1	Female	75	3	T3	N2	M0	0	2970	0	2970
GSM972453	1	Female	51	3	T3	N1	M0	0	3000	0	3000
GSM972454	2	Male	62	1	T2	N0	M0	0	2250	0	2250
GSM972455	2	Female	89	3	T3	N1	M0	0	2220	0	2220
GSM972456	1	Female	82	2	T3	N0	M0	1	0	0	0
GSM972457	2	Female	74	3	T3	N1	M0	0	2040	1	1020
GSM972458	1	Male	65	2	T3	N0	M0	1	510	0	510
GSM972459	1	Male	80	2	T3	N0	M0	0	360	0	360
GSM972460	1	Female	70	2	T3	N0	M0	0	2880	0	2880
GSM972461	1	Male	56	2	T3	N0	M0	0	2880	0	2880
GSM972462	1	Male	72	1	T2	N0	M0	0	2640	0	2640
GSM972463	2	Male	67	3	T4	N2	M0	1	60	NA	#VALUE!
GSM972464	2	Female	76	1	T2	N0	M0	0	2580	0	2580
GSM972465	1	Male	73	2	T3	N0	M0	1	2520	0	2520
GSM972466	1	Female	73	3	T3	N1	M0	0	2250	0	2250
GSM972467	2	Male	54	3	T3	N2	M0	0	2160	0	2160
GSM972468	1	Male	73	2	T3	N0	M0	1	720	0	720
GSM972469	1	Male	69	1	T2	N0	M0	0	2580	0	2580
GSM972470	2	Male	50	2	T3	N0	M0	0	2550	0	2550
GSM972471	2	Female	73	1	T2	N0	M0	NA	#VALUE!	NA	#VALUE!
GSM972472	1	Male	58	2	T4	N0	M0	0	2400	0	2400
GSM972473	2	Male	67	2	T3	N0	M0	0	3510	1	1350
GSM972474	1	Female	49	3	T3	N1	M0	0	3570	1	270
GSM972475	2	Female	68	2	T3	N0	M0	0	2610	0	2610
GSM972476	2	Male	61	3	T4	N1	M0	0	1920	0	1920
GSM972477	1	Male	75	2	T3	N0	M0	0	2430	0	2430
GSM972478	2	Male	80	2	T3	N0	M0	0	2070	0	2070
GSM972479	2	Male	79	3	T4	N2	M0	0	90	0	90
GSM972480	1	Male	78	2	T3	N0	M0	0	2070	0	2070
GSM972481	1	Male	67	3	T3	N2	M0	1	1950	0	1950
GSM972482	2	Female	90	2	T3	N0	M0	0	1260	0	1260
GSM972483	1	Female	80	2	T3	N0	M0	1	840	1	690
GSM972484	1	Male	68	2	T3	N0	M0	0	2280	0	2280
GSM972485	2	Male	69	2	T3	N0	M0	0	2250	0	2250
GSM972486	2	Male	87	2	T3	N0	M0	0	990	0	990
GSM972487	2	Male	84	2	T3	N0	M0	0	2010	0	2010
GSM972488	2	Male	65	2	T3	N0	M0	0	1470	0	1470
GSM972489	2	Female	77	2	T3	N0	M0	0	2220	0	2220
GSM972490	1	Male	67	2	T3	N0	M0	0	2220	0	2220
GSM972491	1	Male	74	2	T3	N0	M0	0	2100	0	2100
GSM972492	1	Male	69	1	T2	N0	M0	0	2040	0	2040
GSM972493	1	Female	89	2	T3	N0	M0	0	1770	0	1770
GSM972494	2	Female	43	1	T2	N0	M0	0	1710	0	1710
GSM972495	2	Female	69	3	T3	N1	M0	1	810	1	540
GSM972496	2	Female	65	1	T2	N0	M0	0	4260	0	4260
GSM972497	1	Female	77	3	T2	N1	M0	0	30	0	30
GSM972498	1	Female	50	3	T3	N1	M0	1	1770	1	570
GSM972499	1	Male	82	3	T4	N2	M0	0	2160	0	2160
GSM972500	2	Female	74	2	T3	N0	M0	NA	NA	NA	NA
GSM972501	1	Female	76	3	T3	N1	M0	1	3180	0	3180
GSM972502	1	Male	69	2	T3	N0	M0	0	3930	0	3930
GSM972503	2	Female	42	2	T3	N0	M0	0	4380	0	4380
GSM972504	2	Male	80	3	T3	N2	M0	1	900	1	720
GSM972505	1	Male	69	2	T3	N0	M0	0	4320	0	4320
GSM972506	2	Male	68	2	T3	N0	M0	0	4230	0	4230
GSM972507	2	Female	83	3	T3	N1	M0	0	1260	0	1260
GSM972508	1	Female	69	1	T1	N0	M0	0	4020	0	4020
GSM972509	1	Female	73	1	T2	N0	M0	0	420	0	420
GSM972510	2	Male	89	2	T3	N0	M0	0	2580	0	2580
GSM972511	1	Male	75	3	T3	N2	M0	1	1410	0	1410
GSM972512	2	Male	62	3	T4	N2	M0	1	690	1	120
GSM972513	1	Male	85	3	T3	N1	M0	1	1440	1	390
GSM972514	1	Female	79	3	T2	N1	M0	1	960	NA	NA
GSM972515	1	Female	72	2	T3	N0	M0	0	3540	0	3540
GSM972516	1	Male	82	2	T3	N0	M0	0	1980	0	1980
GSM972517	1	Female	88	2	T3	N0	M0	1	1110	1	960
GSM972518	2	Female	82	3	T4	N1	M0	1	1050	1	450
GSM972519	2	Male	58	2	T3	N0	M0	1	420	1	330
GSM972520	1	Male	76	3	T3	N1	M0	1	1860	0	1860
GSM972521	2	Female	90	2	T3	N0	M0	1	2280	0	2280
GSM972522	2	Female	53	2	T3	N0	M0	0	2970	0	2970

## Sheet: Gene set for NMF
Gene_symbol
CDK2
CDK4
CDK5
CDK6
CDK7
CDK9
CDKN1A
CDKN1B
CDKN1C
CDKN2A
CDKN2B
CDKN2C
CDKN2D
RRAGB
CDKN3
CARM1
MYBBP1A
LAMTOR5
ERN2
GAS2L1
CGRRF1
CGREF1
RRAGA
PLK2
ZNF268
WDR6
RASSF1
CHEK2
UHRF2
WHAMM
PLK3
UHMK1
JMY
E2F7
DAB2IP
SLC38A9
BRINP1
SDE2
GADD45A
DDIT3
ZBTB49
CDC14C
DHCR24
ARID3A
DUSP1
E2F1
E2F4
E4F1
EIF4G2
EP300
AKT2
ERN1
EVI2B
FAP
DDIAS
HEPACAM
FGF10
VASH1
FOXE3
CNOT1
FOXM1
RRP8
PPP1R15A
CNOT6L
MTOR
ABL1
CNOT10
ZNF385A
GAS1
GAS2
GATA6
HBP1
MTBP
SGSM3
BIN1
GML
SFN
PPP2R3B
GPER1
LAMTOR2
RGCC
CNOT7
APBB1
APBB2
APC
HRAS
PRMT1
HSP90AB1
WHAMMP3
BRINP3
ID2
IFNG
IFNW1
CXCL8
IL12A
IL12B
ILK
INHA
INHBA
INSM1
IRF1
IRF6
NUPR2
LAMTOR4
MIR200B
MIR34A
SMAD3
MDM2
MDM4
MIF
MLF1
FOXO4
EIF2AK4
MSH2
MUC1
MYC
ZFHX3
MYOG
NBN
ATM
NEUROD1
NKX3-1
CNOT2
CNOT3
CNOT4
NOTCH1
NOTCH2
MLXIPL
PCNA
ING4
CRLF3
PRKAG2
TRIAP1
GTSE1
CAB39
MAP3K20
PKD1
PKD2
PLAGL1
PRKAG3
PML
POU4F1
BTG4
PPM1A
PPM1G
LAMTOR1
PPP2R5B
PIDD1
STRADB
CNOT11
PRKAA1
PRKAA2
PRKAB1
PRKAB2
PRKACA
PRKAG1
PRR11
KMT2E
MAP2K1
MAP2K6
PRNP
RPRM
PCBP4
CNOT6
RPTOR
BRINP2
BARD1
BAX
RRAGD
RB1
RBL2
CCND1
RHEB
RPL26
MAPK12
RRAGC
SETMAR
MLST8
SKIL
SOX2
SOX4
BRCA1
AURKA
STK11
TCF7L2
TFAP4
TFDP1
TFDP2
TGFB1
TGFB2
TGFBR1
THBS1
TP53
TP73
TSG101
WNT10B
ZBTB17
RNF112
BTG2
HMGN5
MCPH1
E2F8
HMGA2
CALR
CAB39L
MED25
FZD9
CASP2
SLC25A33
PPP1R9B
TBRG1
TNKS1BP1
CDC14B
CDC14A
LAMTOR3
PNPT1
CRADD
KAT2B
CDK5R1
CDC123
CCNB1
PHOX2B
GADD45GIP1
CNOT9
STRADA
TBRG4
CNOT8
RPL23
TP53INP1
KIF20B
CDK1
MAGI2
CDC25C

## Sheet: DEGs Group1 vs Group2-TCGA-COAD
Gene_symbol	logFC	adj.P.Val
NNAT	3.47223	4.56985e-92
HIST1H1E	4.42384	5.18294e-90
PRG4	3.07753	6.83367e-90
SDPR	1.90926	1.94449e-88
HIST1H1D	4.27556	3.51052e-82
LRRTM2	2.87492	5.26282e-81
COL14A1	1.93647	4.78855e-78
ANK2	2.02072	2.63836e-77
THSD7A	1.9901	5.68228e-75
ANGPTL1	3.10385	1.34761e-74
FILIP1	1.75908	3.4546e-74
TNS1	1.92206	2.65425e-73
ZEB1	1.53117	3.23627e-73
MYLK	1.88842	5.63843e-72
SYNPO2	2.49715	6.48209e-72
AOC3	1.96751	8.54158e-72
MPDZ	1.70218	2.98731e-71
RNF150	2.13635	6.65479e-71
CNGA3	3.6402	8.81163e-71
AC092881.1	4.0528	9.8295e-71
SPARCL1	1.72336	1.21445e-70
CHRDL1	2.99838	8.92166e-70
TACR1	2.6225	1.15705e-69
GNAO1	2.17199	1.32601e-69
DDR2	1.88155	3.14103e-69
C20orf194	1.5303	4.31575e-69
HIST1H1B	4.26881	5.69758e-68
BNC2	2.00955	1.81299e-67
HIST1H4C	4.30692	2.92214e-67
MYH11	2.81995	9.86049e-67
C1QTNF7	2.27405	3.66249e-66
SLIT3	1.90918	3.82806e-66
C7	2.79042	5.23246e-66
ITPR1	1.27616	9.38124e-66
BOC	1.93756	2.26757e-65
HIST1H3B	4.26527	4.38503e-65
GPR22	4.01137	5.23855e-65
TNXB	2.14159	1.91478e-64
VGLL3	2.25193	2.31502e-64
ABCA6	2.10172	4.76369e-64
MAP1B	1.60413	6.02132e-64
RBMS3	1.52446	1.54903e-63
HIST1H4D	4.11956	3.66551e-63
MEOX2	2.66738	3.81891e-63
NHSL2	2.13601	9.25327e-63
TCF4	1.37453	2.20967e-62
HIST1H4E	3.39464	3.17128e-62
LEP	4.38317	4.29311e-62
PGR	1.99036	6.80774e-62
HIST1H2AI	3.14221	7.01136e-62
AMOTL1	1.61426	1.09221e-61
HSPB8	2.03223	1.38728e-61
LMOD1	2.17653	2.10197e-61
FABP4	3.83665	4.80389e-61
STON1	1.65192	5.2393e-61
IL1R1	1.41151	1.03082e-60
TLL1	2.23404	1.84937e-60
CCDC80	2.07765	1.98729e-60
ZBTB20	2.12386	4.93331e-60
PREX2	1.48111	3.06162e-59
SYNE1	1.53901	6.98644e-59
MAMDC2	2.55779	1.53392e-58
PCDH9	2.45566	4.71758e-58
PLIN1	3.18773	4.82182e-58
MCC	1.39859	5.60992e-58
MYOCD	2.00529	6.76559e-58
BHMT2	1.99462	6.86939e-58
A2M	1.23046	7.39068e-58
LIFR	1.77936	1.25618e-57
ADAMTS1	1.38861	1.28981e-57
CNTNAP1	1.50929	1.69962e-57
ADAMTSL3	2.069	2.05007e-57
ZEB2	1.54358	2.15203e-57
CACNA2D1	1.74526	2.26051e-57
SCN7A	3.11016	2.81974e-57
CADM3	2.72158	6.96463e-57
HIST1H2AJ	3.78321	8.17019e-57
PLN	2.29071	9.20623e-57
HMCN1	1.80095	1.27878e-56
KCNT2	2.03129	2.59516e-56
FIGN	1.71432	3.06754e-56
MGP	1.98099	3.5826e-56
OGN	3.08335	4.91395e-56
PTGIS	2.2591	5.74787e-56
HEG1	1.37904	7.36303e-56
LDB3	2.22366	1.24433e-55
NRXN1	3.13051	1.68237e-55
CILP	2.85399	2.83869e-55
LRCH2	1.70053	5.34872e-55
JAM2	1.5191	6.93885e-55
LRP1B	3.64036	1.37637e-54
PDZRN4	2.61173	1.76441e-54
FGF7	2.02903	2.26379e-54
NECAB1	1.9979	2.72747e-54
SUSD5	2.03354	2.74492e-54
IGF1	2.27091	2.95684e-54
ZFHX4	2.35924	6.70289e-54
ADAM23	1.64813	7.0662e-54
ABI3BP	1.80368	7.36169e-54
PLIN4	3.35455	8.97296e-54
ZNF521	1.43743	1.42521e-53
MSRB3	1.67006	1.48241e-53
ABCA8	2.39567	1.65918e-53
PRELP	2.38175	1.68697e-53
EBF1	1.41431	2.12275e-53
SYNM	2.45142	3.64594e-53
ZNF385D	2.13527	4.43302e-53
SCRG1	2.93425	5.36818e-53
RBPMS2	1.92298	1.08757e-52
SYPL2	1.69962	1.17439e-52
FAM129A	1.54155	1.20584e-52
SLC8A1	1.18138	1.51524e-52
FLRT2	1.75872	2.1461e-52
CRISPLD2	1.38453	3.02172e-52
HIST1H3F	3.78603	3.92681e-52
JAM3	1.06198	4.28911e-52
SFTPC	7.08463	4.41215e-52
CCBE1	2.47215	4.90725e-52
NEXN	1.76304	5.85602e-52
RGAG4	1.47731	7.73706e-52
SV2B	2.12088	7.90456e-52
ATP2B4	1.18053	9.4002e-52
MAP1A	1.46695	1.07746e-51
SVEP1	1.53396	1.26763e-51
FHL1	1.63879	1.69707e-51
ATP1A2	2.78867	2.06504e-51
PTPRM	1.09225	3.58672e-51
EBF3	1.82901	4.44411e-51
SFTPA1	5.615	4.84122e-51
NRP2	1.40578	5.69411e-51
PALMD	1.58515	6.98679e-51
RUNX1T1	1.61568	8.38782e-51
CPEB1	2.01245	8.61933e-51
DNAJB5	1.34528	1.31566e-50
FXYD6	1.62627	1.55918e-50
DCLK1	1.95079	1.68615e-50
SHE	1.31915	2.21269e-50
ABCC9	1.7221	4.29053e-50
FILIP1L	1.18197	4.93745e-50
BCHE	2.52605	5.11454e-50
EVC	1.613	5.46887e-50
NEGR1	1.56428	7.02928e-50
LHFP	1.22821	9.17862e-50
PRICKLE1	1.70358	9.39444e-50
SEMA3G	1.52741	9.7655e-50
AMPH	1.81199	1.23578e-49
FERMT2	1.39351	1.3631e-49
NLGN4X	1.75997	1.64952e-49
HIST1H2BI	4.46627	1.73313e-49
FAM196A	2.14215	2.4314e-49
ANGPTL7	2.96719	2.48703e-49
CALD1	1.45885	2.89173e-49
SFRP1	2.72526	3.48732e-49
GAP43	2.39782	5.7964e-49
LAMA4	1.08007	5.99623e-49
TAS2R30	4.60358	9.68351e-49
FBN1	1.59347	1.28873e-48
MYO5A	1.28751	1.30651e-48
CDO1	2.20819	1.47956e-48
POU5F2	4.1267	1.48005e-48
LYVE1	1.91449	1.48109e-48
PDE2A	1.3631	1.80006e-48
RIC3	2.26967	1.829e-48
MRVI1	1.32298	2.24235e-48
CNTN1	2.50358	2.31252e-48
SLC7A14	3.35344	2.65518e-48
VCAN	1.62554	3.02691e-48
GLI3	1.77686	3.14651e-48
POPDC2	1.58767	3.79986e-48
PCDHB5	1.81342	4.91052e-48
FBXL7	1.27221	5.55637e-48
PLXNA4	1.87783	7.83197e-48
ELOVL2	2.51264	8.08767e-48
DACT3	1.56489	8.13821e-48
HIST1H2AD	2.68352	9.16652e-48
CHL1	1.8779	1.23103e-47
BVES	1.54462	1.31203e-47
SALL2	1.57328	1.37418e-47
FBLN5	1.29263	1.38494e-47
TCEAL2	3.32017	1.47777e-47
OMG	2.49983	2.19494e-47
NLGN1	2.76887	2.60425e-47
NRK	2.61317	3.12384e-47
HIST1H2AM	2.75889	4.60824e-47
BAI3	2.31012	5.69144e-47
ATP8B2	1.26172	8.01323e-47
ABCA9	1.93349	1.17526e-46
SYT11	1.20421	1.32277e-46
PKD2	1.05352	1.52474e-46
CLIP3	1.22946	1.82776e-46
NGFR	2.17058	2.75193e-46
FAT4	1.43436	3.65613e-46
EVC2	1.41026	3.77326e-46
NAP1L3	1.65233	4.47797e-46
IGFBP5	1.53985	4.526e-46
MEIS1	1.4594	4.89791e-46
AC016549.1	4.29261	6.85438e-46
FAM107A	1.56578	6.86573e-46
AKT3	1.37425	6.99231e-46
ARHGEF25	1.35873	7.66529e-46
HIST1H2BO	3.15448	8.49921e-46
PCSK2	3.45238	8.84665e-46
PYGM	1.8295	9.95651e-46
STEAP4	1.95145	1.07604e-45
LTBP2	1.44775	1.13184e-45
DOK6	1.47399	1.37205e-45
PEG3	1.7459	1.45353e-45
MAP6	1.56923	1.90537e-45
GPIHBP1	2.07025	2.2124e-45
SLIT2	1.96835	2.2263e-45
LONRF2	2.79148	3.6736e-45
HIST1H2AH	3.43916	4.0186e-45
PKNOX2	1.69285	5.53498e-45
RASSF2	1.27018	5.86485e-45
NR3C1	1.29039	6.05847e-45
KCNB1	2.5811	1.55402e-44
HIST1H2BF	2.95894	1.79569e-44
MEF2C	1.20373	1.93033e-44
ZDHHC15	1.67062	2.2678e-44
S1PR1	1.1262	2.2812e-44
SGCD	1.62606	2.5135e-44
ZNF154	1.30673	3.26107e-44
SETBP1	1.37881	4.20342e-44
THBS4	2.71055	5.38744e-44
JPH2	1.88095	7.07644e-44
CHRNA3	1.99588	9.1425e-44
LRRC4C	2.29789	1.10385e-43
CLIP4	1.54711	1.23316e-43
DLC1	1.09729	1.28419e-43
TSHZ3	1.26319	1.31533e-43
DZIP1	1.19858	1.38487e-43
KCNE4	1.39239	1.99663e-43
BEND6	1.73626	2.26925e-43
RNF180	1.54206	2.61394e-43
CD93	1.16441	2.79758e-43
GPRASP1	1.32952	2.9099e-43
HAND2	2.32116	3.06423e-43
LDB2	1.06157	3.38658e-43
GUCY1A3	1.54689	3.91422e-43
ZFPM2	1.61353	6.80644e-43
RELN	2.13916	7.16247e-43
ZNF667	1.39681	1.04102e-42
TUSC5	4.58592	1.07443e-42
C8orf88	1.78965	1.0799e-42
EFEMP1	1.60531	1.17384e-42
GAS7	1.2962	1.21029e-42
COL8A1	1.74751	1.23521e-42
KCNMB1	1.85948	1.23679e-42
MYOM1	1.51739	1.57469e-42
CYP7B1	1.68031	1.76302e-42
DAAM2	1.17632	4.25622e-42
PCDH7	1.54835	4.30466e-42
ADCYAP1R1	2.60549	5.90083e-42
HTR2B	2.32837	5.92913e-42
PAK3	1.76498	6.03844e-42
JPH4	1.7666	6.30785e-42
TEK	1.17518	1.58002e-41
FNDC1	1.94212	2.29448e-41
TP63	2.50995	2.34398e-41
THBS1	1.25652	2.57874e-41
PABPC5	1.46761	2.58867e-41
NEFH	1.4852	3.05817e-41
MOXD1	1.47078	3.30199e-41
SORCS1	2.37629	3.53916e-41
ST8SIA1	1.3353	4.39044e-41
CDK14	1.48096	4.49451e-41
TMEM200B	1.40737	4.96927e-41
OSMR	1.31508	5.02513e-41
ALDH1A3	1.28136	5.04755e-41
FAM13C	1.37492	5.12615e-41
KLHL4	1.68355	5.57561e-41
PRIMA1	2.66464	6.13384e-41
ERG	1.15156	6.39441e-41
BNC1	3.13748	6.6679e-41
RP11-437B10.1	2.12673	7.49042e-41
TAGLN	1.62569	9.66803e-41
PDZD4	1.71693	1.05184e-40
RHOJ	1.13854	1.22271e-40
PPP1R12B	1.31214	1.2426e-40
HIST1H3A	3.11945	1.26232e-40
CHRDL2	2.64739	1.40693e-40
DPYSL3	1.45325	1.9162e-40
ADAD2	3.25161	2.67161e-40
CHRM2	3.52367	2.89004e-40
NUDT10	1.92472	3.00375e-40
GALNT15	1.74002	3.11281e-40
SSC5D	1.76182	3.4366e-40
CNN1	2.11022	3.91998e-40
NPTX1	2.53628	4.0585e-40
COL6A3	1.46388	5.1526e-40
SORCS2	1.43547	6.48936e-40
VSTM4	1.23016	6.68039e-40
ADAM12	1.9071	7.59769e-40
KRT5	4.11996	8.6945e-40
ASTN1	2.94357	9.39774e-40
C5orf58	2.41879	1.04776e-39
PLXDC2	1.48238	1.15226e-39
PIEZO2	1.50379	1.22446e-39
ITGB3	1.29223	1.27276e-39
HSPB7	2.12946	1.36441e-39
BACH2	1.72285	1.38189e-39
HIST1H2BE	3.00671	1.75674e-39
PALM2-AKAP2	1.76144	1.94699e-39
SCN2B	2.23901	2.11213e-39
MFAP4	1.56809	2.4066e-39
TSHZ2	1.66045	2.51289e-39
CYP1B1	2.2318	3.50489e-39
DOCK10	1.22482	3.88616e-39
QKI	1.22209	4.24613e-39
KCNMA1	1.84929	4.38587e-39
FAT3	1.80151	6.48659e-39
FAM216B	2.912	7.86326e-39
LOXL4	1.41158	8.34547e-39
STOX2	1.49914	1.03706e-38
PECAM1	1.0141	1.1323e-38
HIST2H2AB	3.54772	1.36671e-38
PCDHB6	1.96972	1.63054e-38
TMTC1	1.38159	1.69722e-38
CASQ2	2.81671	1.82757e-38
C1S	1.28656	1.94201e-38
FGF10	1.7932	1.9564e-38
AGTR1	2.54115	1.96469e-38
ZNF677	1.29175	2.24266e-38
AC069063.2	4.43985	2.43669e-38
FLI1	1.0905	2.51791e-38
GPC6	1.4358	2.70566e-38
CCDC8	1.45364	2.86433e-38
MYOZ3	1.61527	4.1518e-38
LRRN3	2.03402	4.45566e-38
KIAA1462	1.35983	6.0581e-38
CXorf36	1.05949	6.57281e-38
TENM4	1.55628	6.66308e-38
ADAMTS16	2.04959	7.05474e-38
MAB21L2	1.74175	7.11685e-38
CLMP	1.41935	7.29933e-38
AKAP12	1.77713	9.01215e-38
GEM	1.1161	9.32281e-38
KIAA1644	1.70966	9.80487e-38
HIST1H2AL	3.23603	1.1558e-37
LTBP1	1.13327	1.25812e-37
MLLT11	1.02347	1.29362e-37
PPFIA2	1.67333	1.32442e-37
CD36	1.80867	1.41974e-37
TIMP2	1.25256	1.51316e-37
ADAMTS3	1.32194	1.61454e-37
ZNF460	1.7647	2.17244e-37
MRGPRF	1.47658	2.35626e-37
WIPF1	1.06558	3.09306e-37
ZBTB16	2.42788	3.70979e-37
FZD4	0.883893	3.71355e-37
ZNF229	1.54995	4.70235e-37
SYNC	1.55125	4.91179e-37
TSPYL5	1.27226	5.11672e-37
DGKI	1.69884	5.20494e-37
MYOC	3.56985	5.28036e-37
HIST1H2BL	2.50955	5.37172e-37
HIST2H2BF	2.08901	5.6564e-37
ATP1B2	1.45912	6.38821e-37
CAND2	1.16864	7.53091e-37
KCNN3	1.17611	1.03849e-36
METTL24	1.83687	1.07096e-36
FRMD6	1.36955	1.16248e-36
PTGER3	1.62372	1.20443e-36
CNTN4	1.36946	1.35081e-36
TRPS1	1.5293	1.54907e-36
CHST8	2.94142	1.6839e-36
TAS2R13	3.87345	1.84078e-36
RORA	1.2586	1.85805e-36
HIST1H4L	4.4507	3.15736e-36
ECM2	1.52715	3.15858e-36
TCEAL5	2.77609	3.42396e-36
LPP	0.910587	3.42571e-36
CDH19	2.69055	3.48999e-36
CLDN11	1.74344	3.51473e-36
LPHN2	1.17949	3.90904e-36
MAN1C1	1.12806	5.89745e-36
HIST1H4B	3.448	6.50229e-36
MYCT1	1.0875	7.1277e-36
LRFN5	1.73639	7.14435e-36
PRSS48	3.35484	7.92427e-36
TUB	1.52361	9.23229e-36
FBXO40	4.92488	1.25511e-35
SULF1	1.56747	1.34454e-35
TTC28	1.10857	1.34847e-35
RBMS1	1.23887	1.41835e-35
KANK2	0.86655	1.52768e-35
COLEC12	1.6512	1.73884e-35
CCDC88A	1.34537	2.10401e-35
ARHGEF6	1.09791	2.42597e-35
TMEM59L	2.01004	2.59256e-35
RORB	2.19973	3.02183e-35
CDR1	3.92518	3.17402e-35
SYT15	1.72965	3.54003e-35
GIMAP8	1.10422	3.74284e-35
HMP19	2.33855	4.01143e-35
CXCL12	1.34977	4.45234e-35
MYL9	1.41648	4.69577e-35
ETS1	1.01786	4.83214e-35
ZNF385B	2.27533	5.00628e-35
MMRN2	1.01502	5.7853e-35
GPR116	1.03919	5.82977e-35
ATCAY	2.44624	7.98495e-35
GREM1	1.73868	9.164e-35
PRDM6	1.51529	9.46266e-35
SVIL	0.836936	1.0848e-34
CCL19	2.21568	1.43934e-34
NEFM	2.09963	1.4653e-34
RECK	0.984814	1.47807e-34
INHBA	1.51795	1.49932e-34
PSD	1.49141	1.59068e-34
EGR2	1.45274	1.63932e-34
PABPC4L	1.42053	1.65175e-34
NAP1L2	1.87253	2.05001e-34
SOX5	1.49907	2.55329e-34
ACTG2	2.06513	2.62257e-34
CTGF	1.19495	3.88153e-34
FSTL1	1.06016	4.49842e-34
ACTA2	1.30254	4.50876e-34
ZNF366	1.29622	5.1014e-34
ENOX1	1.21432	5.44503e-34
BASP1	1.25246	5.54723e-34
HIST1H2AB	3.3388	6.37196e-34
BCAT1	1.59992	7.72521e-34
CYR61	1.33707	1.20463e-33
RFTN1	0.931192	1.22691e-33
CPXM2	1.68141	1.47912e-33
GJA5	1.1882	1.53161e-33
DIXDC1	0.822123	1.64174e-33
KIF5A	1.70654	1.64397e-33
ADAMTS18	1.91305	1.65265e-33
FAM198A	1.65004	1.77146e-33
PDE7B	1.23697	1.7933e-33
MMP16	1.40177	1.89972e-33
PXDN	1.17009	1.93566e-33
LSAMP	1.33757	1.97535e-33
ANTXR1	1.46377	2.20992e-33
GNB4	1.19972	2.75552e-33
CCDC144A	3.07823	3.27827e-33
ELOVL4	1.24236	3.65316e-33
SDK1	1.45116	3.66435e-33
ZIK1	1.06154	3.99113e-33
DYNC2H1	1.39401	5.10921e-33
POU2F2	1.20302	5.1605e-33
THSD7B	2.73345	5.23053e-33
ZNF532	1.03968	5.33252e-33
DLG2	1.38364	5.43103e-33
GJC1	1.14646	5.87547e-33
ABCA1	1.07486	5.8771e-33
ZNF676	2.2326	6.43996e-33
HIST2H2AC	1.99265	7.00829e-33
PYGO1	1.57526	7.31397e-33
PI16	2.46878	8.10848e-33
LZTS1	1.12657	8.2454e-33
HIST1H2BM	3.43492	9.8976e-33
MRPL37	-0.614759	1.57426e-32
CSGALNACT2	0.84078	1.69878e-32
SV2A	1.17298	1.87619e-32
ARHGAP20	1.48225	1.91746e-32
DSEL	1.36807	2.04093e-32
C1R	1.14206	2.19716e-32
CLVS2	2.73643	2.26635e-32
MUSK	2.05362	2.28678e-32
MAP2	1.68626	2.31667e-32
SCN9A	1.71053	2.3769e-32
MASP1	2.2398	2.60307e-32
IQCA1	1.53474	2.75416e-32
MMP19	1.19313	2.94641e-32
MAGEL2	1.65632	3.11052e-32
LRRK2	1.71235	3.29264e-32
P4HA3	1.41675	3.54548e-32
BCL6B	1.02993	3.66233e-32
MAF	1.05425	3.82305e-32
NOVA1	1.86467	3.89771e-32
TRPC1	1.23605	3.97368e-32
VASH1	0.946856	4.14096e-32
GPR18	1.77062	4.31352e-32
ST8SIA3	3.08957	4.32007e-32
COL8A2	1.44516	4.40972e-32
KCNAB1	1.25036	4.95739e-32
PHYHIP	1.58651	5.5272e-32
CRYAB	1.39138	5.6356e-32
STMN4	2.30192	6.22047e-32
HIST1H2BB	4.94024	6.34942e-32
EFS	1.11664	7.67224e-32
MYH10	1.20178	7.89243e-32
KIAA2022	2.24641	8.47028e-32
PLP1	2.36431	8.66561e-32
FAM195A	-1.09794	8.90083e-32
SORBS1	1.25461	9.13466e-32
ADH1B	2.59868	9.77057e-32
COL12A1	1.33206	1.04304e-31
PDLIM3	1.35963	1.35311e-31
CD34	0.880909	1.48278e-31
COL5A2	1.30906	1.52562e-31
KIAA1045	1.87385	1.57629e-31
PNMAL1	1.49383	1.67245e-31
PRL	2.42547	1.69976e-31
FBXO32	1.1111	1.74877e-31
LMO3	1.98152	1.79208e-31
FAM49A	1.2066	1.92895e-31
MN1	1.38781	2.06145e-31
PHOX2B	2.73725	2.13956e-31
CTD-2207O23.3	2.48048	2.45329e-31
SFMBT2	1.22212	3.72122e-31
SCN11A	1.84053	3.72142e-31
HTR2A	1.73307	4.03228e-31
SCN4B	1.24325	4.14369e-31
AFF3	1.56023	4.61747e-31
EVL	1.01904	5.0369e-31
AOX1	1.55941	5.57064e-31
SRSF12	1.78783	5.68156e-31
PHLDB2	1.38315	5.81548e-31
EPHA6	2.50259	6.35041e-31
ANKRD6	1.23837	7.40095e-31
PRICKLE2	1.16711	8.82706e-31
KIRREL	0.966608	8.8385e-31
SGIP1	1.16146	9.49137e-31
ZNF208	1.64409	9.90118e-31
C4B	1.50588	1.25934e-30
GIMAP7	1.08712	1.2652e-30
SPEG	1.77334	1.27039e-30
SLC5A7	2.68366	1.30546e-30
MITF	1.27023	1.41405e-30
CYP27C1	1.49849	1.41653e-30
FGFR1	1.11189	1.5654e-30
PMP2	2.60663	1.68492e-30
GLIS2	1.15756	1.70609e-30
OLFML1	1.09216	1.70669e-30
AKAP6	1.16129	1.77418e-30
HGF	1.24871	1.8016e-30
RAB3C	1.97458	1.87279e-30
MRC2	1.19727	1.91051e-30
CNTN2	2.31274	1.96053e-30
RNF175	1.56998	2.17931e-30
ATP8A2	1.25736	2.28544e-30
PENK	2.77979	2.39757e-30
PNMAL2	1.3316	2.56355e-30
ATRNL1	1.9779	2.58503e-30
LAMC1	0.684977	2.83558e-30
COX5A	-0.754372	2.96427e-30
HSD17B6	1.1187	3.01001e-30
NALCN	2.05107	3.13569e-30
CALCRL	1.13072	3.20387e-30
FAM110B	1.24866	3.2598e-30
CMYA5	1.10747	3.78461e-30
DPY19L2	1.71568	3.88727e-30
CFH	1.2331	4.23871e-30
FIBIN	1.31774	4.29658e-30
TMEM14E	4.16953	4.40571e-30
UQCRQ	-0.952777	4.43619e-30
ANKS1B	1.74364	4.44246e-30
C2orf40	2.19514	5.08306e-30
TGFB3	1.51951	5.12276e-30
GNG2	0.988785	5.20968e-30
SHC4	1.26707	5.79473e-30
DPP6	2.21354	6.48428e-30
FAM65B	1.30086	6.8591e-30
C3	1.67522	7.19473e-30
TRPC4	1.1568	7.27361e-30
MEDAG	1.52434	8.10582e-30
COL5A1	1.24461	8.92455e-30
HEYL	0.922183	9.63721e-30
NRP1	1.08507	1.04956e-29
OMD	2.41661	1.25627e-29
CTB-133G6.1	1.48891	1.26105e-29
PPP2R2B	1.43982	1.27824e-29
ARL10	1.07023	1.33932e-29
SCHIP1	1.3851	1.4179e-29
AKAP2	1.33727	1.45428e-29
CYYR1	0.93947	1.49353e-29
ACKR1	1.8397	1.50242e-29
COX5B	-0.926034	1.531e-29
ANGPTL3	2.39074	1.63551e-29
SPG20	1.18257	1.66032e-29
ERICH3	3.06103	1.73335e-29
JAZF1	0.992158	1.78095e-29
ITGA5	1.17304	1.91768e-29
SELP	1.66337	2.23368e-29
LRRC55	1.56051	2.28573e-29
COL15A1	1.21444	2.30603e-29
PTRF	1.02715	2.8253e-29
COLEC10	1.95333	2.88883e-29
EBF2	1.69832	2.97853e-29
FAM180A	1.64191	3.03393e-29
FOXN3	0.712882	3.20461e-29
GPR133	1.48761	3.40373e-29
ENTPD1	0.659613	3.45901e-29
FAM196B	2.1589	3.47837e-29
PDGFRA	1.10756	3.59304e-29
VIM	0.971404	3.59602e-29
ANKRD44	0.893979	4.31608e-29
ARHGAP31	0.955862	4.64344e-29
KCNA1	2.84404	4.77353e-29
SPOCK1	1.77079	4.9234e-29
KRT14	4.35039	4.98965e-29
BICC1	1.21173	5.16465e-29
MRAS	1.12571	5.4001e-29
TAS2R50	3.34837	5.90069e-29
NACA2	-2.34454	6.07777e-29
VCAM1	1.14908	6.12156e-29
ARHGEF15	0.956711	6.22478e-29
PRKD1	1.26773	6.37223e-29
PNMT	2.50216	7.0031e-29
GAS1	1.89995	7.57958e-29
TFAP2B	5.34996	7.67665e-29
STON1-GTF2A1L	2.29423	7.93676e-29
MAPK10	1.19986	8.08106e-29
THRSP	2.57121	8.08704e-29
SLITRK3	2.78465	8.09322e-29
KRT78	3.84714	8.41982e-29
ARHGAP36	3.27086	8.5632e-29
ITIH5	1.19022	8.87043e-29
PZP	2.09193	9.09786e-29
COL4A2	0.927164	9.47328e-29
CDH11	1.21541	9.50602e-29
PDGFRB	1.05228	1.04225e-28
RGS4	1.68	1.05189e-28
NOS1	2.38483	1.15383e-28
TAS2R46	3.21105	1.17341e-28
CRISPLD1	1.37496	1.18253e-28
CRMP1	1.07464	1.22778e-28
GRIK5	1.58231	1.33007e-28
SLC9A9	1.11499	1.36059e-28
ATP8B4	1.07906	1.38241e-28
PLA2G5	1.54238	1.48424e-28
MRAP	2.56847	1.5602e-28
GFRA1	1.65763	1.66811e-28
WSCD2	2.19887	1.74945e-28
FGF5	2.21131	2.1804e-28
NBEAL1	0.99768	2.3197e-28
CHST11	1.14106	2.43136e-28
GIMAP5	1.35875	2.55337e-28
MMP2	1.29449	2.64294e-28
TNC	1.55697	2.68951e-28
FAM129C	1.98645	2.69224e-28
NUAK1	1.01796	2.74861e-28
CFAP54	1.5103	2.8237e-28
PDE1A	1.2092	2.90932e-28
COL3A1	1.34248	3.03047e-28
SLC4A10	2.36494	3.06326e-28
PBOV1	3.64493	3.35751e-28
ADAMTS5	1.10559	3.52624e-28
MRPL22	-0.717956	3.57026e-28
NACAD	1.16636	3.7811e-28
DPT	1.75828	4.1169e-28
TMEM130	1.63241	4.77025e-28
ITGA7	1.05642	5.0077e-28
CDH5	0.943193	5.678e-28
ARPC5L	-0.563911	5.83341e-28
IGDCC3	3.14648	5.85939e-28
EMILIN1	1.13114	6.06455e-28
ARMCX1	1.09879	6.52924e-28
SSPN	1.12353	6.5905e-28
PLXNC1	1.12378	7.01416e-28
CCDC178	1.75574	7.17927e-28
SMIM10	1.21558	7.81004e-28
C14orf2	-0.749529	8.35132e-28
RASGRP2	1.15889	8.54139e-28
ADCYAP1	1.92853	8.82725e-28
CYS1	1.28998	9.11257e-28
NCAM2	1.55169	9.77911e-28
LCA5	1.01823	9.85848e-28
PDZD2	1.05391	9.96452e-28
ADIPOQ	4.63931	1.00022e-27
FMO2	2.15259	1.07599e-27
EMCN	1.05848	1.11908e-27
IL6ST	0.765496	1.13354e-27
PTN	1.19245	1.13403e-27
CCDC69	1.05672	1.19693e-27
ABCB5	2.48278	1.21228e-27
SNX29	0.633373	1.27681e-27
NDUFS3	-0.642591	1.31518e-27
ANXA8	3.26624	1.36525e-27
COL4A1	0.91996	1.46331e-27
HIST1H3C	2.79909	1.52309e-27
HSPB6	1.93788	1.54221e-27
SERPINB13	5.6004	1.66822e-27
ELAVL4	1.6458	1.74592e-27
DENND5A	0.781795	1.83766e-27
TIE1	1.01526	2.16916e-27
ADD2	1.92046	2.44062e-27
NDUFAB1	-0.690053	2.87569e-27
NBEA	1.65656	2.99086e-27
KCTD4	2.48914	3.42626e-27
CRCT1	4.64465	3.92147e-27
PRKG1	1.0746	4.00989e-27
SERPINE1	1.47648	4.0976e-27
FAM124B	1.25086	4.34785e-27
IFNK	4.54153	4.36885e-27
UQCRHL	-1.08593	4.90584e-27
GGT5	1.13036	4.91246e-27
FGF1	1.35331	6.003e-27
OLFML2B	1.17259	6.93807e-27
F2R	0.819777	7.76663e-27
CSDC2	1.54948	8.38381e-27
LAMTOR5	-0.649832	9.31991e-27
LSM2	-0.726037	9.39556e-27
FNBP1	0.812438	9.74672e-27
NPR1	1.11327	1.01347e-26
GDF5	2.17194	1.09808e-26
AEBP1	1.38405	1.10803e-26
SERPINF1	1.08613	1.22543e-26
ASPA	1.4855	1.3607e-26
KLHL5	0.963136	1.44962e-26
GLT8D2	1.09952	1.69029e-26
ESR1	1.44764	1.74719e-26
HIST1H2BG	1.83534	1.80155e-26
PODN	1.2919	1.83189e-26
NCAM1	1.38317	1.94533e-26
FAM43B	1.77754	2.10328e-26
GPM6A	2.55185	2.93436e-26
TTBK2	0.779511	3.20605e-26
STARD8	0.939383	3.26947e-26
NXPE3	0.816337	3.72411e-26
SERPING1	1.17813	3.86873e-26
WISP1	1.22137	4.50727e-26
KCNJ9	2.153	5.35612e-26
PCDHGA12	1.30831	5.54e-26
LRRC8C	0.929215	5.59731e-26
CTAG2	4.77592	5.80001e-26
HECW1	1.3881	6.06303e-26
MXRA5	1.3843	6.41179e-26
GALNT16	1.6204	6.99919e-26
RCAN2	0.953248	7.00562e-26
CHGB	2.80823	7.23252e-26
ZNF626	1.24292	7.64063e-26
PDGFC	1.13454	8.19225e-26
SGCA	1.74247	8.27073e-26
GREM2	1.87171	8.3639e-26
F13A1	1.62704	8.70005e-26
TAGLN3	2.17596	9.10784e-26
SYT4	2.65959	9.73075e-26
PTPN14	0.879162	1.04803e-25
PTPLAD2	0.999226	1.10301e-25
ARHGEF17	0.908484	1.10388e-25
SPINT4	4.04434	1.13428e-25
CNTNAP3	1.74569	1.14125e-25
KRT6A	3.09886	1.19676e-25
C9orf84	2.38008	1.19941e-25
CAMK4	1.09972	1.28256e-25
ITGA4	1.03774	1.43308e-25
EHD2	1.05295	1.45515e-25
SLC9C1	1.78141	1.47505e-25
NPRL2	-0.672326	1.53629e-25
ZNF354C	1.31911	1.54524e-25
DST	0.90431	1.66687e-25
COX7B2	4.51431	1.85297e-25
AFAP1L1	0.870649	1.95549e-25
CLEC14A	0.848944	2.16939e-25
MACF1	0.74326	2.1772e-25
NCCRP1	2.24516	2.20641e-25
TAS2R43	2.85844	2.22295e-25
SSTR2	1.18297	2.36386e-25
COX4I1	-0.753719	2.4191e-25
KIAA1755	1.01384	2.75951e-25
HIVEP2	0.640352	2.78682e-25
GDF7	1.45825	2.78938e-25
RGMA	1.4945	2.79015e-25
POLR2H	-0.585095	3.0218e-25
MGAT4C	2.53233	3.35477e-25
NDUFA12	-0.624768	3.49232e-25
ATP6V1G2	1.06363	3.56628e-25
TNR	1.7669	3.57777e-25
C19orf43	-0.634213	3.58503e-25
FCER2	2.28831	3.63474e-25
MFAP5	1.75296	3.71575e-25
RCSD1	0.971772	3.72095e-25
FN1	1.57047	3.84041e-25
ANGPTL2	1.15363	3.84217e-25
ZNF512B	0.992774	3.99297e-25
KCNK2	2.10338	4.23112e-25
C4A	1.44131	4.9797e-25
ZNF135	1.21566	5.21199e-25
PALLD	0.863066	5.3695e-25
PTH1R	1.47759	7.34536e-25
THBS2	1.58218	7.52881e-25
HIST1H2BC	1.69974	7.73453e-25
CHRND	3.52532	7.78727e-25
PKHD1L1	1.73599	8.00733e-25
DYSF	0.919095	8.46658e-25
ADAMTSL1	1.20881	1.00077e-24
CFL2	0.979067	1.02338e-24
CHCHD1	-0.604669	1.03849e-24
TSC22D3	0.869436	1.0431e-24
C10orf113	3.09478	1.0474e-24
UTS2B	2.34392	1.13291e-24
ECHS1	-0.658203	1.27433e-24
ZNF728	2.30081	1.31543e-24
DACH2	2.54696	1.31603e-24
GIMAP1	0.972054	1.37379e-24
COL19A1	2.16551	1.3806e-24
HSPG2	1.03335	1.42598e-24
ELN	1.25369	1.65596e-24
BMPR2	0.704359	1.73311e-24
ICT1	-0.656315	1.91137e-24
FHL5	1.13176	2.01271e-24
WNK3	1.17622	2.09777e-24
RASL12	0.926137	2.13344e-24
COMTD1	-1.20607	2.18532e-24
BBOX1	2.31086	2.25486e-24
KIAA0408	2.13384	2.2717e-24
DOCK2	1.16952	2.35661e-24
DES	2.36009	2.42986e-24
PRPH	1.79749	2.6039e-24
TCEAL7	1.19416	2.68308e-24
ADHFE1	1.10768	2.76089e-24
WDFY4	1.2093	2.77019e-24
C1QBP	-0.851763	2.85537e-24
PPP1R17	4.06939	2.91294e-24
LAMA2	1.32424	2.97127e-24
DIRC3	1.52436	3.0164e-24
MSN	0.869333	3.19073e-24
IL7R	1.24776	3.37263e-24
COL1A2	1.27363	3.64884e-24
TAL1	1.04106	3.85865e-24
FNDC9	1.78165	3.91992e-24
ZNF454	1.22156	3.9495e-24
PAPPA	1.28392	4.26598e-24
SPC24	-0.741975	4.71001e-24
NID1	0.868772	4.73688e-24
BSPRY	-0.729123	4.80877e-24
SGCE	1.06714	4.87223e-24
COL24A1	1.49498	5.53033e-24
NR4A3	1.43409	5.58086e-24
CTD-2192J16.22	-2.5027	5.86793e-24
MRPL41	-1.07211	6.85717e-24
VWF	1.0304	7.1589e-24
POP5	-0.650573	7.18563e-24
UNC5C	1.0112	7.20286e-24
TNNT3	2.11392	7.47206e-24
C2orf74	1.275	7.83791e-24
JAKMIP2	1.36024	7.93614e-24
DFNA5	1.18776	8.03516e-24
TMEM100	1.54394	8.09854e-24
C3orf80	1.184	8.29607e-24
RPS15	-0.942217	8.8975e-24
EPHA3	1.26583	8.9703e-24
GPR88	1.74815	9.00943e-24
COX7A2	-0.714596	9.03681e-24
PRPH2	1.12313	9.11848e-24
NDUFA2	-0.713794	9.82827e-24
TNFSF8	1.27441	9.9275e-24
ANXA8L1	2.02255	1.02301e-23
ATP5C1	-0.576587	1.04086e-23
LHX3	3.50136	1.04331e-23
CTNNA3	1.96164	1.05536e-23
GPR124	0.96304	1.27841e-23
GSTM5	1.15834	1.30508e-23
CCDC184	1.078	1.4081e-23
MMAB	-0.685809	1.41857e-23
TRDN	3.32505	1.45834e-23
NOX4	1.3676	1.50455e-23
RERG	1.35628	1.51765e-23
RHOQ	0.642766	1.56339e-23
SERTM1	3.03578	1.5736e-23
RAB31	1.16647	1.62724e-23
FAM168A	0.480542	1.63202e-23
DSE	1.05742	1.73538e-23
RNF17	2.71956	1.83997e-23
CCR7	1.34814	1.89621e-23
FRMPD4	2.52716	1.95014e-23
UQCRC1	-0.815434	1.97852e-23
ELTD1	0.919634	2.02792e-23
PRKCB	1.25983	2.09982e-23
NLRP1	1.08154	2.17321e-23
MRPS34	-0.852348	2.21445e-23
NGB	2.75524	2.22531e-23
TCEAL3	0.945195	2.23885e-23
REL	0.82294	2.31874e-23
HINT1	-0.675193	2.47851e-23
FH	-0.572986	2.65233e-23
RAI14	0.814073	2.75218e-23
CMTM5	2.10386	2.84301e-23
PHF21A	0.468612	2.96699e-23
ISM1	1.67954	3.19607e-23
SAMD4A	0.869583	3.24848e-23
KDR	0.797614	3.30133e-23
GPR82	1.39471	3.34362e-23
RGS7BP	1.38296	3.34391e-23
RASGRP3	0.88439	3.38826e-23
WWTR1	1.07972	3.46811e-23
AQP4	2.69345	3.60542e-23
THBD	0.839901	3.74789e-23
ZNF831	1.43533	4.15019e-23
CPZ	1.2233	4.21049e-23
CLDN6	2.65136	4.30102e-23
CMA1	2.33538	4.49299e-23
P2RY8	1.03885	4.63313e-23
PCDH17	0.948646	4.9204e-23
PCDH12	0.772956	5.00907e-23
SNCA	1.36163	5.07335e-23
CLEC3B	1.06858	5.22365e-23
COQ9	-0.560443	5.36083e-23
GPR52	3.10335	5.48448e-23
KCNK3	1.97136	5.52454e-23
KRT222	1.92114	6.33632e-23
TCF7L1	0.739025	6.35015e-23
SPRR2E	4.25607	6.90105e-23
S1PR3	0.975475	7.08514e-23
PCNX	0.585618	7.0867e-23
CASQ1	1.46437	7.26286e-23
VEGFC	1.0019	7.44265e-23
FP325317.1	2.66489	7.5074e-23
MRPL11	-0.669434	7.79239e-23
SLC22A17	1.02022	8.05857e-23
FAM63B	0.843782	8.19102e-23
NDUFS6	-0.774084	8.22348e-23
ZDHHC22	2.89104	8.71109e-23
RP11-248J23.6	1.99628	8.90097e-23
TCTEX1D1	1.13816	9.12367e-23
TAS2R31	1.99329	9.22015e-23
SNRPF	-0.69216	9.33479e-23
AC105009.1	2.33373	9.90582e-23
CT45A1	5.8234	1.05569e-22
GRIN2A	2.06806	1.09087e-22
LYNX1	1.32869	1.10173e-22
BHLHE22	1.17384	1.12523e-22
CYBRD1	1.10774	1.12941e-22
TMEM119	1.02947	1.15564e-22
MAB21L1	1.79241	1.19016e-22
TRAF3IP3	1.09338	1.24187e-22
EPHA7	2.02373	1.26072e-22
AURKAIP1	-0.69849	1.26786e-22
FBLN1	1.2686	1.28157e-22
HHIPL1	1.12264	1.31792e-22
DOK5	1.20414	1.34785e-22
GUCY1B3	0.968862	1.35017e-22
GJA1	0.936233	1.38974e-22
PHB2	-0.64418	1.40574e-22
RUNX2	1.02615	1.44353e-22
MCAM	0.763837	1.52073e-22
FAP	1.40979	1.54387e-22
DOCK4	0.982111	1.56209e-22
RPL29	-0.695963	1.64761e-22
GFPT2	1.46672	1.72289e-22
RASSF8	1.23122	1.80218e-22
ADRB3	2.31799	1.89681e-22
CR1	1.62616	2.12693e-22
SFTPD	1.92114	2.32215e-22
CSF2RB	1.20452	2.32485e-22
KLF9	0.951336	2.47557e-22
ZNF365	1.66663	2.49035e-22
RER1	-0.513669	2.61796e-22
H2AFZ	-0.63213	2.64423e-22
DCHS1	0.914176	2.75378e-22
MYEOV2	-0.721173	2.97304e-22
KRT6C	3.02382	3.14692e-22
FAT2	1.51998	3.8178e-22
CEP170	0.963776	3.90672e-22
MAP3K3	0.545695	3.91538e-22
PLEKHO1	0.840437	3.99139e-22
EMC8	-0.524886	4.45836e-22
IL10RA	1.06552	4.8237e-22
SPOCK3	2.7478	4.94013e-22
VPS13B	0.628281	5.16716e-22
ADAMTS6	1.0933	5.65429e-22
ADAM20	2.18108	5.68076e-22
GIMAP4	0.950732	5.82876e-22
GOT2	-0.503485	6.03028e-22
SFRP2	2.06787	6.04709e-22
SMARCA1	1.16914	6.09007e-22
MEF2A	0.514621	6.13516e-22
ATXN1	0.667642	6.23519e-22
FRRS1L	1.91543	6.47439e-22
ITGA11	1.28424	6.63706e-22
EML1	0.979783	6.72619e-22
ZCCHC24	0.989038	6.75419e-22
FBXL22	0.88657	6.83736e-22
FSTL5	2.60093	7.03602e-22
FST	1.31492	7.24811e-22
MCAT	-0.63285	7.30808e-22
HCLS1	0.945084	7.72071e-22
C16orf13	-0.874032	8.087e-22
LSM4	-0.576326	8.28908e-22
NID2	0.934121	9.8367e-22
WISP2	2.04254	1.01123e-21
PSMG3	-0.658229	1.01199e-21
C9orf47	1.66462	1.04539e-21
CLEC1A	0.951949	1.05039e-21
FLG	1.83407	1.13322e-21
COX7B	-0.788934	1.18082e-21
RNF126	-0.724642	1.22284e-21
PSMB7	-0.49085	1.22349e-21
KCNH1	1.28521	1.25684e-21
PGAM5	-0.610402	1.30665e-21
PRND	1.84374	1.32976e-21
ZNF781	1.07199	1.36027e-21
CD22	1.65563	1.42325e-21
TXN2	-0.597462	1.43238e-21
ARHGAP25	0.898061	1.56329e-21
COL18A1	0.921761	1.61159e-21
CC2D2B	1.7514	1.82188e-21
FAM171B	1.08341	1.89568e-21
KCNS2	1.80069	2.2537e-21
CDH2	1.48927	2.38765e-21
FYB	1.18944	2.45057e-21
ATP6V0B	-0.758841	2.47498e-21
ELK3	0.67754	2.62763e-21
TIMM8B	-0.808554	2.68948e-21
NOTCH2NL	1.63833	2.82628e-21
EFNB3	1.15131	2.82869e-21
CER1	3.03746	2.92833e-21
IVL	3.8059	2.99399e-21
RSPO1	1.77668	3.06624e-21
RARB	0.93134	3.23788e-21
TESPA1	1.1524	3.28517e-21
PPP1R18	0.758689	3.33331e-21
RPL35	-0.787389	3.37795e-21
ZNF483	1.55578	3.50966e-21
ISLR2	1.30404	3.53695e-21
CD84	1.27192	3.89745e-21
LRRC32	0.832644	3.98182e-21
ZNF568	1.10986	4.02566e-21
SYT16	1.96899	4.0368e-21
FGF14	1.73194	4.11788e-21
COQ4	-0.623321	4.15002e-21
MAP3K12	0.722255	4.25969e-21
KIF9	-0.629924	4.31366e-21
ZBED6	1.22399	4.33906e-21
NDUFB10	-0.70341	4.46305e-21
VIPR2	1.37793	4.60493e-21
TTLL7	1.35257	4.61868e-21
ERVFRD-1	2.25725	4.68735e-21
BEX4	1.16155	4.75432e-21
PTGFR	1.31023	4.78869e-21
FGF2	1.31984	4.91045e-21
KCND2	1.76261	5.19028e-21
SPRR2F	4.2096	5.43323e-21
COL22A1	1.34314	5.64288e-21
SLC25A3	-0.484631	5.66909e-21
SAMD11	1.05613	5.89055e-21
ASF1B	-0.659151	5.93305e-21
ZSCAN23	1.87457	6.03173e-21
C10orf10	1.07789	6.1017e-21
SELL	1.31111	6.41561e-21
FAM26E	1.08205	6.63235e-21
SLC24A3	1.09196	6.69154e-21
JTB	-0.515529	6.87987e-21
CUX2	1.87386	7.33331e-21
KIAA1614	0.848344	7.3397e-21
PMPCA	-0.551408	7.34716e-21
PAPPA2	1.85966	7.37628e-21
ATP2B3	2.83499	7.39377e-21
ATP5G3	-0.574179	7.40942e-21
ATP10A	1.02485	7.56994e-21
TMEM47	1.08143	8.35408e-21
ADCY5	1.38149	8.38978e-21
TLR6	1.13668	8.4719e-21
OXSM	-0.554287	8.48331e-21
KIF1A	2.25938	8.76434e-21
FAM19A4	2.58669	9.31357e-21
HOOK3	0.738062	9.60941e-21
REEP2	1.16095	9.81231e-21
PROK1	3.0354	1.00539e-20
COL16A1	1.01498	1.04494e-20
SCN1B	0.95279	1.06347e-20
COL25A1	1.86155	1.09737e-20
NAV1	0.868279	1.09926e-20
KCNJ13	2.99647	1.14268e-20
NCAN	2.5301	1.15884e-20
ATP5D	-0.981785	1.15943e-20
TTN	1.37838	1.16328e-20
TM6SF1	1.10394	1.17666e-20
RCCD1	-0.645312	1.23391e-20
FLNC	1.39502	1.26242e-20
PRR7	-1.2548	1.29675e-20
ATP5G1	-0.723845	1.33022e-20
PDK4	1.1484	1.36823e-20
AVPR1A	1.39261	1.41518e-20
CD28	1.08452	1.42586e-20
UCHL1	1.45915	1.5228e-20
PSMA5	-0.515153	1.52973e-20
HDAC9	1.23197	1.55486e-20
PALM	1.21795	1.57023e-20
GRIA3	1.55083	1.7624e-20
C15orf61	-0.733781	1.77192e-20
RPS8	-0.669253	1.77752e-20
DCAF4L2	5.37991	1.83453e-20
PRRX1	1.31661	1.85195e-20
NPR3	1.75723	1.87178e-20
HIST4H4	1.19407	1.92347e-20
HRH2	1.44125	1.9799e-20
TUSC2	-0.514139	2.18281e-20
WRAP73	-0.519818	2.23475e-20
C15orf59	1.18141	2.23959e-20
USP51	1.02966	2.37103e-20
ECI1	-0.798193	2.38194e-20
FIGF	1.60903	2.48509e-20
MRPL27	-0.61345	2.49968e-20
ATP5EP2	-1.49602	2.50388e-20
RFTN2	0.815741	2.69421e-20
GRIK1	1.46215	2.87165e-20
ADAMTS12	1.11938	2.94636e-20
NOTCH4	0.701289	3.04006e-20
ST8SIA4	0.974391	3.31648e-20
NKAPL	1.3048	3.34155e-20
MPPED2	1.35139	3.47055e-20
FUT9	3.68515	3.48223e-20
ST6GALNAC5	1.33893	3.56014e-20
RPS13	-0.596996	4.13416e-20
RERGL	2.11379	4.18005e-20
USP34	0.646698	4.19102e-20
GALR1	2.27482	4.3714e-20
C19orf60	-0.972523	4.40944e-20
PPIA	-0.560178	4.46471e-20
POC1A	-0.679303	4.55751e-20
LAYN	0.978432	4.57105e-20
PALM2	1.54029	4.57337e-20
TRO	0.95387	4.628e-20
PDCD6	-0.595907	4.63456e-20
INPP4A	0.411337	4.95601e-20
SDHB	-0.551573	4.96873e-20
FLT1	0.750431	5.13818e-20
UBE2T	-0.706861	5.14019e-20
SFRP4	1.73743	5.20628e-20
TMEM108	1.06433	5.27456e-20
TSHR	1.62341	5.50882e-20
ARHGAP28	1.10884	5.69335e-20
CNRIP1	0.842345	5.88649e-20
IL16	0.990784	5.90681e-20
MXD3	-0.736401	5.9567e-20
PGP	-0.7818	6.00044e-20
MRPL21	-0.559946	6.00959e-20
CXorf67	4.53391	6.0669e-20
HECW2	0.944243	6.07662e-20
IGLON5	1.51401	6.47962e-20
TREML4	2.47046	6.52481e-20
CHRD	0.971289	6.77853e-20
ADAMTS8	1.32369	7.22927e-20
LRRN2	1.36645	7.33874e-20
NDUFS8	-0.799022	7.44054e-20
CCR8	1.25739	7.6193e-20
CD200R1L	2.71213	7.64489e-20
HADH	-0.622336	7.86431e-20
CLTA	-0.522787	7.94687e-20
CTNND2	1.69897	8.19521e-20
PCDH10	1.90192	8.22342e-20
PTPRC	1.18971	8.38167e-20
ELP6	-0.507657	8.39589e-20
HRH3	3.40353	8.51538e-20
PDE1B	1.19549	8.64507e-20
CPAMD8	0.957602	9.50596e-20
MRPS16	-0.412833	9.74052e-20
UQCR10	-0.71131	1.01859e-19
AKR1A1	-0.60039	1.0441e-19
FPGS	-0.632301	1.05438e-19
RANBP3L	1.6657	1.11306e-19
RGS5	0.977555	1.15171e-19
CENPM	-0.994348	1.16074e-19
ERI3	-0.526053	1.16439e-19
GAB3	0.845935	1.16911e-19
FLT4	0.883017	1.17053e-19
ZNF469	1.18643	1.17239e-19
PAPLN	0.973313	1.20639e-19
KIF5C	1.2268	1.21439e-19
OR51E2	1.36711	1.22074e-19
ITGAV	0.747741	1.23077e-19
RPRM	1.86382	1.43494e-19
EXOSC2	-0.45525	1.44967e-19
HIST1H3I	2.57606	1.45264e-19
KDF1	-0.585143	1.46632e-19
LRRC70	1.06723	1.47256e-19
PIK3R5	1.04937	1.491e-19
MALSU1	-0.555412	1.50253e-19
SYNPO	0.711717	1.50533e-19
HIST1H3J	2.12154	1.51066e-19
GIMAP6	0.909093	1.54071e-19
EPGN	1.89682	1.55288e-19
PPP1R16B	1.03275	1.59361e-19
RAN	-0.521804	1.66296e-19
UQCC2	-0.66423	1.69394e-19
H2AFX	-0.765213	1.71476e-19
SLC16A7	1.58624	1.72269e-19
ELAVL1	-0.305578	1.73077e-19
MRPL54	-0.710324	1.80289e-19
FAM20A	1.14606	1.85514e-19
COMP	1.97696	1.87901e-19
APLNR	0.960809	1.96889e-19
CLIC4	0.847539	2.02507e-19
LPPR4	1.08287	2.05554e-19
TPM2	1.01989	2.07096e-19
DGKB	2.37787	2.1072e-19
C9orf142	-0.668611	2.18922e-19
STRA13	-0.856783	2.20784e-19
CCNB1	-0.714542	2.24672e-19
GLI2	1.09061	2.31137e-19
PRELID1	-0.653173	2.33548e-19
ADRA1A	1.71651	2.33873e-19
RPL18	-0.72133	2.4832e-19
OLR1	1.5509	2.48444e-19
DTYMK	-0.615713	2.51189e-19
CUBN	0.907937	2.52437e-19
SFXN4	-0.565638	2.62195e-19
LGI1	2.37334	2.6887e-19
EFHD1	1.01788	2.69825e-19
TSPO	-0.745817	2.69937e-19
LSM7	-0.886681	2.77003e-19
TRUB2	-0.50341	2.77496e-19
OSGEP	-0.516651	2.79585e-19
KATNAL1	0.822099	2.89844e-19
CTD-2370N5.3	1.92858	2.98297e-19
KLHL6	1.13633	3.05358e-19
CYP46A1	1.23214	3.06073e-19
CYC1	-0.93376	3.17082e-19
APBB1	0.942956	3.35801e-19
LUM	1.16785	3.39497e-19
CACNG7	2.57224	3.40435e-19
MDFIC	0.995488	3.66048e-19
ANKRD12	0.759158	3.76409e-19
HERC1	0.559923	3.76493e-19
MRPL20	-0.476874	3.77646e-19
PDE5A	0.895008	3.84374e-19
FLNA	1.05023	3.9763e-19
PSMB2	-0.459068	3.98244e-19
CDON	0.881215	4.18164e-19
MED12L	1.43208	4.22882e-19
YPEL4	1.14365	4.25725e-19
UNCX	3.87877	4.42611e-19
ANKRD55	1.36214	4.44741e-19
LOX	1.12041	4.55825e-19
FEZ1	0.869066	4.61375e-19
SNRNP25	-0.744518	4.69418e-19
PTGES2	-0.741966	4.99344e-19
SCN3B	1.44505	5.04601e-19
PDSS1	-0.560594	5.32448e-19
ITGBL1	1.61736	5.55116e-19
GADD45GIP1	-0.689792	5.69413e-19
RP11-690P14.4	1.72423	5.93081e-19
GDF6	1.73693	6.02846e-19
SASH1	0.614375	6.09145e-19
GRID1	1.01995	6.57818e-19
FAM127C	0.919973	7.03525e-19
PCDHA10	1.6184	7.17887e-19
TMEM147	-0.671994	7.66525e-19
C1QTNF3	1.03616	7.84117e-19
FBN2	1.01491	7.8984e-19
C12orf40	2.76346	8.13178e-19
LURAP1	0.965181	8.31366e-19
TMEM160	-1.47973	8.36515e-19
ANKRD35	0.984228	8.54053e-19
PSG7	4.59108	9.14723e-19
MRPL14	-0.622147	9.20923e-19
STK32B	1.06415	9.23086e-19
QPCTL	-0.570644	1.00879e-18
C17orf89	-0.739466	1.01219e-18
AKAP13	0.599492	1.01966e-18
CXorf21	1.05442	1.05203e-18
CDCA3	-0.6565	1.05987e-18
GPR183	1.0704	1.06172e-18
NOA1	-0.462193	1.0812e-18
DCN	1.14349	1.09063e-18
SIRPB2	1.15324	1.13266e-18
SOHLH2	2.95207	1.1371e-18
BGN	1.13421	1.15078e-18
RPSA	-0.654053	1.19316e-18
PAGE1	4.1072	1.21387e-18
FCRL1	2.07177	1.26194e-18
PRDX2	-0.647665	1.28547e-18
RPS14	-0.831433	1.30573e-18
KLHL38	1.44272	1.32049e-18
GLRB	1.20428	1.32229e-18
CD163	1.35267	1.32628e-18
ATPIF1	-0.63344	1.329e-18
KRTCAP3	-0.768154	1.41903e-18
RGL1	0.748306	1.43766e-18
CMTM3	0.802217	1.51623e-18
SNAP91	2.05397	1.52213e-18
CHSY3	0.967386	1.54585e-18
ANGPT1	1.0696	1.55652e-18
CARD8	0.536444	1.57529e-18
RPS2	-0.777762	1.67131e-18
ZNF511	-0.679403	1.67942e-18
ALPK2	1.16523	1.69667e-18
ASPN	1.49133	1.70774e-18
CNR1	1.8312	1.72457e-18
TCF21	0.939951	1.7335e-18
UBE2J2	-0.451861	1.74535e-18
C9orf16	-0.741088	1.75132e-18
PCBD1	-0.520962	1.83297e-18
STXBP5L	2.03553	1.90417e-18
COA3	-0.66262	1.95343e-18
EXTL1	1.44035	1.95343e-18
ARHGAP30	0.951689	2.00179e-18
STARD9	0.931612	2.01323e-18
POLR1C	-0.538389	2.01403e-18
ZNF829	1.17971	2.13206e-18
DDX39A	-0.639423	2.16117e-18
LPAR4	1.27382	2.16339e-18
FAM126A	1.03901	2.21184e-18
PPP1R3C	1.24319	2.2203e-18
EID3	0.831861	2.24432e-18
B4GALNT1	0.940106	2.32535e-18
SLA	1.00167	2.4855e-18
NDUFA8	-0.535581	2.56007e-18
P4HTM	-0.660357	2.56438e-18
PCDHB4	1.25295	2.6817e-18
RYR3	0.943384	2.70966e-18
REV3L	0.6421	2.73059e-18
CDC42EP3	0.703698	2.83915e-18
CHST15	0.973688	2.86126e-18
FCRL3	1.54088	3.03575e-18
2021-03-01	0.870451	3.03753e-18
ZDBF2	1.28932	3.08493e-18
ZCCHC18	0.965825	3.13213e-18
TACR2	1.55268	3.29821e-18
BID	-0.661613	3.33986e-18
DIP2C	0.765756	3.36239e-18
MEOX1	1.17861	3.38612e-18
ENDOG	-1.05128	3.45531e-18
ABL2	0.53834	3.50013e-18
PIRT	1.84515	3.50013e-18
RP11-11N7.5	1.2902	3.5173e-18
MRPS15	-0.56839	3.56827e-18
ZNF812	1.64333	3.56827e-18
ZMYND19	-0.553274	3.59218e-18
TPST1	0.898448	3.61536e-18
RFC2	-0.511847	3.61595e-18
LYST	0.746362	3.62387e-18
SLC2A3	1.11955	3.87905e-18
TMEM125	-0.776777	3.89906e-18
P2RX7	1.0572	3.9144e-18
PSMB1	-0.529327	3.92786e-18
ARMCX2	0.992591	3.94894e-18
GLI1	0.93678	3.98374e-18
PRKCH	0.657335	4.0151e-18
MAGEE2	1.88599	4.0256e-18
LIX1L	0.762199	4.0658e-18
KLF17	1.68232	4.1179e-18
NTNG1	2.0062	4.20409e-18
NOP16	-0.554568	4.43497e-18
USHBP1	0.747909	4.57259e-18
MRPS2	-0.712146	4.60704e-18
TCEAL6	2.27527	4.78511e-18
NAV3	1.4113	4.79127e-18
COL4A4	1.47807	4.89071e-18
ACSM5	1.54216	4.9502e-18
NENF	-0.711858	5.0873e-18
SPARC	0.951615	5.15187e-18
SNX18	0.54914	5.25433e-18
EHD3	0.82652	5.27259e-18
SLC25A5	-0.727991	5.44669e-18
MICU3	1.25636	5.49566e-18
SYNGR4	2.05199	5.55555e-18
COL1A1	1.2225	5.7154e-18
SCGB3A2	2.73384	5.7303e-18
ZNF524	-0.706229	5.89371e-18
COL11A1	1.49761	5.91042e-18
LGALS12	1.80939	5.97415e-18
PAEP	-4.66881	6.08853e-18
TIMM50	-0.525456	6.36998e-18
RPL13	-0.761543	6.81817e-18
CCDC36	1.11315	6.83871e-18
HIST1H4F	3.93191	7.0442e-18
GPX3	1.15327	7.31451e-18
TUBB4B	-0.680662	7.35782e-18
GLYATL2	1.94978	7.38302e-18
GUCY1A2	1.31868	7.43888e-18
CNIH4	-0.654477	7.62736e-18
CSPG4	0.932439	7.76293e-18
CD300LG	2.56067	7.87103e-18
C9orf89	-0.66341	7.97552e-18
DIO2	1.02739	8.21258e-18
HDHD3	-0.631814	8.23471e-18
PLEKHJ1	-0.591908	8.37382e-18
PAGE4	2.87002	8.41352e-18
SMDT1	-0.569493	8.45663e-18
CHST3	0.961966	8.66989e-18
SRA1	-0.520238	8.81515e-18
CLPP	-0.671771	9.00739e-18
PHF5A	-0.573568	9.07469e-18
CHCHD10	-0.973101	9.43389e-18
STX10	-0.567097	9.58077e-18
MRPL16	-0.553984	9.59756e-18
PIK3CG	1.13484	9.94525e-18
COX6A1	-0.618779	1.00466e-17
SLITRK1	3.02122	1.02081e-17
DYNLT1	-0.559226	1.04094e-17
APOA1BP	-0.633934	1.05801e-17
TET1	1.08878	1.06173e-17
MRPS12	-0.699443	1.07742e-17
MMP14	0.823272	1.11363e-17
RPL18A	-0.756939	1.11984e-17
TRAPPC5	-1.58969	1.13039e-17
NUTF2	-0.563547	1.20829e-17
RIMKLB	1.08233	1.21419e-17
FOXRED1	-0.580279	1.21752e-17
PABPC3	-1.40161	1.23109e-17
CHI3L2	1.37504	1.24293e-17
FGD5	0.885677	1.2619e-17
CAP2	0.886839	1.27667e-17
GFAP	1.59514	1.30693e-17
PSMB4	-0.494004	1.30744e-17
PSMB3	-0.682879	1.3101e-17
ZNF671	0.858906	1.32295e-17
NUDT8	-1.11565	1.35151e-17
PPIH	-0.595016	1.36408e-17
NLRP3	0.978134	1.37736e-17
NTM	1.24486	1.38078e-17
ADAMTSL4	0.982575	1.39263e-17
CIDEA	3.55323	1.40649e-17
IFRD2	-0.6208	1.4133e-17
ATM	0.668316	1.41341e-17
MXRA7	0.810606	1.41649e-17
MS4A4E	1.35226	1.47012e-17
TECTA	0.937732	1.49284e-17
RANBP1	-0.530126	1.5186e-17
SLC27A6	1.91817	1.53163e-17
SDCCAG3	-0.47525	1.53924e-17
UBAC1	-0.486539	1.55405e-17
NDUFA6	-0.641917	1.65207e-17
FZD1	0.615046	1.68511e-17
CACNB4	1.46477	1.70862e-17
RPS3	-0.728385	1.76365e-17
TNS3	0.541227	1.89497e-17
WDR34	-0.740237	1.89894e-17
MDH2	-0.524268	1.9117e-17
MRPL48	-0.553536	1.95008e-17
RPL12	-0.618115	1.97692e-17
FXYD1	1.34008	1.99512e-17
TAS2R19	1.63338	2.00343e-17
BDH1	-0.649499	2.01496e-17
FLAD1	-0.525184	2.02855e-17
P2RY14	1.09924	2.103e-17
SAMD1	-0.531215	2.23985e-17
RPN1	-0.402455	2.27824e-17
THY1	0.86136	2.28568e-17
AR	1.37012	2.30127e-17
ANAPC5	-0.384048	2.30838e-17
TOR2A	-0.61261	2.39281e-17
CLEC17A	1.71213	2.41018e-17
CILP2	1.54185	2.42582e-17
ACSM6	2.44524	2.43978e-17
FAM96B	-0.799632	2.44404e-17
STOML2	-0.555954	2.50337e-17
SLFN12L	1.15256	2.53019e-17
C3orf36	1.0596	2.53218e-17
HIST1H4K	1.61993	2.53767e-17
ECE2	-0.760049	2.60134e-17
UNC80	1.8782	2.79009e-17
ASB5	2.67	2.79305e-17
SRPX	1.07833	3.00795e-17
MACROD1	-0.940036	3.04713e-17
JAGN1	-0.466381	3.05008e-17
BLOC1S5-TXNDC5	1.34618	3.18059e-17
MRPL43	-0.586536	3.19021e-17
PPA2	-0.555765	3.22791e-17
LDOC1	0.975018	3.26641e-17
CYLD	0.518088	3.3388e-17
LATS2	0.657242	3.51195e-17
RPLP2	-0.695599	3.51851e-17
PLEKHG2	0.642132	3.68775e-17
SELE	1.35658	3.99662e-17
EBP	-0.721867	4.07283e-17
SUSD6	0.482451	4.24122e-17
NAP1L6	1.74714	4.33233e-17
SPOCK2	0.983883	4.41445e-17
SNAP25	1.85179	4.43406e-17
MRPL24	-0.581083	4.46552e-17
MYO3A	2.02327	4.53332e-17
F2RL3	0.839619	4.62377e-17
AMZ1	1.24866	4.67751e-17
TMOD1	1.29225	4.7352e-17
EDIL3	0.912564	4.77812e-17
HMBS	-0.612847	4.83775e-17
PM20D1	1.56858	4.9122e-17
RIC1	0.466312	5.00564e-17
RPS6KB2	-0.547153	5.08894e-17
UQCR11	-0.570158	5.11231e-17
DNPH1	-0.909402	5.45636e-17
GPR176	0.887437	5.4876e-17
DPYSL5	2.33063	5.61622e-17
SMIM22	-0.792805	5.69605e-17
PSRC1	-0.610045	5.69718e-17
DPCD	-0.638808	5.7006e-17
CECR5	-0.579557	5.74134e-17
NCKAP5L	0.599434	5.80266e-17
GDPGP1	-0.613136	5.90033e-17
KCNJ15	1.47492	6.1474e-17
PLCL1	0.889831	6.16212e-17
EXOSC7	-0.524084	6.27982e-17
DOCK8	0.976677	6.28073e-17
MYO9A	0.559991	6.31428e-17
SH3PXD2A	0.618759	6.44732e-17
BAALC	1.21591	6.45444e-17
PROKR1	1.72644	6.58871e-17
PSG1	4.6422	6.63429e-17
ATP5J2	-0.671452	6.8083e-17
FAM124A	1.07264	6.87671e-17
GUK1	-0.789689	7.046e-17
RPS9	-0.629175	7.18753e-17
WWC2	0.952647	7.2287e-17
NDUFB11	-0.570284	7.23241e-17
DDX28	-0.54555	7.31657e-17
TMPRSS11D	2.76477	7.34135e-17
EIF3K	-0.556387	8.26058e-17
CYSLTR1	1.00214	8.32144e-17
LGI2	1.14091	8.46836e-17
ECSCR	0.80183	8.71979e-17
NPAS4	1.55547	8.90109e-17
MRPL36	-0.55348	8.91237e-17
C19orf52	-0.420494	8.97442e-17
POP7	-0.53453	9.06601e-17
UQCRC2	-0.480279	9.09525e-17
MPST	-0.704704	9.14138e-17
HNRNPAB	-0.469815	9.41976e-17
CIAPIN1	-0.429476	9.67571e-17
ADAM33	1.24978	9.68233e-17
UBE2D2	-0.367163	9.95912e-17
CISD3	-0.651691	9.97245e-17
UBA52	-0.626802	1.01037e-16
CAMSAP2	0.624871	1.01452e-16
HAS1	1.78801	1.03564e-16
COQ5	-0.468636	1.04557e-16
HN1	-0.571334	1.0502e-16
TRAPPC2L	-0.673181	1.05703e-16
RGS2	1.01394	1.07009e-16
RNASEH2A	-0.659724	1.09401e-16
KRTAP4-6	4.10814	1.17513e-16
CKS2	-0.722179	1.18657e-16
COL26A1	1.63745	1.1901e-16
FGF12	1.07089	1.20025e-16
RPLP0	-0.677029	1.20697e-16
RBM20	1.33645	1.23325e-16
SLITRK2	1.79423	1.25104e-16
CYP19A1	1.18233	1.25307e-16
ZNF98	1.8781	1.26557e-16
NOTCH2	0.58442	1.27088e-16
TPRN	-0.762004	1.27442e-16
SLC25A39	-0.599373	1.32097e-16
TLN1	0.505937	1.35585e-16
LSP1	0.872959	1.40549e-16
CCT2	-0.474548	1.41269e-16
MRPL55	-0.868739	1.42298e-16
LAMTOR2	-0.522789	1.44554e-16
PLEKHM3	0.642552	1.47047e-16
LTF	1.31846	1.48612e-16
PDGFRL	1.31686	1.51014e-16
SNAI2	0.879385	1.5451e-16
PEAK1	0.525377	1.62731e-16
TPH1	1.56871	1.64529e-16
C16orf91	-0.617716	1.68274e-16
SNRK	0.420204	1.69942e-16
VPS29	-0.489517	1.70626e-16
VIP	1.70961	1.71801e-16
LRRN4CL	0.918447	1.73255e-16
IKZF1	1.04552	1.75859e-16
SMIM18	1.98682	1.78579e-16
RAB39B	1.19961	1.88915e-16
KIDINS220	0.476922	1.89016e-16
ASB2	1.14073	1.90134e-16
TUFM	-0.56879	1.91961e-16
NDUFB4	-0.477444	1.95217e-16
CCDC51	-0.505495	1.96219e-16
CD320	-0.78334	2.00172e-16
TIMM23	-0.429516	2.00512e-16
BIRC5	-0.660025	2.01353e-16
MAFB	1.00535	2.05923e-16
CREBRF	0.672268	2.12506e-16
PSG9	3.83135	2.17288e-16
ATP5B	-0.535808	2.18896e-16
PRDM1	0.75525	2.24123e-16
AP1S1	-0.651808	2.26631e-16
PUS1	-0.636158	2.36129e-16
TRIM9	1.35135	2.37916e-16
ARRDC1	-0.61894	2.44694e-16
FOXF1	0.780265	2.47475e-16
NDN	0.878404	2.52998e-16
TLR10	1.34236	2.58255e-16
CDH6	0.7571	2.60561e-16
NAALAD2	0.971907	2.73031e-16
SLCO4C1	1.63004	2.76927e-16
NTN1	1.05036	2.79141e-16
PTGDS	1.21027	2.80945e-16
ATPAF1	-0.451875	2.84914e-16
SRM	-0.72861	2.88386e-16
DACT1	1.01836	2.88425e-16
FCN1	1.42151	2.88914e-16
TALDO1	-0.505336	2.98375e-16
NKX3-2	1.11402	3.06492e-16
SOX7	0.976299	3.07113e-16
ITGB1	0.528601	3.10641e-16
C1orf195	1.92098	3.11379e-16
SEMA3D	1.7891	3.14956e-16
ANGPT4	1.24752	3.15109e-16
OLFML2A	0.721208	3.15382e-16
TMEM169	1.03814	3.20205e-16
KLF8	0.952052	3.21021e-16
C19orf70	-0.641539	3.23781e-16
NUDT11	1.14895	3.26285e-16
QDPR	-0.495652	3.33024e-16
PER1	0.789443	3.34795e-16
ZNF80	1.66483	3.35679e-16
DFFB	-0.455258	3.52702e-16
PIP4K2A	0.477737	3.54633e-16
NDUFC1	-0.491014	3.56974e-16
EPHA5	1.6461	3.59531e-16
GPR1	1.31363	3.62386e-16
SRSF7	-0.385243	3.70467e-16
CEP85L	0.983604	3.70867e-16
PPIF	-0.574507	3.8028e-16
TDRD10	0.983555	3.81882e-16
NUBP2	-0.603415	3.88181e-16
UBBP4	-1.04208	4.16607e-16
NLGN2	0.869416	4.16702e-16
NCKAP1L	0.942864	4.1794e-16
RABEPK	-0.547929	4.18542e-16
BUB3	-0.39902	4.33958e-16
IDH2	-0.715582	4.43965e-16
UQCRH	-0.587798	4.65323e-16
ANAPC7	-0.37287	4.92088e-16
TSTD1	-0.691686	5.23273e-16
C1orf162	0.88871	5.25974e-16
NT5C	-0.583195	5.27321e-16
HP	2.19382	5.48038e-16
XKR4	1.84215	5.95151e-16
NDST1	0.482051	6.01907e-16
MRPL2	-0.702576	6.08049e-16
CLDN20	1.31753	6.16326e-16
PPP4C	-0.669254	6.22308e-16
TMEM106C	-0.65341	6.38072e-16
CRTAC1	1.75657	6.44432e-16
SHPRH	0.671258	6.88811e-16
THEMIS2	0.783026	6.94242e-16
KCNA3	1.35189	7.00538e-16
FSIP2	1.40349	7.23618e-16
CDC20	-0.720839	7.41764e-16
NREP	0.693658	7.42241e-16
CDCA8	-0.545786	7.67633e-16
POSTN	1.31515	7.70274e-16
CCM2L	0.748573	8.23091e-16
FAM98C	-0.53536	8.29204e-16
TENM3	1.48371	8.49968e-16
RNF34	-0.334254	8.69895e-16
MATN3	1.31141	8.74591e-16
UQCC3	-0.687841	8.80676e-16
HNRNPF	-0.368388	8.82855e-16
TACO1	-0.501117	8.84801e-16
APEH	-0.548771	9.0256e-16
SLC24A4	1.01183	9.05499e-16
CD180	1.03487	9.07105e-16
TEX264	-0.518767	9.20843e-16
CHRNB2	2.00307	9.32555e-16
SPAG6	2.06972	9.46531e-16
CSRNP3	1.34681	9.47292e-16
DPM3	-0.960886	9.95004e-16
RP11-219A15.1	2.16	9.96583e-16
MRPL34	-0.582335	1.00351e-15
CCDC102B	0.884194	1.0214e-15
MRC1	1.28465	1.04044e-15
CENPV	-0.603683	1.07129e-15
DCXR	-0.735043	1.08188e-15
PTGS1	0.859832	1.11877e-15
FDCSP	2.12597	1.13762e-15
SHISA7	2.0441	1.13787e-15
MCF2L2	0.73751	1.13819e-15
YDJC	-0.728395	1.15779e-15
PARK7	-0.465199	1.18289e-15
RPS5	-0.87809	1.18348e-15
SF3B5	-0.640126	1.20524e-15
CAV1	0.897641	1.23105e-15
TPI1	-0.56732	1.23359e-15
PCDHGA9	1.03095	1.23581e-15
PSMD13	-0.441423	1.23941e-15
CRYBG3	0.802986	1.24221e-15
EIF2B1	-0.305287	1.24598e-15
LBH	0.73275	1.25113e-15
HVCN1	0.743696	1.25888e-15
DBX2	2.16715	1.25954e-15
TP53INP1	0.705862	1.33379e-15
LRRC15	1.24112	1.34796e-15
RAB30	0.696846	1.37557e-15
FAIM3	0.987979	1.38183e-15
MRTO4	-0.518882	1.41542e-15
PLCG2	0.894533	1.42714e-15
KCNH7	1.47416	1.42735e-15
ALPL	0.974994	1.4449e-15
ANKRD36C	1.17635	1.44674e-15
IL1RL1	1.2276	1.46078e-15
TAOK1	0.555862	1.49044e-15
FAM101B	0.677835	1.54032e-15
MRPL23	-0.682285	1.5592e-15
FAM173A	-1.03018	1.59995e-15
ITK	1.04936	1.60156e-15
MYDGF	-0.629246	1.61245e-15
HPSE2	1.26849	1.66585e-15
IRAK3	1.10566	1.71931e-15
SIVA1	-0.835693	1.77605e-15
DHH	1.07076	1.84326e-15
NDUFA10	-0.395569	1.85672e-15
ABT1	-0.440117	1.8609e-15
CFAP20	-0.391849	1.90029e-15
GPR162	0.782207	1.9114e-15
EVI2B	1.02793	1.91152e-15
CPT1C	0.911848	1.94484e-15
MYOT	1.68226	1.95424e-15
CPEB4	0.669647	1.97663e-15
MLST8	-0.661516	1.98242e-15
SLBP	-0.471768	1.99276e-15
LRAT	1.75982	2.06985e-15
GALE	-0.637132	2.10142e-15
ALKBH7	-0.780359	2.13927e-15
ARHGAP24	0.84166	2.15373e-15
CUTA	-0.50183	2.17385e-15
EIF4EBP1	-0.788317	2.17395e-15
RAB25	-0.598944	2.17407e-15
CIB1	-0.621399	2.19924e-15
TMEM196	2.32779	2.2015e-15
PGLS	-0.577594	2.25362e-15
TMEM219	-0.479308	2.4232e-15
PLEKHG1	0.541217	2.46284e-15
ATP2B2	1.69034	2.48757e-15
POU3F4	2.52482	2.57025e-15
MS4A2	1.33103	2.58876e-15
TXNDC2	1.77498	2.68581e-15
GFRA3	1.5414	2.69129e-15
GLRA3	1.81651	2.69146e-15
WNT9B	1.50621	2.69382e-15
TIMM13	-0.729381	2.75894e-15
PVRIG	1.30328	2.77641e-15
CNTNAP3B	1.62299	2.91184e-15
KIF3C	0.680974	2.92251e-15
PGM5	1.37647	2.94207e-15
CCL21	1.45357	2.97623e-15
ANKRD54	-0.513603	2.99247e-15
IQSEC3	1.14422	3.09645e-15
TICAM2	1.05404	3.1434e-15
RIMS1	1.83393	3.15783e-15
ITGA1	0.626399	3.18123e-15
C1orf159	-0.586831	3.28561e-15
CADM1	1.10385	3.36094e-15
SDHAF1	-0.558608	3.38152e-15
SDC2	0.805823	3.39807e-15
C1orf95	1.81018	3.40505e-15
MRPL52	-0.54231	3.41428e-15
PIANP	1.09402	3.43125e-15
DESI1	-0.414281	3.43202e-15
GIPC3	0.710747	3.61493e-15
DALRD3	-0.581377	3.63842e-15
SUCLG1	-0.51537	3.64836e-15
ZNF593	-0.721881	3.73904e-15
CR2	1.89027	3.77831e-15
DMP1	2.19005	3.82854e-15
WDFY3	0.519412	3.86053e-15
SMPD2	-0.54831	3.94121e-15
BTK	0.972349	3.94334e-15
TRAIP	-0.576458	4.04107e-15
UROS	-0.425912	4.19415e-15
FRMD4A	0.680055	4.20123e-15
LCP1	0.96596	4.22846e-15
PCDHB12	1.12438	4.33031e-15
HIST1H2AE	1.38176	4.34211e-15
CD79B	1.15174	4.52038e-15
MBD5	0.432088	4.61034e-15
MYO16	1.2483	4.63367e-15
ST3GAL6	0.909226	4.6407e-15
PRAM1	0.965114	4.77343e-15
TGFB2	1.09874	4.94579e-15
TAGAP	0.995948	5.0028e-15
SPRR2B	4.03748	5.00641e-15
RPL36	-0.697035	5.03055e-15
FCRLA	1.53892	5.10584e-15
URM1	-0.457188	5.1545e-15
ZBTB37	0.737044	5.24455e-15
TMEM238	-1.37306	5.29659e-15
HIST2H3D	1.67163	5.44102e-15
GRPEL1	-0.440947	5.46973e-15
UBE2E2	0.913807	5.5575e-15
NAIP	0.990781	5.61219e-15
TBCEL	0.683008	5.71104e-15
NDUFS5	-0.63352	5.73925e-15
TMEFF2	1.83779	5.77375e-15
HECTD2	0.833177	5.81464e-15
GPR161	0.832241	5.83147e-15
MORN5	2.35791	5.83394e-15
MTCH2	-0.401679	6.10135e-15
PPP1CA	-0.480494	6.14593e-15
IDS	0.570053	6.20556e-15
VDAC2	-0.441192	6.41969e-15
JPH3	1.5174	6.43494e-15
TMEM134	-0.543844	6.48604e-15
SHMT2	-0.650938	6.60955e-15
ANKRD50	0.58148	6.70239e-15
AP1M2	-0.503756	6.70609e-15
HIST1H3D	1.42751	6.94591e-15
THPO	1.20832	7.00359e-15
PUSL1	-0.680716	7.03569e-15
CNTNAP4	2.7419	7.26469e-15
ZDHHC12	-0.655987	7.38233e-15
GLCCI1	0.647516	7.40675e-15
SAC3D1	-0.838216	7.42119e-15
PPP2R2D	-0.35408	7.49193e-15
FAM198B	0.92905	7.61712e-15
NR2F6	-0.696171	7.75799e-15
MEIS2	1.13906	8.24062e-15
ENOPH1	-0.418116	8.33819e-15
TMEM140	0.526968	8.62343e-15
NOTCH3	0.80524	8.63041e-15
SH2D3C	0.73403	8.8729e-15
MFGE8	0.784358	8.92762e-15
NME1	-0.64755	9.03028e-15
PTTG1	-0.643845	9.08432e-15
SH3GLB2	-0.600051	9.43534e-15
TLR2	0.957674	9.45191e-15
RRP9	-0.578442	1.02137e-14
PREX1	0.675869	1.03781e-14
KLF7	0.772549	1.04196e-14
ABCD2	1.17057	1.05491e-14
CCNB2	-0.599407	1.06385e-14
RPL35A	-0.53923	1.0879e-14
RPS16	-0.748255	1.09435e-14
ZMIZ1	0.447822	1.12014e-14
TARBP2	-0.576264	1.14917e-14
GPATCH2L	0.467975	1.15057e-14
MROH9	2.8727	1.15172e-14
SPSB1	0.518638	1.15544e-14
TNFRSF8	0.959099	1.16018e-14
CLCA2	2.37021	1.1721e-14
BCL6	0.677066	1.17906e-14
MTX1	-0.434452	1.23014e-14
AKR7A3	-0.916598	1.26563e-14
FAM162A	-0.548062	1.26713e-14
GPM6B	0.933387	1.27694e-14
PCDHGC3	1.0486	1.35354e-14
CDT1	-0.792221	1.37652e-14
SYCP3	1.14931	1.41966e-14
RQCD1	-0.310336	1.42453e-14
CD1E	1.21682	1.43578e-14
SCEL	1.9107	1.46933e-14
2021-09-04	0.678171	1.47589e-14
ENG	0.647831	1.47813e-14
CSF1	0.710657	1.484e-14
POU3F3	2.07748	1.50713e-14
PLEKHH2	1.05713	1.5251e-14
PLEKHO2	0.665309	1.53066e-14
SLC12A6	0.501827	1.59867e-14
PHACTR1	0.82471	1.622e-14
CASC10	0.85773	1.63089e-14
AXL	0.812524	1.66794e-14
LAX1	1.20746	1.71842e-14
TXLNB	1.09881	1.72442e-14
PXMP2	-0.564535	1.72752e-14
DCAF12L2	1.9819	1.73605e-14
ISOC2	-0.568163	1.75024e-14
HMOX2	-0.485601	1.77146e-14
DPYS	1.85015	1.77413e-14
NHP2L1	-0.437881	1.77991e-14
NDUFA3	-0.67625	1.7828e-14
TCEB2	-0.735957	1.81364e-14
SCG2	1.28421	1.90139e-14
RDX	0.92554	1.92602e-14
SOGA3	1.29638	1.9298e-14
APBB1IP	0.925295	1.93844e-14
SNRPA1	-0.455129	1.93846e-14
TMEM203	-0.365037	1.93861e-14
ZNF418	1.10715	1.93861e-14
RPUSD3	-0.432768	1.94295e-14
RPL28	-0.749559	1.95065e-14
GCNT7	1.26713	2.01651e-14
CTIF	0.552274	2.07372e-14
TRAP1	-0.529304	2.09853e-14
CRB3	-0.579206	2.0987e-14
GSTK1	-0.535123	2.11227e-14
CTU1	-1.03487	2.11869e-14
ITGAL	0.975421	2.15311e-14
NMRAL1	-0.612019	2.15345e-14
C4orf45	1.91495	2.16749e-14
QARS	-0.469746	2.18006e-14
TAF10	-0.562616	2.19296e-14
UNC5B	0.747226	2.21676e-14
FARSB	-0.45201	2.22799e-14
HIST1H2BJ	1.27588	2.30953e-14
MGST3	-0.486553	2.32793e-14
PCDHGB7	1.18588	2.35569e-14
LRRC4	1.15267	2.35647e-14
NOP10	-0.531471	2.39371e-14
GBP6	1.73706	2.41394e-14
CHD6	0.595872	2.41424e-14
CYBA	-0.889518	2.42093e-14
PLK1	-0.635788	2.45002e-14
SYNE3	0.788254	2.45847e-14
TMEM52	-1.08774	2.49427e-14
TLR1	1.04332	2.5648e-14
COX18	-0.533743	2.61453e-14
PKMYT1	-0.787153	2.66258e-14
TMCC2	0.806183	2.68061e-14
AQPEP	1.32365	2.70372e-14
SOD1	-0.570411	2.73893e-14
TSPAN11	0.903961	2.74495e-14
NDUFB7	-0.768653	2.75819e-14
SCN3A	1.17403	2.77926e-14
HSPBP1	-0.64278	2.84309e-14
B9D1	-0.765892	2.92533e-14
PIKFYVE	0.523238	2.9383e-14
RBFOX3	1.55555	3.1097e-14
SLCO1C1	1.03071	3.13804e-14
RPUSD1	-0.644388	3.22709e-14
ARHGAP15	0.786255	3.23094e-14
EIF3I	-0.468579	3.2375e-14
GAPT	1.19044	3.2458e-14
INHA	1.97347	3.28075e-14
TMUB1	-0.585271	3.33462e-14
HIST1H3G	1.49643	3.41023e-14
COX8A	-0.590146	3.41815e-14
MRPS26	-0.717616	3.42646e-14
TIMM44	-0.503113	3.43494e-14
TRMU	-0.493209	3.44889e-14
NOVA2	0.776518	3.50995e-14
ADAMTS4	0.913436	3.5251e-14
FAAH	-0.717987	3.52955e-14
SNRPA	-0.435347	3.56665e-14
ILK	0.548985	3.59019e-14
DNAJA3	-0.442953	3.62453e-14
GRASP	0.656916	3.66359e-14
UMPS	-0.338521	3.80963e-14
CACNA1H	0.960693	3.92573e-14
RPP25L	-0.593011	4.06257e-14
ANKRD65	1.06405	4.1143e-14
TFEC	1.14092	4.18499e-14
C6orf136	-0.484209	4.1938e-14
H3F3C	-1.25036	4.20609e-14
CYSTM1	-0.6695	4.20614e-14
SRGAP2C	0.946287	4.34813e-14
BEND4	1.42937	4.4082e-14
TXNDC17	-0.582513	4.4697e-14
TBC1D9	0.775934	4.52853e-14
CDC45	-0.679689	4.58568e-14
CDC25C	-0.578447	4.60213e-14
TUBA3C	3.29113	4.60392e-14
GRIA4	1.4038	4.63779e-14
SDF2L1	-0.915326	4.63986e-14
SLC26A4	1.19248	4.80974e-14
SPCS1	-0.425438	4.84688e-14
ADPRH	0.585627	4.92331e-14
NCAPH2	-0.523635	4.96006e-14
AMBN	3.12261	5.14421e-14
RPL9	-0.736457	5.15247e-14
SPDYE1	1.12001	5.21253e-14
HSPB2	0.957515	5.33661e-14
SRGAP2B	0.792449	5.34319e-14
AK2	-0.414237	5.35086e-14
DPEP2	0.959201	5.41119e-14
NELFE	-0.44335	5.44987e-14
ATAD3A	-0.654603	5.45099e-14
ZNF25	0.546721	5.52133e-14
FMNL3	0.618285	5.55743e-14
MRPL17	-0.466997	5.56113e-14
FIBP	-0.43633	5.56977e-14
DPYD	1.06647	5.59656e-14
SUV39H1	-0.600358	5.59656e-14
RBP5	0.758904	5.66322e-14
FNDC4	0.801661	5.70538e-14
CTSG	1.70334	5.72064e-14
PITX1	-0.825338	5.87013e-14
C4orf48	-1.42736	5.91366e-14
DCTPP1	-0.587116	6.03988e-14
MAGOH	-0.471895	6.21745e-14
LOXHD1	1.26143	6.27274e-14
FRY	0.831057	6.32071e-14
BEND5	1.03861	6.36619e-14
GFRA2	1.13657	6.38834e-14
TKT	-0.518732	6.44469e-14
C1orf174	-0.370921	6.45217e-14
ITPRIP	0.592307	6.59709e-14
NDUFV3	-0.41819	6.76177e-14
ZFHX3	0.623586	7.01301e-14
NDUFV1	-0.607731	7.04075e-14
SIGMAR1	-0.579278	7.06705e-14
CPED1	0.977667	7.10359e-14
USP44	1.09146	7.2158e-14
SFTPB	2.42184	7.24967e-14
BMP6	1.03922	7.44107e-14
HAX1	-0.459224	7.63504e-14
CNPY4	0.477562	7.74524e-14
COPZ2	0.836904	7.98136e-14
TLR7	1.05626	8.36028e-14
APLP1	1.13221	8.39056e-14
SERINC1	0.419305	8.86396e-14
PURG	1.32044	8.8758e-14
BNIP1	-0.471224	8.96692e-14
NAA38	-0.799056	9.08258e-14
PBX3	0.599742	9.08335e-14
PPAP2C	-0.675006	9.63823e-14
COA4	-0.462546	9.73308e-14
TXNL4A	-0.472111	9.90251e-14
PPCS	-0.434086	9.91006e-14
PPAP2B	0.513137	1.04598e-13
ATP5F1	-0.481844	1.05872e-13
MRPS7	-0.481275	1.07366e-13
RUVBL2	-0.65663	1.07366e-13
TSPAN18	0.965193	1.09701e-13
FAM181B	1.76797	1.1084e-13
CD300LB	0.981462	1.12886e-13
PAFAH1B3	-0.675959	1.15559e-13
PHGR1	-1.45065	1.17254e-13
CHD9	0.602255	1.17566e-13
SCG3	1.95429	1.17566e-13
VCL	0.478329	1.19219e-13
ITGAM	1.14134	1.19634e-13
LHCGR	2.78515	1.23651e-13
[truncated: 17,713 more rows]

## Sheet: DEGs Group1 vs Group2-GSE39582
					Gene_symbol	logFC	adj.P.Val
					AURKA	-1.09499	1.16285e-73
					KIF4A	-1.02953	1.07294e-66
					TPX2	-1.20794	1.43702e-66
					AUNIP	-0.91453	3.43602e-65
					BRCA1	-0.926174	3.43602e-65
					ORC6	-0.813056	2.56287e-64
					RFC4	-0.852522	3.59507e-64
					KIF18B	-0.92698	3.59507e-64
					DNA2	-0.887077	3.59507e-64
					MTFR2	-1.11602	3.59507e-64
					SKA3	-0.873391	1.19307e-63
					CDCA5	-0.991381	1.68043e-63
					CENPA /// SLC35F6	-1.09109	5.86537e-63
					DEPDC1B	-1.07833	1.87813e-62
					NCAPG2	-0.944912	8.29403e-62
					SKP2	-0.859197	1.04602e-61
					NCAPH	-0.921341	6.6644e-61
					SPAG5	-0.83333	8.83081e-61
					DKC1 /// MIR664B /// SNORA56	-0.808286	1.03583e-60
					MELK	-0.937082	2.0354e-60
					SPC25	-1.18659	3.01804e-60
					CMSS1	-0.871664	5.09047e-60
					NEK2	-1.09071	7.29811e-60
					NCAPD3	-0.730891	9.02611e-60
					CDCA3	-0.871502	1.09533e-59
					RACGAP1	-0.83643	1.89145e-59
					TTK	-1.19105	3.59668e-59
					KIF15	-1.04699	3.71809e-59
					CDK1	-1.11977	8.44057e-59
					HJURP	-0.875328	1.02484e-58
					BUB1	-1.2016	1.41825e-58
					UBE2C	-1.14331	2.10392e-58
					CDC25C	-0.827404	3.1775e-58
					MCM10	-1.22591	5.40313e-58
					ZWINT	-0.795475	8.55252e-58
					BUB1B	-0.95561	2.05396e-57
					ZNF367	-0.969971	4.74074e-57
					CDC6	-1.31081	4.76178e-57
					PAICS	-0.77219	8.51786e-57
					MCM7	-0.765695	1.23591e-56
					ANAPC1 /// LOC730268	-0.585576	1.87856e-56
					STIL	-1.01352	6.07596e-56
					DTL	-0.975583	2.11546e-55
					ERCC6L	-0.813014	2.11546e-55
					DDIAS	-0.910023	4.01129e-55
					RFC3	-1.05381	4.18431e-55
					CDC25A	-1.13809	8.44335e-55
					PRIM1	-0.877536	1.51095e-54
					CHEK2	-0.699035	1.7378e-54
					EXO1	-0.895835	2.63232e-54
					PARPBP	-0.91716	4.40467e-54
					DBF4	-0.909034	6.90773e-54
					C1orf112	-0.874089	6.90773e-54
					EZH2	-0.941561	7.28427e-54
					UBE2T	-0.86784	7.73791e-54
					RNASEH2A	-0.90439	1.02151e-53
					RAD54B	-1.03975	1.36527e-53
					CKAP2L	-0.748669	2.00274e-53
					TIMELESS	-0.77821	2.88814e-53
					MND1	-1.15417	4.37415e-53
					TRAIP	-0.496182	6.71119e-53
					MCM6	-0.701217	1.18676e-52
					TRIP13	-1.04609	1.22085e-52
					CCNA2	-1.05128	1.70471e-52
					PUS7	-0.894393	2.28387e-52
					FBXO5	-0.878373	3.13519e-52
					CENPA	-0.612098	3.70477e-52
					WDR12	-0.646063	3.80055e-52
					GINS1	-1.19526	4.16979e-52
					MCM2	-0.866522	4.35407e-52
					CSE1L	-1.00668	4.6128e-52
					KIF23	-1.03464	1.7907e-51
					SUV39H2	-0.787498	3.70396e-51
					KPNA2	-0.675007	4.27836e-51
					KIF2C	-0.848888	4.92051e-51
					DNAJC9	-0.57646	8.76919e-51
					GGCT	-0.628982	2.48561e-50
					NCAPG	-0.908135	2.48561e-50
					CPSF3	-0.527584	2.48561e-50
					CENPN	-0.986913	6.86063e-50
					FEN1	-0.842708	6.94156e-50
					PUS1	-0.610615	7.76326e-50
					CEP55	-1.07796	8.02858e-50
					CDC45	-0.817673	8.48933e-50
					PTCD3	-0.506185	8.52615e-50
					BLM	-0.719586	1.4874e-49
					E2F8	-1.02265	1.66539e-49
					PLK4	-0.735271	1.73967e-49
					CCNB1	-1.06341	1.87953e-49
					ASF1B	-0.767374	2.42713e-49
					SAPCD2	-0.811735	2.59452e-49
					CCNF	-0.636652	3.00434e-49
					LMNB2	-0.69682	3.73269e-49
					HSPE1	-0.632703	4.44838e-49
					FOXM1	-1.04466	4.49342e-49
					NUF2	-1.15296	4.58458e-49
					DSN1	-0.769027	6.88069e-49
					RAD54L	-0.64271	1.15039e-48
					CCNB2	-0.821856	1.52013e-48
					KIF20A	-0.949764	1.5547e-48
					LIG1	-0.595868	1.75319e-48
					CHEK1	-1.01908	1.97428e-48
					POLE2	-0.938274	2.1252e-48
					GINS3	-0.713588	3.16713e-48
					RRM2	-1.03627	3.88819e-48
					RFWD3	-0.720027	5.11704e-48
					EXOSC2	-0.594277	5.62589e-48
					NCAPD2	-0.748959	6.79546e-48
					NUSAP1	-0.84618	6.93197e-48
					RAD51AP1	-1.00748	6.93197e-48
					NUP205	-0.619212	7.36228e-48
					AHCY	-0.798646	7.8309e-48
					C10orf2	-0.651324	9.65947e-48
					TOP2A	-1.27553	1.93886e-47
					MYBL2	-0.831391	3.09196e-47
					KIF11	-1.0593	3.68029e-47
					MRPL3	-0.447325	3.71889e-47
					FANCI	-0.928848	5.70303e-47
					TRAP1	-0.64212	7.17771e-47
					ESPL1	-0.606703	8.13581e-47
					GABARAPL1 /// GABARAPL3	0.81734	1.40796e-46
					FBXO45	-0.591741	1.4273e-46
					OIP5	-1.02033	1.96125e-46
					NEIL3	-0.744214	1.99187e-46
					MIS18A	-0.71949	2.4651e-46
					GMPS	-0.56367	2.54342e-46
					CKS2	-0.841113	2.55669e-46
					POLA1	-0.744303	2.76217e-46
					HMMR	-1.03059	3.23563e-46
					GEMIN5	-0.588678	3.23563e-46
					CCNE1	-0.757373	3.5519e-46
					TOPBP1	-0.628424	4.15725e-46
					NAT10	-0.559755	4.63809e-46
					BORA	-0.785661	4.63809e-46
					LYAR	-0.795559	5.29364e-46
					MCM3	-0.626226	9.76603e-46
					TOMM34	-0.697556	1.90339e-45
					FIGNL1	-0.851584	2.09913e-45
					WDR43	-0.694693	2.20729e-45
					RBM28	-0.623125	2.24699e-45
					MARS2	-0.735806	2.63716e-45
					ORC1	-0.76004	4.70132e-45
					NUP107	-0.593853	6.24455e-45
					E2F7	-1.1866	7.7954e-45
					BIRC5	-0.819791	1.05664e-44
					KNTC1	-0.754167	1.16636e-44
					URB2	-0.538772	1.30491e-44
					MIR4745 /// PTBP1	-0.383257	1.56466e-44
					PTTG1	-0.788779	2.24063e-44
					RUVBL1	-0.666848	2.50013e-44
					ATAD5	-0.379917	2.55531e-44
					PRKDC	-0.777448	6.3328e-44
					RFC5	-0.798067	8.59474e-44
					PTBP1	-0.369615	1.17903e-43
					NARS2	-0.583741	1.28118e-43
					CD3EAP	-0.652659	1.41396e-43
					SNRPF	-0.5997	1.41396e-43
					POLR2D	-0.553389	1.75882e-43
					SGOL2	-0.952646	2.03562e-43
					PAXIP1	-0.60597	2.82827e-43
					PNPT1	-0.6694	3.88741e-43
					TTI1	-0.780132	4.57375e-43
					RAD18	-0.56147	5.31654e-43
					TICRR	-0.58209	7.14831e-43
					TMPO	-0.730648	1.14967e-42
					UMPS	-0.499791	1.27479e-42
					WDR77	-0.659237	1.90614e-42
					BRIX1	-0.556701	2.00164e-42
					GABARAPL1	0.482552	2.19429e-42
					DNAJA3	-0.5013	2.38308e-42
					TIMM8A	-0.629672	3.24622e-42
					CDCA8	-0.7045	3.76598e-42
					LMNB1	-0.786638	3.78489e-42
					GYPC	0.649289	4.10825e-42
					TMEM140	0.788205	4.47902e-42
					FAM114A1	0.714791	5.1423e-42
					UHRF1	-0.890332	7.88683e-42
					ACTL6A	-0.591449	8.85477e-42
					ASPM	-1.0501	1.24324e-41
					JAM2	0.86716	1.34312e-41
					HMGB3	-0.714833	1.43349e-41
					NOP14	-0.525355	1.62485e-41
					JADE3	-0.823418	1.96592e-41
					DHX9	-0.356858	2.13893e-41
					MAD2L1	-1.03507	2.7213e-41
					HMGB2	-0.648484	3.52405e-41
					E2F1	-0.398805	3.8504e-41
					POLA2	-0.588848	4.10812e-41
					NUP160	-0.640715	4.7825e-41
					ANLN	-1.04311	4.7825e-41
					CKAP5	-0.553722	4.81462e-41
					EXOSC7	-0.476509	6.8283e-41
					TMEM97	-0.92162	7.41614e-41
					POLD2	-0.615618	8.70359e-41
					PLK1	-0.751893	1.43561e-40
					NCL	-0.41	1.68706e-40
					NUP43	-0.498204	1.76564e-40
					FAM72A /// FAM72B /// FAM72C /// FAM72D	-1.05752	1.86334e-40
					ATIC	-0.500315	1.94077e-40
					EXOSC8	-0.637764	1.97341e-40
					CDK5RAP1	-0.521506	2.01077e-40
					KIF18A	-0.824854	2.30534e-40
					MRPS17	-0.593021	2.32652e-40
					BZW2	-0.500552	2.54142e-40
					POLR1A	-0.457315	2.80556e-40
					NME1	-0.732275	2.8858e-40
					CCT6A	-0.585989	3.05457e-40
					DLGAP5	-1.05751	3.52656e-40
					RPIA	-0.559855	3.72095e-40
					DDX39A	-0.548127	3.73199e-40
					AHNAK	0.692065	3.8728e-40
					SNRPA	-0.498991	4.1904e-40
					IFRD2	-0.520446	5.82596e-40
					SYNE1	0.831863	1.10604e-39
					PAFAH1B3	-0.659904	1.33816e-39
					FBL	-0.534307	1.80064e-39
					KIAA0247	0.487815	1.85843e-39
					HSPD1	-0.690915	1.86528e-39
					SLC25A15	-0.630984	2.55276e-39
					MKI67	-0.754838	2.58538e-39
					LY86	0.679722	3.33613e-39
					ECT2	-0.942036	3.57983e-39
					PRC1	-0.821179	3.72141e-39
					UNG	-0.604788	4.46194e-39
					GCSH /// LOC101060817	-0.66768	4.64641e-39
					IL1R1	0.954171	5.21311e-39
					CDT1	-0.833231	5.35308e-39
					PPAP2A	0.750973	5.82415e-39
					SHCBP1	-0.84781	7.23133e-39
					HNRNPA2B1	-0.338115	7.47233e-39
					C16orf59	-0.456537	7.72132e-39
					POC1A	-0.546321	9.20699e-39
					POP1	-0.677876	9.4989e-39
					LTV1	-0.503924	1.41267e-38
					KIF20B	-0.541877	1.4666e-38
					PRMT3	-0.773923	1.87005e-38
					FARSA	-0.431313	2.05143e-38
					AURKB	-0.83072	2.08035e-38
					TMEM41A	-0.511297	2.25562e-38
					LARS2	-0.469034	2.66053e-38
					CDCA7	-0.982597	2.82684e-38
					ATAD2	-1.02966	2.87139e-38
					TSEN54	-0.395429	3.10057e-38
					DNMT1	-0.650095	3.11803e-38
					CCT7	-0.425979	3.53735e-38
					LINC01140	0.568398	3.53735e-38
					KIFC1	-0.503902	3.88085e-38
					TROAP	-0.581095	4.74348e-38
					GAR1	-0.415159	5.15809e-38
					CCNE2	-0.972085	5.69925e-38
					MCM4	-0.760652	6.09103e-38
					CDC20	-0.902317	6.18227e-38
					LBR	-0.585405	6.23463e-38
					FOLR2	0.554772	6.76563e-38
					GNL3 /// SNORD19B	-0.568727	8.11628e-38
					MAGOHB	-0.619187	9.1307e-38
					BRCA2	-0.730111	1.03267e-37
					SLC5A6	-0.804855	1.05485e-37
					CSTF3	-0.450819	1.3233e-37
					SF3B3	-0.534964	1.40442e-37
					ODC1	-0.714869	1.46963e-37
					CENPH	-0.796813	1.69062e-37
					CCDC86	-0.632021	1.74288e-37
					KNSTRN	-0.666022	1.89026e-37
					NOL11	-0.547612	2.11346e-37
					XPOT	-0.625786	2.11848e-37
					NKRF	-0.515013	2.15805e-37
					PSMA7	-0.548086	2.20463e-37
					VRK1	-0.702812	2.25317e-37
					CDKN3	-0.930007	2.25317e-37
					DDX55	-0.563257	2.69861e-37
					C5orf34	-0.604625	2.86746e-37
					NR2C2AP	-0.390442	3.52619e-37
					CKS1B	-0.59487	3.60431e-37
					PIGX	-0.545905	3.72524e-37
					NUP37	-0.598354	3.8521e-37
					MASTL	-0.721513	3.87414e-37
					MSH2	-0.824702	3.98605e-37
					COLEC12	1.19524	4.4235e-37
					MRPL48	-0.45498	4.5091e-37
					SMC2	-0.845737	5.04491e-37
					KIAA0101	-0.839364	5.59807e-37
					NUP85	-0.507196	5.91926e-37
					CHD7	-0.676449	7.00601e-37
					RPP40	-0.707507	8.01037e-37
					CIRH1A	-0.558649	9.78264e-37
					KIF14	-0.888041	1.00805e-36
					CDCA4	-0.591214	1.02368e-36
					H2AFX	-0.653373	1.0248e-36
					FLVCR1	-0.804996	1.09167e-36
					SASS6	-0.484049	1.17444e-36
					PRPF19	-0.461202	1.24161e-36
					RRS1	-0.576493	1.36532e-36
					CCDC80	0.772063	1.37946e-36
					CIT /// MIR1178	-0.5829	1.4166e-36
					ZFYVE1	0.409024	1.42903e-36
					MRTO4	-0.592735	1.42903e-36
					TFAM	-0.630268	1.50827e-36
					NIFK	-0.481649	1.76529e-36
					NAA25	-0.652157	1.76529e-36
					BCL2L12	-0.570911	1.86286e-36
					CHTF18	-0.583099	1.89364e-36
					RBM12	-0.399798	2.16586e-36
					LINC01279	1.44574	2.31557e-36
					ZBED4	-0.530501	2.548e-36
					H2AFZ	-0.487422	2.84549e-36
					EVI2B	1.07996	3.9435e-36
					MGP	1.5151	4.05444e-36
					MAPKAPK5	-0.465764	4.12667e-36
					HMGB3P1	-0.559718	5.99066e-36
					FAM136A /// LOC100287852	-0.40965	7.07321e-36
					BRIP1	-0.663626	7.20882e-36
					ZMYND19	-0.526674	7.20882e-36
					LAS1L	-0.541052	7.2114e-36
					CSTF1	-0.596292	7.45869e-36
					PTTG3P	-0.455003	7.84291e-36
					EPAS1	0.599793	8.54181e-36
					DENR	-0.459681	8.91222e-36
					BEND3	-0.432724	9.53635e-36
					PDSS1	-0.650832	9.75279e-36
					PALB2	-0.482719	1.02622e-35
					BYSL	-0.578457	1.12127e-35
					GGTA1P	0.810093	1.16731e-35
					C4orf46	-0.852188	1.22795e-35
					TAMM41	-0.499777	1.41445e-35
					UTP18	-0.537125	1.44738e-35
					NOP2	-0.557459	1.64084e-35
					IARS	-0.509764	1.98849e-35
					SYNPO	0.682887	2.63504e-35
					PIGW	-0.670434	3.05099e-35
					DHFR	-0.695607	3.56889e-35
					CCDC59	-0.54377	4.45905e-35
					CD37	0.95374	4.83074e-35
					NOM1	-0.556082	5.17708e-35
					PPM1H	-0.968059	5.65126e-35
					ZFPM2	0.987312	5.82184e-35
					LRP8	-0.864549	6.30444e-35
					AOC3	1.17693	7.12545e-35
					HAUS7	-0.604718	7.19443e-35
					XPO1	-0.410852	7.30751e-35
					FBXO32	1.18806	7.50146e-35
					RAE1	-0.640096	9.02182e-35
					MRPS23	-0.622114	9.40024e-35
					PNRC1	0.394666	9.841e-35
					CCT4	-0.4166	1.09767e-34
					PIGU	-0.647038	1.18539e-34
					NUP35	-0.59023	1.21999e-34
					NOP58	-0.575853	1.40372e-34
					PSRC1	-0.744064	1.47747e-34
					CENPE	-0.88123	1.6872e-34
					NUDT1	-0.611775	1.69957e-34
					HELLS	-0.955751	1.71885e-34
					UBE2S	-0.861635	1.72221e-34
					ELAVL1	-0.315605	1.78606e-34
					TK1	-0.76834	2.14793e-34
					MYC	-0.858147	2.48369e-34
					DCUN1D5	-0.640622	2.73907e-34
					LSM7	-0.452778	2.82129e-34
					TACC3	-0.638345	2.82977e-34
					SLBP	-0.473862	3.07547e-34
					OLA1	-0.41525	3.12608e-34
					PPIL1	-0.62643	3.39882e-34
					NR3C1	0.912659	3.57949e-34
					NIT2	-0.509917	3.6748e-34
					GRPEL2	-0.606994	4.38824e-34
					CHAF1B	-0.443469	4.49775e-34
					DONSON	-0.664363	4.57607e-34
					SRPX	1.31935	4.88603e-34
					DEPDC1	-0.770673	5.15584e-34
					XPO4	-0.661143	5.53273e-34
					EMC8	-0.42473	5.57743e-34
					CNRIP1	0.819474	6.23436e-34
					CDK4	-0.595751	6.29631e-34
					PNO1	-0.61186	7.14567e-34
					CENPK	-0.951163	7.59463e-34
					XPO5	-0.525934	7.78515e-34
					CFH	1.08079	8.14573e-34
					NUP155	-0.610633	8.65345e-34
					EBNA1BP2 /// MIR6733	-0.535682	8.73741e-34
					SPARCL1	1.13287	8.96741e-34
					RMI1	-0.606389	9.05147e-34
					CSF1R	0.713762	9.1376e-34
					PPIH	-0.492907	9.70792e-34
					PLAGL2	-0.775914	1.04467e-33
					RRP9	-0.505962	1.08088e-33
					CENPM	-0.684262	1.08585e-33
					DCLRE1A	-0.489766	1.08726e-33
					NELFCD	-0.676832	1.10795e-33
					PRIM2	-0.540183	1.10947e-33
					TPSB2	1.16401	1.13662e-33
					FANCG	-0.535485	1.40279e-33
					LOC101060521 /// POLR3E	-0.456371	1.67786e-33
					LOC150776 /// SMPD4	-0.46192	1.73116e-33
					CHCHD6	-0.468382	1.73116e-33
					TXNIP	0.905999	1.73613e-33
					LHFPL2	0.490787	1.73667e-33
					NIP7	-0.553593	1.79029e-33
					CDK2	-0.617739	1.86113e-33
					PDCD2L	-0.615734	1.86543e-33
					SUV39H1	-0.558868	2.04808e-33
					WBP1L	0.419071	2.11647e-33
					HAUS6	-0.647694	2.85817e-33
					TPSAB1	1.16792	2.90532e-33
					NOP16	-0.573197	3.13641e-33
					CENPW	-0.726918	3.23502e-33
					SDCCAG3	-0.416609	3.35731e-33
					EXOSC5	-0.522974	3.38401e-33
					SPIN4	-0.761562	3.40858e-33
					RECQL4	-0.496611	3.96356e-33
					CENPL	-0.619738	5.49107e-33
					SLC7A5	-1.02516	5.59342e-33
					SLC9A9	0.456254	5.95441e-33
					HPGDS	0.610427	6.14276e-33
					NOLC1	-0.562162	6.754e-33
					MZT1	-0.720923	7.40047e-33
					CCL14 /// CCL15-CCL14	0.736684	7.53665e-33
					WDHD1	-0.497416	8.95829e-33
					NANP	-0.699743	8.98124e-33
					PHB	-0.513815	9.32493e-33
					CD59	0.581128	9.32493e-33
					CNOT10	-0.376013	9.60385e-33
					MALSU1	-0.403093	9.70775e-33
					MIR636 /// SRSF2	-0.35727	1.02294e-32
					TPSAB1 /// TPSB2	1.19115	1.03009e-32
					NUP93	-0.475391	1.03088e-32
					PDRG1	-0.531093	1.05106e-32
					ZNF280C	-0.594971	1.09662e-32
					ORC2	-0.489243	1.16662e-32
					CPSF6	-0.348802	1.17841e-32
					SSRP1	-0.444453	1.22779e-32
					POLR1C	-0.454808	1.3184e-32
					METTL1	-0.43138	1.34885e-32
					TMEM194A	-0.625685	1.47454e-32
					SFRP2	1.89278	1.56667e-32
					DAZAP1	-0.420554	1.57448e-32
					TXLNG	-0.679253	1.6058e-32
					MMP28	0.95618	1.66469e-32
					LIX1L	0.668959	1.86567e-32
					PTRH2	-0.503799	2.08822e-32
					LYVE1	0.788392	2.26783e-32
					POLQ	-0.748655	2.29588e-32
					C14orf132	0.765339	2.32121e-32
					POLR3K	-0.562395	2.45261e-32
					TSPAN4	0.533565	2.53328e-32
					SLC25A33	-0.605402	2.53516e-32
					EFEMP1	1.30911	2.62648e-32
					GABARAP	0.359849	2.84711e-32
					HSPA14	-0.582297	3.01268e-32
					NHP2	-0.448005	3.4503e-32
					TUBG1	-0.6123	3.68965e-32
					CTSO	0.744739	3.70423e-32
					ALG8	-0.461177	3.81388e-32
					CALHM2	0.579773	4.07454e-32
					EIF3B	-0.493188	4.56546e-32
					NDUFAF4	-0.48643	4.56546e-32
					RPS21	-0.321294	4.66726e-32
					ANK2	1.05571	4.76568e-32
					PTGES3	-0.291009	5.0927e-32
					TCEAL7	0.886059	5.09321e-32
					SFXN4	-0.496934	5.12008e-32
					UTP20	-0.521463	5.16811e-32
					ALG11 /// UTP14A /// UTP14C	-0.498291	5.63317e-32
					PEG3	0.717227	5.63317e-32
					DNMT3B	-0.621876	5.72511e-32
					ACACA	-0.490889	6.00241e-32
					MCM8	-0.8745	6.57427e-32
					TMEM177	-0.566383	7.63092e-32
					TCF19	-0.578429	7.8648e-32
					FTSJ2	-0.427423	7.94472e-32
					MRGBP	-0.636313	8.12204e-32
					ICT1	-0.504051	8.40681e-32
					DTYMK	-0.351971	1.01008e-31
					NOC4L	-0.43393	1.03241e-31
					POLD1	-0.459837	1.03934e-31
					C17orf75	-0.592376	1.16367e-31
					NFE2L3	-0.858235	1.17444e-31
					CDC123	-0.367047	1.18379e-31
					BARD1	-0.576545	1.35955e-31
					CILP	0.951543	1.40204e-31
					CRYAB	0.985438	1.4393e-31
					ASUN	-0.552351	1.68275e-31
					PSMG1	-0.777115	1.7251e-31
					FANCA	-0.555879	1.94135e-31
					ANKRD35	0.431456	2.17261e-31
					SNORA5B /// TBRG4	-0.456766	2.22005e-31
					PINK1	0.476362	2.3522e-31
					DDX51	-0.475378	2.4311e-31
					SNRPG	-0.39753	2.55212e-31
					ENOPH1	-0.471255	2.59079e-31
					DARS2	-0.447384	2.62018e-31
					PLCL2	0.884833	2.80819e-31
					PAK1IP1	-0.523368	2.91906e-31
					LOC101060264	-0.94933	3.73701e-31
					LOC729680	-0.864748	3.75542e-31
					PDE12	-0.553429	3.98684e-31
					FEZ1	0.792902	4.11987e-31
					CEP72	-0.70915	4.42377e-31
					SNRPA1	-0.487614	4.42607e-31
					NIF3L1	-0.364995	4.6779e-31
					GEMIN6	-0.468379	4.78622e-31
					PDLIM3	0.997832	4.84058e-31
					CCDC43	-0.444782	5.167e-31
					USP39	-0.340874	5.18158e-31
					KIF22	-0.524701	5.43886e-31
					SLIT2	1.03905	5.53074e-31
					PTGIS	1.30662	6.2998e-31
					ORC5	-0.496907	6.92634e-31
					SCN1B	0.337312	6.94813e-31
					FAM214B	0.43178	7.30116e-31
					AATF	-0.409531	7.32134e-31
					EIF1AX	-0.660295	7.73739e-31
					CECR5	-0.467791	8.74094e-31
					YTHDF1	-0.500795	8.83333e-31
					FBLN5	0.782642	9.23212e-31
					MAMDC2	0.953092	9.3029e-31
					AIMP2	-0.394541	1.03511e-30
					C1R	0.946911	1.07665e-30
					DDX21	-0.620228	1.15326e-30
					FOPNL	-0.462837	1.1642e-30
					BHLHE41	1.14137	1.18462e-30
					C7	1.22759	1.19765e-30
					ZNRF3	-0.904278	1.22108e-30
					CLNS1A	-0.399655	1.28851e-30
					CACYBP	-0.40821	1.29892e-30
					MS4A7	1.14393	1.31184e-30
					NAPSB	0.650536	1.5996e-30
					CFH /// CFHR1	0.998861	1.63917e-30
					LOC100996643 /// LOC101928195 /// MTHFD1L	-0.780995	1.82153e-30
					TEX30	-0.716103	2.09249e-30
					C1orf109	-0.45539	2.30755e-30
					BOC	0.552444	2.32105e-30
					SCG2	1.00657	2.32468e-30
					RMI2	-0.650715	2.35654e-30
					ARHGAP11A	-0.568727	2.43146e-30
					F13A1	1.17924	2.4903e-30
					RPL7L1	-0.380912	2.70846e-30
					GLO1	-0.444081	2.76381e-30
					DDX18	-0.494842	2.82816e-30
					CD14	0.978773	3.10493e-30
					ARHGEF6	0.617351	3.18375e-30
					IGF1	1.08645	3.32028e-30
					BOP1 /// MIR7112	-0.810209	3.78782e-30
					PRPF4	-0.412837	3.80103e-30
					GPX3	1.24481	3.82895e-30
					PSMD14	-0.372753	3.88548e-30
					MSH6	-0.511807	3.89442e-30
					FHL1	0.944667	3.89798e-30
					SIGMAR1	-0.495557	4.05222e-30
					TRMT61B	-0.445243	4.13133e-30
					ASAP3	0.467281	4.18867e-30
					DPH2	-0.398195	4.52968e-30
					RFC2	-0.546169	4.97288e-30
					PLAC9	0.535321	5.11514e-30
					UBA2	-0.490586	5.33548e-30
					CSTF2	-0.447136	5.63886e-30
					GTSE1 /// TRMU	-0.491598	5.63886e-30
					RPN2	-0.456546	5.85949e-30
					CCT5	-0.395615	6.32717e-30
					C19orf48 /// SNORD88C	-0.612163	6.52626e-30
					ZNF473	-0.493215	6.96268e-30
					LOC728392	0.592537	7.31303e-30
					RIOK1	-0.475525	7.32903e-30
					CENPU	-0.854492	7.38588e-30
					PALMD	0.723446	7.44986e-30
					LOC284926	-0.590473	7.62083e-30
					ERAL1	-0.444955	7.77962e-30
					ZNF667-AS1	0.648547	7.77962e-30
					METTL2A /// METTL2B	-0.525502	7.77962e-30
					RNPS1	-0.331637	7.78191e-30
					PDCD11	-0.396916	8.44772e-30
					SMARCD2	-0.409426	8.54989e-30
					IFFO1	0.390432	9.09345e-30
					ADH1B	1.75247	9.31608e-30
					MFAP4	0.866058	1.07901e-29
					SAC3D1	-0.586243	1.17973e-29
					EPT1	-0.721749	1.28024e-29
					TRMT10C	-0.513654	1.28525e-29
					ABCE1	-0.54469	1.34563e-29
					ANAPC7	-0.602736	1.42765e-29
					HNRNPD	-0.368364	1.43088e-29
					SNRPD3	-0.37517	1.60456e-29
					RCC1	-0.560379	1.66987e-29
					ADSL	-0.431161	1.72378e-29
					FARSB	-0.368732	1.73557e-29
					BNC2	0.752128	1.78382e-29
					EVI2A	0.946776	1.89486e-29
					DUS1L	-0.408985	1.99498e-29
					POLR1B	-0.408142	2.04151e-29
					AMICA1	0.538828	2.10622e-29
					EEF1E1	-0.618291	2.10652e-29
					ADRB2	0.485902	2.11572e-29
					ARHGEF39	-0.509028	2.3179e-29
					SGK1	0.946628	2.43843e-29
					CLEC3B /// EXOSC7	0.867072	2.44232e-29
					MIR22 /// MIR22HG	0.834126	2.47638e-29
					CDC7	-0.795292	2.52014e-29
					NDN	0.921318	2.64918e-29
					CCL19	1.1258	2.67363e-29
					ARHGAP31	0.502521	2.67363e-29
					HAUS7 /// TREX2	-0.663374	2.84826e-29
					CCNJ	-0.529205	2.91312e-29
					FABP4	1.44729	3.29925e-29
					CD1D	0.625467	3.85153e-29
					TIPIN	-0.766923	3.92371e-29
					ZW10	-0.388754	4.22159e-29
					NOC3L	-0.54551	4.4022e-29
					CLIP3	0.541106	5.40964e-29
					DPEP2	0.415645	5.84425e-29
					PBK	-1.07413	6.09386e-29
					RBBP7	-0.441299	6.22746e-29
					MFAP5	1.29723	7.28586e-29
					AIFM1	-0.496595	7.87586e-29
					SKA1	-0.706711	8.01426e-29
					TNFSF12 /// TNFSF12-TNFSF13	0.415356	8.1852e-29
					CD63	0.285467	9.09118e-29
					LSP1	0.584413	9.25014e-29
					TCN2	0.453461	9.25014e-29
					DUSP1	0.923454	9.48816e-29
					DCLK1	0.621581	9.54557e-29
					ASCL2	-0.794069	1.00962e-28
					CTPS1	-0.62719	1.03284e-28
					TSHZ3	0.56086	1.08872e-28
					CEP78	-0.39966	1.10421e-28
					WEE1	-0.538569	1.1578e-28
					UBE2QL1	0.73986	1.17189e-28
					COG8 /// PDF	-0.402492	1.32013e-28
					POLE	-0.401564	1.43014e-28
					TRANK1	0.563988	1.43863e-28
					GTSE1	-0.489615	1.45885e-28
					PNPO	-0.528013	1.49344e-28
					LAGE3	-0.518369	1.60368e-28
					HMGB1	-0.445883	1.73355e-28
					ACKR1	0.93554	1.73355e-28
					RASSF2	0.743392	1.96958e-28
					DCN	1.05329	2.12029e-28
					MTHFD1	-0.484739	2.41282e-28
					MAGI2-AS3	0.587862	2.42922e-28
					FANCF	-0.50695	2.54959e-28
					ADRM1	-0.489389	2.69247e-28
					R3HDM1	-0.392733	2.7808e-28
					ACTR3B	-0.450995	2.80313e-28
					TBC1D30	-0.667118	2.80313e-28
					DFFB	-0.531213	2.92275e-28
					E2F6	-0.444247	3.07269e-28
					DACT3	0.590993	3.09225e-28
					UTP6	-0.383314	3.10855e-28
					GLIPR2	0.690582	3.49776e-28
					LPAR1	0.882523	3.83848e-28
					RTKN	-0.553492	3.87094e-28
					TP53RK	-0.757656	4.00231e-28
					PDP2	-0.376309	4.44286e-28
					CLDN5	0.50362	4.47415e-28
					CMTM8	-0.51488	4.51838e-28
					PXMP4	-0.464156	4.68187e-28
					ABLIM3	0.537888	4.8724e-28
					SPDL1	-0.575035	4.9008e-28
					YEATS4	-0.653742	5.36297e-28
					CPQ	0.70434	5.39546e-28
					MTERF3	-0.581205	5.42439e-28
					FAM64A	-0.58286	5.54675e-28
					MRPL37	-0.437364	5.61805e-28
					ZPR1	-0.393434	6.02771e-28
					POP7	-0.421664	6.28143e-28
					LOC728554 /// THOC3	-0.572695	6.33505e-28
					BCS1L	-0.358283	6.69404e-28
					MGC27345 /// RBM28	-0.351814	6.76048e-28
					ADK	-0.534932	7.314e-28
					DUS4L	-0.620566	7.47819e-28
					CHCHD3	-0.369461	7.47819e-28
					PASK	-0.308209	7.59246e-28
					DGKA	0.595914	7.86444e-28
					INTS2	-0.63892	8.05514e-28
					DDX49	-0.366678	8.8961e-28
					HEATR2	-0.500269	9.27408e-28
					TIMM13	-0.450067	9.92003e-28
					MTPAP	-0.463323	1.00112e-27
					MRE11A	-0.642442	1.05929e-27
					CHAF1A	-0.421238	1.09553e-27
					LMOD1	1.06061	1.17073e-27
					JAM3	0.710714	1.22876e-27
					TCERG1	-0.485543	1.24394e-27
					TARDBP	-0.286094	1.27602e-27
					BTK	0.463658	1.46915e-27
					SLC25A19	-0.334604	1.48218e-27
					CD48	0.79419	1.55202e-27
					TIMP2	0.710828	1.55748e-27
					NCKAP1L	0.526592	1.59585e-27
					HMGB1P4 /// HMGB1P4	-0.372569	1.61725e-27
					CHRNA3	0.740354	1.64475e-27
					GSS	-0.448477	1.80562e-27
					WDR5	-0.487898	1.8612e-27
					SFPQ	-0.368553	1.89384e-27
					ARMC10	-0.471303	1.92402e-27
					GMNN	-0.604708	1.94503e-27
					GPSM2	-0.843209	2.08466e-27
					THBS3	0.448838	2.11107e-27
					YPEL5	0.491068	2.28618e-27
					NDC80	-0.84497	2.35778e-27
					APITD1 /// APITD1-CORT	-0.550034	2.42599e-27
					FAM60A	-0.480958	2.62874e-27
					C20orf194	0.47972	2.64936e-27
					SNRPE	-0.432251	2.65439e-27
					EBP	-0.507729	2.65702e-27
					PCNA	-0.578077	2.68763e-27
					TSEN2	-0.608762	2.72724e-27
					SYNC	0.910702	2.72724e-27
					MEST	-0.571451	3.16818e-27
					EIF3M	-0.312103	3.33423e-27
					EIF4A3	-0.354744	3.55083e-27
					KDM2B	-0.441842	3.61397e-27
					CD52	0.82885	3.71446e-27
					DDR2	0.858211	3.77798e-27
					TOMM40	-0.391838	4.18907e-27
					TCOF1	-0.470906	4.2149e-27
					NSUN2	-0.376411	4.31361e-27
					TTC27	-0.437731	4.44394e-27
					NUFIP1	-0.572623	4.63829e-27
					MIR943 /// NELFA	-0.348544	4.71244e-27
					SNRPC	-0.325243	4.88098e-27
					ADAM28	0.938712	5.22445e-27
					ANKRD16	-0.456673	5.33629e-27
					KIAA1524	-0.360305	5.40679e-27
					LSM8	-0.439844	5.45413e-27
					CCDC107	0.346236	5.67748e-27
					PRELP	0.790214	6.50038e-27
					SNORA29 /// TCP1	-0.356797	6.88977e-27
					FXYD6	0.859717	7.21081e-27
					PHYKPL	0.462046	7.60631e-27
					GSG2	-0.444738	7.91484e-27
					PCID2	-0.431891	8.14322e-27
					RPSA /// RPSAP19 /// RPSAP58 /// RPSAP9 /// SNORA6 /// SNORA62	-0.227198	8.58843e-27
					LOC101928927 /// SNHG15 /// SNORA9	-0.464611	8.65997e-27
					HSPB2	0.403888	8.74399e-27
					TEAD4	-0.44472	9.08623e-27
					IPO5	-0.630115	9.50776e-27
					PLN	1.27936	9.5132e-27
					KIAA1804	-0.636651	9.81036e-27
					MTCH2	-0.351967	9.93263e-27
					HLA-DPB1	0.96539	1.02419e-26
					SLC25A32	-0.579736	1.06567e-26
					EMG1	-0.440727	1.10615e-26
					PA2G4	-0.445868	1.10742e-26
					NDC1	-0.760451	1.13281e-26
					ASB2	0.590536	1.17214e-26
					PSAT1	-0.91901	1.19509e-26
					SLC7A6	-0.513802	1.3142e-26
					CDCA2	-0.814822	1.32966e-26
					KLF2	0.676971	1.32966e-26
					ZNF202	-0.403353	1.40271e-26
					PAM16	-0.420693	1.40271e-26
					LSM3	-0.355629	1.40326e-26
					RNF114	-0.441431	1.45785e-26
					MRPS30	-0.46742	1.46947e-26
					H2AFV	-0.375716	1.48295e-26
					YDJC	-0.414378	1.52512e-26
					ADNP	-0.464438	1.54268e-26
					TMPO-AS1	-0.354642	1.74114e-26
					RGS2	1.08912	1.83477e-26
					NCOA5	-0.476477	1.98003e-26
					TFDP1	-0.467404	2.05899e-26
					RPA3	-0.483855	2.06172e-26
					RSL1D1	-0.466097	2.06854e-26
					PSAP	0.470607	2.07152e-26
					IL10RA	0.71513	2.15094e-26
					DDX56	-0.423443	2.41587e-26
					LSM5	-0.565948	2.6148e-26
					TRIM28	-0.505464	2.74151e-26
					EIF2S2	-0.501776	2.76903e-26
					NUDT15	-0.53886	2.92415e-26
					TFDP2	-0.428814	3.10831e-26
					RDM1	-0.427269	3.10831e-26
					SPG20	0.760917	3.11067e-26
					GPN3	-0.45773	3.26706e-26
					MAGOH /// MAGOHB	-0.451072	3.63445e-26
					GARS	-0.451396	3.63464e-26
					RPGRIP1L	-0.529568	3.74299e-26
					RCSD1	0.667662	3.74299e-26
					TSPYL5	0.754146	3.94694e-26
					TNXA /// TNXB	0.562592	4.10587e-26
					WDR75	-0.444366	4.12261e-26
					SERPINF1	0.98613	4.37689e-26
					MAFB	1.02772	4.38872e-26
					HCLS1	0.845777	4.55075e-26
					U2SURP	-0.496734	4.55725e-26
					SHMT2	-0.681101	4.66419e-26
					FAM83D	-0.722571	4.77075e-26
					ZNF74	-0.398823	5.05284e-26
					GPT2	-0.717353	5.21392e-26
					ENPP2	0.99091	5.48541e-26
					PRKCB	0.727713	5.71477e-26
					MYB	-0.749223	6.07062e-26
					BASP1	0.879643	6.17353e-26
					AGO2 /// CASC7 /// CASC7 /// DQ574852	-0.640702	6.34445e-26
					RRM1	-0.536582	6.8436e-26
					PRICKLE1	0.724075	7.05546e-26
					PKMYT1	-0.331849	7.26026e-26
					PLSCR4	0.754001	7.62018e-26
					SAAL1	-0.470677	7.85181e-26
					BRD7	-0.360093	8.10261e-26
					DDX20	-0.420572	8.80921e-26
					SCUBE2	0.639243	8.88729e-26
					THOC7	-0.349394	9.04572e-26
					NLE1	-0.40507	9.04649e-26
					METTL2B	-0.47196	9.07152e-26
					DPM1	-0.53441	9.09235e-26
					CD53	0.812012	1.02169e-25
					COPZ2	0.543075	1.0756e-25
					TUBGCP4	-0.444039	1.0756e-25
					KHDRBS1	-0.226975	1.07666e-25
					RP11-1094M14.11	-0.570675	1.12695e-25
					CAPN2	0.494246	1.14596e-25
					ATP5J2-PTCD1 /// PTCD1	-0.344019	1.14822e-25
					TMEM186	-0.334458	1.21527e-25
					CCT3 /// LOC101927137	-0.387182	1.24196e-25
					GID8	-0.444683	1.32277e-25
					CPM	1.12261	1.35923e-25
					ST6GALNAC6	0.715213	1.46783e-25
					ZWILCH	-0.708317	1.6097e-25
					PPM1G	-0.345353	1.61668e-25
					DAPK1	0.96691	1.61668e-25
					NPM3	-0.640838	1.81505e-25
					SMC4	-0.659811	1.81931e-25
					TMEM100	0.710072	1.82807e-25
					ABHD4	0.345088	1.87463e-25
					FCGR2B	0.978629	1.97633e-25
					NAF1	-0.482566	2.11854e-25
					PBXIP1	0.392353	2.16326e-25
					BUB3	-0.506202	2.19047e-25
					MIEF1	-0.347651	2.19927e-25
					2021-03-02	0.538527	2.2205e-25
					ALG3	-0.378193	2.22344e-25
					SRSF10	-0.576276	2.28532e-25
					SEPHS1	-0.429577	2.32305e-25
					TUBA4A	-0.465035	2.36557e-25
					LRRC58	-0.495401	2.47515e-25
					CCT2	-0.563859	2.63222e-25
					SPON1	1.23788	2.64792e-25
					MRPL36	-0.400866	2.68579e-25
					LOC101929240 /// SNRNP200	-0.328975	2.8149e-25
					EPHB2	-0.604586	2.86285e-25
					RHNO1	-0.497137	2.90977e-25
					MRPL45	-0.41287	2.94738e-25
					KLHDC1	0.365525	3.05185e-25
					LMO2	0.56566	3.23103e-25
					UBAP2L	-0.409525	3.30212e-25
					PRPS2	-0.503824	3.33413e-25
					FASN	-0.663787	3.44585e-25
					MIPEP	-0.49262	3.47368e-25
					SRSF3	-0.385206	3.60605e-25
					NUP133	-0.37199	3.72456e-25
					STARD7	-0.266126	3.80052e-25
					SETD6	-0.48197	3.92462e-25
					LOC400043	0.47621	3.92462e-25
					REPIN1	-0.46783	4.10697e-25
					SGCE	0.904373	4.22197e-25
					C1orf54	0.572592	4.49855e-25
					NUP153	-0.422002	4.49855e-25
					RHOC	0.473457	4.5157e-25
					TCEAL3	0.631193	4.82597e-25
					MYOF	0.617034	4.94401e-25
					KARS	-0.322312	5.1131e-25
					C16orf13	-0.503627	5.55589e-25
					ZC3H8	-0.516018	5.55589e-25
					HDAC2	-0.450065	5.90527e-25
					TOMM5	-0.436241	6.03926e-25
					CCDC137	-0.442473	6.08834e-25
					RPRD1B	-0.454125	6.0967e-25
					CCPG1 /// DYX1C1-CCPG1	0.564856	6.22825e-25
					SETBP1	0.664631	6.25491e-25
					DUS3L	-0.455351	6.36394e-25
					SHQ1	-0.327029	6.50684e-25
					RAN	-0.483249	6.734e-25
					PXYLP1	-0.544579	7.05466e-25
					LONP1	-0.443062	7.27477e-25
					C2orf74 /// KIAA1841	0.499576	7.27822e-25
					NFXL1	-0.551465	7.27822e-25
					SSX2IP	-0.56478	7.7023e-25
					U2AF1	-0.286583	8.18056e-25
					NAE1	-0.408875	8.19603e-25
					MIR100HG	1.033	8.99154e-25
					NUDT19	-0.428244	9.01924e-25
					MED30	-0.495331	9.08434e-25
					RCC2	-0.36891	9.56229e-25
					TDP1	-0.45596	9.97844e-25
					CHL1	0.594515	1.08111e-24
					FAM107A	0.302987	1.13766e-24
					HLX	0.503256	1.23867e-24
					HMBS	-0.410125	1.255e-24
					CLMP	1.03014	1.3879e-24
					DHX33	-0.431356	1.41951e-24
					PPRC1	-0.472187	1.47313e-24
					CPEB1	0.301969	1.49681e-24
					RNASEH1-AS1	-0.515651	1.49681e-24
					CD36	0.935514	1.49681e-24
					ZNF121	-0.546446	1.70052e-24
					C2orf40	0.710021	1.75039e-24
					PRIMA1	0.65073	1.82395e-24
					GOT2	-0.345286	1.84275e-24
					FZD1	0.574735	1.98571e-24
					TYROBP	0.915172	2.11523e-24
					UTP15	-0.395269	2.25258e-24
					WDR90	-0.551942	2.27755e-24
					TGIF2	-0.555753	2.34888e-24
					LY96	1.01762	2.48097e-24
					PLEKHO1	0.678841	2.49265e-24
					HSPB8	0.947209	2.70882e-24
					LOC100996724 /// LOC100996761 /// LOC101929792 /// LOC101930416 /// PDE4DIP	0.439377	2.84793e-24
					LOC101927137 /// SCLT1	-0.529089	2.98989e-24
					NCR3LG1 /// RP1-239B22.5	-0.762667	3.06116e-24
					NAA10	-0.451868	3.07452e-24
					RNF219	-0.569813	3.20836e-24
					CTSG	0.471495	3.42405e-24
					CDK14	0.705823	3.47539e-24
					PDLIM2	0.575583	3.71472e-24
					MRPL17	-0.412043	3.74097e-24
					COX7A1	0.692286	3.7772e-24
					PTDSS1	-0.456122	4.64855e-24
					C3	1.23144	4.67728e-24
					ARHGAP30	0.644239	4.77792e-24
					LXN	0.812225	4.89692e-24
					CPA3	1.19447	4.89692e-24
					NUDCD1	-0.600637	4.89692e-24
					SMPD1	0.503578	5.13368e-24
					SERBP1	-0.339459	5.2183e-24
					NAP1L3	0.721297	5.24089e-24
					GIMAP1	0.349134	5.30003e-24
					CDC23	-0.357936	5.39701e-24
					STON1	0.896359	5.6409e-24
					IGFBP6	0.723517	5.67845e-24
					PSMD12	-0.408821	5.78714e-24
					CHAMP1	-0.416719	5.90739e-24
					GMFG	0.565113	5.93407e-24
					PSMG4	-0.500026	6.10563e-24
					MIR1244-3	-0.171116	6.37107e-24
					CD180	0.345615	6.45162e-24
					DLEU1	-0.494667	6.54712e-24
					PJA2	0.501734	6.54963e-24
					RCAN2	0.716604	6.74131e-24
					SSB	-0.458343	6.77422e-24
					LDOC1	0.458012	6.88773e-24
					NUP62CL	-0.7367	6.90636e-24
					SLC25A10	-0.458699	7.27699e-24
					EMP3	0.758324	7.63269e-24
					EBPL	-0.469682	7.66157e-24
					GLT8D2	0.71872	8.00476e-24
					ARHGAP9	0.635478	8.10333e-24
					SMYD5	-0.365877	8.13527e-24
					TLCD1	-0.632702	9.06213e-24
					LINC01315	-0.595854	9.23402e-24
					MRPL4	-0.42191	9.32609e-24
					CBX7	0.454631	9.45111e-24
					BOLA3	-0.40823	9.60255e-24
					COA7	-0.311745	9.6045e-24
					FBXL7	0.499587	1.01347e-23
					MRPL57	-0.367862	1.01607e-23
					CCDC77	-0.470957	1.02097e-23
					CBX1	-0.38627	1.0356e-23
					ITM2B	0.324739	1.03847e-23
					ZNF696	-0.399257	1.06177e-23
					MTIF2	-0.414419	1.0801e-23
					UQCC1	-0.449228	1.09694e-23
					LRMP	0.574011	1.1159e-23
					SRPK1	-0.519493	1.15095e-23
					SUGCT	0.691143	1.16141e-23
					RP11-498C9.15	-0.526502	1.21036e-23
					DPY30 /// MEMO1	-0.347197	1.23324e-23
					MRPL11	-0.40987	1.265e-23
					NHP2P2 /// NHP2P2	-0.344253	1.26506e-23
					APTX	-0.351269	1.30603e-23
					SNRPD2	-0.335963	1.31295e-23
					CIDEB	0.492651	1.35412e-23
					C1S	1.15219	1.35426e-23
					PPAN /// PPAN-P2RY11	-0.323625	1.40735e-23
					GPSM3	0.379513	1.44873e-23
					NOL7	-0.308854	1.44968e-23
					C16orf91	-0.338117	1.46316e-23
					KLHL23 /// PHOSPHO2-KLHL23	-0.54767	1.54346e-23
					FCRLA	0.384694	1.6589e-23
					MTMR9LP	0.274067	1.71787e-23
					KATNB1	-0.378353	1.85901e-23
					KIAA1549	-0.55967	1.8619e-23
					FXN	-0.527089	1.92431e-23
					ACTR5	-0.376083	2.01464e-23
					C16orf80	-0.348348	2.03851e-23
					C2orf47	-0.342492	2.05993e-23
					BAZ1B	-0.322988	2.11993e-23
					DPT	0.731851	2.13517e-23
					C21orf59	-0.337079	2.14747e-23
					ITGAM	0.776987	2.22475e-23
					SERPING1	0.994252	2.30125e-23
					DDX54	-0.329662	2.32961e-23
					DDX27 /// SS18	-0.532133	2.33978e-23
					PES1	-0.343041	2.37484e-23
					FNBP1	0.676595	2.4857e-23
					NABP2	-0.468752	2.49149e-23
					FXYD1	0.549106	2.57599e-23
					CPSF4	-0.282667	2.71051e-23
					MRPS9	-0.362325	2.74399e-23
					SNHG1 /// SNORD22 /// SNORD25 /// SNORD26 /// SNORD27 /// SNORD28 /// SNORD29 /// SNORD30 /// SNORD31	-0.580779	2.75627e-23
					MEIS1	0.694757	2.83319e-23
					LTC4S	0.276215	3.04557e-23
					ANAPC5	-0.248967	3.04603e-23
					ZNF598	-0.376011	3.09705e-23
					CFD	1.05969	3.24651e-23
					STMN2	0.906331	3.27336e-23
					UBAP2	-0.393582	3.47116e-23
					HSD17B10	-0.430095	3.51591e-23
					PTTG1IP	0.354187	3.52787e-23
					C1QA	0.883309	3.72715e-23
					DIMT1	-0.365314	3.8178e-23
					ZNF670	-0.419418	3.82694e-23
					ZEB2	0.822084	4.0248e-23
					YPEL3	0.534569	4.04791e-23
					C12orf45	-0.412525	4.40168e-23
					NAA50	-0.386207	4.44843e-23
					BAALC	0.172207	4.76737e-23
					LOC101929336 /// RIF1	-0.513099	4.79083e-23
					LOC100289092	-0.350732	4.99208e-23
					RPUSD4	-0.379624	5.01931e-23
					RPS7	-0.290025	5.02881e-23
					E2F5	-0.672721	5.15444e-23
					AKAP8	-0.273283	5.3136e-23
					FUT4	-0.698009	5.43706e-23
					CCNDBP1	0.487372	5.48486e-23
					PODN	0.415169	5.56828e-23
					THOC2	-0.483668	5.92234e-23
					ETV4	-0.735299	6.05284e-23
					SLCO2A1	0.684575	6.07809e-23
					YARS2	-0.308617	6.39485e-23
					C11orf83	-0.476756	6.47083e-23
					MPLKIP	-0.363308	6.58957e-23
					MRPL9	-0.350848	6.83151e-23
					RBM15	-0.336672	7.15446e-23
					UCHL3	-0.519733	7.263e-23
					ZBTB9	-0.342064	7.84249e-23
					MRPS22	-0.323489	7.90486e-23
					SIDT2	0.345256	8.07205e-23
					ATR	-0.508462	8.3586e-23
					THAP10	-0.561117	8.3586e-23
					LOC100506248 /// LOC728026 /// MIR1244-1 /// MIR1244-2 /// MIR1244-3 /// PTMA	-0.283767	8.44619e-23
					NSDHL	-0.463629	8.77095e-23
					C10orf10	0.478462	8.88685e-23
					STOM	0.654822	8.9212e-23
					ZBTB39	-0.290094	8.95459e-23
					PRDM6	0.4205	9.11774e-23
					MT2A	0.814684	9.34276e-23
					PRDM4	-0.281931	9.45618e-23
					GAB3	0.34472	9.5369e-23
					NOB1	-0.43968	9.67665e-23
					PDHA1	-0.425266	9.78946e-23
					STT3B	-0.393499	1.00231e-22
					TFB1M	-0.389148	1.021e-22
					CNOT11	-0.263333	1.0732e-22
					MIOS	-0.38237	1.10589e-22
					SS18L2	-0.303856	1.17899e-22
					GRHL2	-0.480046	1.18353e-22
					LUC7L2	-0.368638	1.19214e-22
					ENOX2	-0.479423	1.22725e-22
					RPF2	-0.492522	1.25813e-22
					LOC101060363 /// PPIA	-0.18121	1.29746e-22
					PLD3	0.445026	1.30562e-22
					MTBP	-0.284288	1.36202e-22
					TRRAP	-0.428724	1.36304e-22
					PFAS	-0.49353	1.37678e-22
					C14orf169	-0.367308	1.41961e-22
					PPIA	-0.177987	1.42588e-22
					BRI3BP	-0.554069	1.42588e-22
					ZFP64	-0.358008	1.43878e-22
					PAK6	-0.59221	1.47147e-22
					CYBRD1	0.896587	1.59028e-22
					GAP43	0.549563	1.62349e-22
					PDCD5	-0.369366	1.63527e-22
					LOC81691	-0.467596	1.71551e-22
					ALOX5AP	0.86845	1.77246e-22
					ZSWIM8	0.348776	1.78429e-22
					OTUD6B	-0.650166	1.82542e-22
					LRR1	-0.506555	1.84949e-22
					USP6NL /// USP6NL-IT1	-0.5126	1.86843e-22
					PARS2	-0.356959	1.91136e-22
					NDUFS3 /// PTPMT1	-0.384142	1.91136e-22
					EVL	0.63661	1.97191e-22
					RPP38	-0.287272	1.98889e-22
					RSRC1	-0.558066	2.09166e-22
					SPATA2	-0.494008	2.16248e-22
					PUS7L	-0.371635	2.16992e-22
					RARRES2	0.799576	2.19112e-22
					POLD4	0.387523	2.21826e-22
					C17orf96	-0.399457	2.24373e-22
					EIF6	-0.458254	2.33059e-22
					TGS1	-0.444603	2.36655e-22
					CDKN2B	0.398174	2.40225e-22
					SKA2	-0.461541	2.48156e-22
					TP53INP1	0.652659	2.50626e-22
					GRN	0.394791	2.5383e-22
					KIAA1644	0.337639	2.61729e-22
					VSIG4	0.886322	2.64229e-22
					GIMAP4	0.607858	2.7898e-22
					CLCN5	-0.435127	2.79004e-22
					RP9 /// RP9P	-0.351053	2.79394e-22
					DHX37	-0.386201	2.83068e-22
					RPP30	-0.485553	2.84362e-22
					PRICKLE4 /// TOMM6	-0.299179	3.07709e-22
					SLC3A2	-0.434912	3.10058e-22
					ABCA6	0.338529	3.11914e-22
					OLFML1	0.616918	3.14036e-22
					PSMA1	-0.275865	3.17471e-22
					THUMPD3	-0.372276	3.23129e-22
					MDH2	-0.318908	3.2402e-22
					RPS2 /// SNORA64	-0.155986	3.24245e-22
					COIL	-0.39191	3.30139e-22
					LSG1	-0.308645	3.37667e-22
					IPO4	-0.539083	3.49242e-22
					DAAM2	0.420061	3.50274e-22
					DCTPP1	-0.376733	3.54918e-22
					GPALPP1	-0.44239	3.57997e-22
					MPEG1	0.88219	3.64081e-22
					VGLL3	0.394806	3.68744e-22
					ADORA3	0.482929	3.89373e-22
					LRP11	-0.510324	4.01047e-22
					ZNF551	-0.565183	4.05066e-22
					MRPS35	-0.37546	4.06023e-22
					GRPEL1	-0.417531	4.23551e-22
					ARMCX1	0.821183	4.40376e-22
					TMEM255A	0.477386	4.42774e-22
					ZNF239	-0.618776	4.42774e-22
					SUZ12 /// SUZ12P1	-0.398927	4.71832e-22
					FERMT3	0.556907	4.86256e-22
					CNTN4	0.548373	4.86264e-22
					NEGR1	0.355808	4.97551e-22
					VBP1	-0.426906	5.06373e-22
					CSRP1	0.568064	5.39765e-22
					ERI2	-0.481761	5.4172e-22
					RNF8	-0.328662	5.56644e-22
					SYNPO2	1.27413	6.10337e-22
					REXO4	-0.278388	6.19495e-22
					NUP188	-0.3212	6.21954e-22
					B3GALT4	0.384947	6.30299e-22
					TCF20	-0.325367	6.36555e-22
					LCP1	0.668363	6.36555e-22
					CIAPIN1	-0.385524	6.42131e-22
					FZD4	0.367997	6.56203e-22
					IL17RB	-0.740705	6.64226e-22
					ROR1	0.475202	6.81996e-22
					ANGPTL1	0.535229	7.05099e-22
					IMPDH2	-0.409262	7.05608e-22
					GTF2IRD1	-0.583375	7.19187e-22
					C1orf162	0.781944	7.68654e-22
					CYS1	0.547568	7.68654e-22
					OGFOD1	-0.342967	7.95887e-22
					MS4A6A	0.774314	7.99794e-22
					MRPL19	-0.495429	8.29738e-22
					AMOTL1	0.694349	8.35303e-22
					PDE2A	0.43452	8.35938e-22
					TPRKB	-0.443088	8.45544e-22
					HTR2B	0.85907	8.61713e-22
					IQCB1	-0.383057	8.62348e-22
					MRPL12	-0.424177	8.75469e-22
					MIR6883 /// PER1	0.456751	8.79579e-22
					POLDIP2	-0.317415	9.16342e-22
					TRMT61A	-0.291244	9.29291e-22
					MUSTN1 /// TMEM110 /// TMEM110-MUSTN1	0.461807	9.38114e-22
					LOC100288911	0.44866	9.3847e-22
					EPB41L3	1.06467	9.81421e-22
					CCT8	-0.377391	1.00114e-21
					MTHFD2	-0.577913	1.01047e-21
					APOD	1.16081	1.05109e-21
					PXDC1	0.517862	1.08452e-21
					BDKRB1	0.426782	1.10854e-21
					IMMP1L	-0.461854	1.1195e-21
					C3AR1	0.667592	1.12554e-21
					SLC16A7	0.741619	1.13037e-21
					EIF4E3	0.551718	1.15075e-21
					SDPR	0.608083	1.25543e-21
					EFS	0.603211	1.31845e-21
					CEP83	-0.615708	1.32746e-21
					SGOL1	-0.272119	1.42765e-21
					POLR2F	-0.3439	1.50193e-21
					PTMA	-0.144003	1.54113e-21
					SELPLG	0.486511	1.56598e-21
					GALNT15	0.444542	1.58652e-21
					FBRSL1	-0.508738	1.68877e-21
					VEGFC	0.634468	1.69308e-21
					NOL8	-0.438035	1.7808e-21
					FAM129A	0.717179	1.81826e-21
					ZNF777	-0.374025	1.81826e-21
					HGH1	-0.418251	1.836e-21
					SNRPD1	-0.465862	1.84654e-21
					mir-223	0.379952	1.84701e-21
					MTAP	-0.565767	1.86083e-21
					PDDC1	-0.335154	1.86867e-21
					DUT	-0.558277	1.86867e-21
					CCDC51	-0.375535	1.89648e-21
					TAF5L	-0.471786	1.89657e-21
					GMEB2	-0.347448	1.90515e-21
					CEP250	-0.33132	2.055e-21
					SNHG17	-0.696531	2.06312e-21
					CD4	0.431265	2.0684e-21
					MIR6716 /// PHLDB1	0.305407	2.07231e-21
					UNC5B	0.373793	2.07352e-21
					ATAD3A	-0.299754	2.10221e-21
					NCF1	0.508381	2.10221e-21
					CKAP2	-0.294436	2.10934e-21
					ZNF593	-0.477979	2.16089e-21
					PATZ1	-0.478169	2.18904e-21
					QSOX2	-0.346378	2.29171e-21
					C20orf24 /// TGIF2-C20orf24	-0.395451	2.29764e-21
					MXRA8	0.632801	2.33366e-21
					GPC6	0.533837	2.3373e-21
					CCDC69	0.661522	2.33831e-21
					PYCRL	-0.46751	2.34451e-21
					THBS4	0.857659	2.34451e-21
					LCLAT1	-0.384597	2.35221e-21
					WHSC1	-0.467202	2.38624e-21
					MED14	-0.413212	2.42398e-21
					PLAT	0.740179	2.43204e-21
					STOML2	-0.366491	2.46402e-21
					TSFM	-0.308816	2.46742e-21
					TRMT1	-0.403245	2.54085e-21
					NARR /// RAB34	0.76988	2.58224e-21
					TKT	-0.44786	2.59312e-21
					SNRNP25	-0.476366	2.66186e-21
					TAGLN	1.08693	2.69453e-21
					GYLTL1B	-0.561386	2.75113e-21
					RPL6	-0.193281	2.8284e-21
					TRUB1	-0.478528	2.83693e-21
					CHCHD2	-0.278996	2.94844e-21
					ITGB3BP	-0.543196	2.97844e-21
					CCDC176	0.418756	2.99738e-21
					ZNF326	-0.429983	2.99748e-21
					CSF2RB	0.868886	3.02251e-21
					PROSER1	-0.614171	3.08969e-21
					RP11-305E6.4	-0.458877	3.16759e-21
					PCBD1	-0.390455	3.43403e-21
					SLC25A39	-0.402138	3.44873e-21
					JAZF1	0.656046	3.48304e-21
					SCN4B	0.261981	3.50504e-21
					MIR3658 /// UCK2	-0.349869	3.5462e-21
					SUN2	0.270151	3.55935e-21
					EFEMP2	0.658898	3.61819e-21
					PTGDS	0.601499	3.78571e-21
					NUP98	-0.352082	3.79102e-21
					WISP2	0.513551	3.98069e-21
					DENND3	0.291781	3.99268e-21
					YAE1D1	-0.588906	4.06761e-21
					NKAP	-0.42371	4.13673e-21
					HOOK1	-0.502641	4.1682e-21
					MRGPRF	0.867858	4.2418e-21
					AX746755 /// RP11-774O3.3	0.419892	4.24321e-21
					PPAT	-0.727072	4.25251e-21
					TMA7	-0.219128	4.389e-21
					HNRNPR	-0.296834	4.45104e-21
					GGT5	0.493005	4.48155e-21
					HCK	0.671381	4.48155e-21
					LAPTM5	0.806878	4.48155e-21
					KAT2A	-0.356348	4.49735e-21
					SLC25A17	-0.366955	4.57486e-21
					THEM6	-0.553841	4.80663e-21
					GIMAP8	0.677633	4.90978e-21
					GGH	-0.858681	4.90978e-21
					RPP21 /// TRIM39 /// TRIM39-RPP21	-0.323079	5.00149e-21
					FANCB	-0.193236	5.07281e-21
					PLA2G5	0.262311	5.34023e-21
					SMS	-0.408221	5.68015e-21
					POLG2	-0.373262	5.76548e-21
					MCM5	-0.458522	5.8492e-21
					MCMBP	-0.349378	5.92891e-21
					ILF3	-0.466469	5.92891e-21
					GSPT1	-0.373877	6.00052e-21
					GTF2F2	-0.458227	6.23326e-21
					ARHGAP11B /// LOC100288637	-0.620411	6.48797e-21
					TBCE	-0.377121	6.51946e-21
					ACAD9	-0.285637	6.98231e-21
					PMPCA	-0.332041	7.15782e-21
					RRP1	-0.328964	7.30476e-21
					ROMO1	-0.428615	7.51848e-21
					MMACHC	-0.44885	7.52126e-21
					ITM2A	0.952711	7.52502e-21
					TPBG	0.750497	7.70206e-21
					TLR1	0.639468	7.72938e-21
					SLA	0.476679	7.75309e-21
					POFUT1	-0.255496	7.7711e-21
					WBSCR22	-0.358816	7.87663e-21
					ASNS	-0.698131	7.96737e-21
					MNX1-AS1	-0.498236	7.97152e-21
					CNN1	1.17304	7.98905e-21
					TBC1D31	-0.405292	8.14543e-21
					NPR3	0.509211	8.23289e-21
					PTPRM	0.589184	8.48181e-21
					COA4	-0.275837	8.49163e-21
					TMEM185B	-0.527478	8.62883e-21
					ASPA	0.445719	8.63929e-21
					FERMT2	0.905146	8.72117e-21
					LST1	0.484094	8.72117e-21
					FAM46A	0.639967	8.7242e-21
					MRPL32	-0.326319	9.1375e-21
					PYCR1	-0.399983	9.18947e-21
					CMC1	-0.40058	9.19862e-21
					CENPQ	-0.460007	9.28098e-21
					AK021804	1.05445	9.29091e-21
					MSN	0.651549	9.40077e-21
					LRRK2	0.436038	9.48048e-21
					METTL7A	0.885308	9.58193e-21
					MYO19	-0.351855	9.81793e-21
					FLI1	0.634493	1.03199e-20
					CHORDC1	-0.547782	1.04255e-20
					TAF5	-0.435522	1.04383e-20
					ZNF259P1 /// ZPR1	-0.424961	1.09727e-20
					LOC101928717 /// SLC19A1	-0.299907	1.18107e-20
					TMEM189 /// TMEM189-UBE2V1 /// UBE2V1 /// UBE2V2	-0.444293	1.188e-20
					NDUFAF2	-0.411516	1.19183e-20
					TENC1	0.411514	1.22379e-20
					CCDC113	-0.795046	1.24541e-20
					YARS	-0.404934	1.24548e-20
					FKBP1A-SDCBP2 /// SDCBP2	0.807858	1.35667e-20
					FAM189A2	0.329825	1.36419e-20
					SHFM1	-0.298948	1.36641e-20
					DDX46	-0.356765	1.37402e-20
					FBLN2	0.629708	1.41239e-20
					GPR183	0.648067	1.41594e-20
					FAM217B	-0.695627	1.41616e-20
					BOD1	-0.328641	1.49697e-20
					TIMM44	-0.300281	1.60359e-20
					ADAP2	0.394229	1.65615e-20
					CLIC2	0.659651	1.66996e-20
					BEX4	0.915697	1.8782e-20
					FAM110B	0.329625	1.93953e-20
					PSTPIP1	0.328881	1.95312e-20
					CCL2	0.963539	2.00152e-20
					CPNE8	0.78808	2.0295e-20
					HSPB7	0.600893	2.03618e-20
					SS18L1	-0.545338	2.10717e-20
					GFPT2	0.749378	2.20841e-20
					RAD1	-0.387626	2.2784e-20
					RBPMS2	0.566809	2.30855e-20
					CD33	0.317102	2.33285e-20
					SASH3	0.552115	2.33758e-20
					PLP1	0.541732	2.34165e-20
					RPL14	-0.257401	2.34925e-20
					C1QC	0.837987	2.3795e-20
					CCBE1	0.476675	2.49172e-20
					MRPS15	-0.384939	2.51338e-20
					DNPEP	-0.329282	2.5426e-20
					RBM19	-0.33832	2.57794e-20
					MPDZ	0.450367	2.66025e-20
					FGL2	0.825327	2.66201e-20
					PPP3CB	0.364292	2.72432e-20
					NONO	-0.312979	2.72432e-20
					KGFLP2	0.323256	2.74203e-20
					NAT9	-0.311982	2.75675e-20
					PABPC1 /// RLIM	-0.323401	2.80992e-20
					CCL13	0.700929	2.85605e-20
					PLCD1	0.37781	2.85685e-20
					XPNPEP3	-0.361789	2.88448e-20
					MRC1	1.0296	2.99359e-20
					KHK	-0.32337	2.99535e-20
					CHST15	0.755877	2.99789e-20
					MRPS24 /// URGCP-MRPS24	-0.300491	3.03771e-20
					PTRF	0.613745	3.11984e-20
					MARS /// MIR6758	-0.345917	3.12e-20
					BUD13	-0.304503	3.3128e-20
					DDX27	-0.444896	3.36755e-20
					ARID3A	-0.698885	3.47432e-20
					CITED2	0.63005	3.55331e-20
					VCAM1	0.801441	3.59171e-20
					MPHOSPH10	-0.328676	3.59886e-20
					ZNF677	0.368838	3.71125e-20
					ZNF786	-0.30252	3.79342e-20
					HSD17B6	0.806381	3.79918e-20
					DROSHA	-0.333112	3.81785e-20
					CLEC10A	0.525799	3.89965e-20
					GNPDA1	-0.403716	4.03343e-20
					RP11-54K16.2	-0.286753	4.03729e-20
					MST4	-0.628751	4.16572e-20
					LILRB3	0.321833	4.19414e-20
					WDR45B	-0.300698	4.58057e-20
					ALYREF	-0.667668	4.60348e-20
					AAR2	-0.350222	4.75015e-20
					CTPS2	-0.414277	5.079e-20
					HNF1A	-0.268022	5.32344e-20
					PPAPDC3	0.269351	5.49708e-20
					BCCIP	-0.349541	5.73407e-20
					FITM2	-0.623476	5.79659e-20
					THEMIS2	0.531289	5.82158e-20
					MRPL38	-0.38544	6.04923e-20
					GADD45B	0.656435	6.12618e-20
					CLEC14A	0.327077	6.15965e-20
					PFDN2	-0.318805	6.19869e-20
					LDB2	0.594661	6.22852e-20
					OGN	0.883981	6.27698e-20
					MIR143HG /// MIR145	0.655736	6.467e-20
					CXCR4	0.840805	6.5584e-20
					CASC5	-0.373794	6.62362e-20
					DIS3L2	-0.226173	6.82666e-20
					FRMD6	0.870473	7.25822e-20
					CIAO1	-0.288856	7.35957e-20
					ZBTB4	0.421634	7.38414e-20
					AC004941.5	-0.27943	7.46389e-20
					TLE4	0.546277	7.49718e-20
					RTN1	0.743259	7.51323e-20
					PRKCH	0.272293	7.52128e-20
					STX12	0.342648	7.60908e-20
					GAS7	0.518245	7.81572e-20
					POLR2I	-0.335156	7.94575e-20
					PARVG	0.36912	7.97534e-20
					DZIP1	0.338268	7.97534e-20
					WDR34	-0.491589	8.0412e-20
					RBM33	-0.466299	8.08624e-20
					GEMIN4	-0.469631	8.10353e-20
					HSPBP1	-0.344461	8.21778e-20
					TALDO1	-0.278088	8.35105e-20
					LIG3	-0.425297	8.64329e-20
					HOXB2	0.620411	8.70487e-20
					SERTAD4-AS1	0.429063	8.84725e-20
					ACD	-0.508237	9.01502e-20
					SERINC1	0.439891	9.02232e-20
					MGC24103	0.587898	9.78275e-20
					FGFR2	0.940332	9.78275e-20
					UBE2NL	-0.200334	1.05426e-19
					RAB15	-0.550775	1.0761e-19
					USP1	-0.554258	1.07908e-19
					MFNG	0.299912	1.08966e-19
					C10orf54	0.338347	1.10709e-19
					SEC31A	0.325498	1.13255e-19
					AEBP2	-0.40539	1.18146e-19
					MIR143HG	0.870492	1.21928e-19
					ZNF485	-0.238772	1.24028e-19
					NAA16	-0.422161	1.24028e-19
					SCML1	-0.765677	1.24626e-19
					TRIT1	-0.409145	1.25043e-19
					LINC00921 /// ZNF263	-0.29154	1.29002e-19
					DHX15	-0.261893	1.31113e-19
					TOMM70A	-0.372985	1.39427e-19
					GLA	-0.429749	1.39995e-19
					MRPS12	-0.369238	1.41142e-19
					C9orf114	-0.33827	1.42352e-19
					ZDHHC6	-0.294351	1.45351e-19
					LHFP	0.733634	1.45904e-19
					TLR7	0.447338	1.45988e-19
					CHRDL1	1.09298	1.6526e-19
					TBC1D16	-0.355077	1.74122e-19
					MT1HL1	0.747926	1.74984e-19
					BMS1	-0.287528	1.75317e-19
					ADAMTS1	0.824835	1.75317e-19
					FAM49A	0.486719	1.81246e-19
					RNASEL	0.274412	1.82802e-19
					ZNF521	0.637977	1.93084e-19
					HLA-DRB1 /// HLA-DRB1	0.724021	1.93095e-19
					MEIS2	0.971452	1.94598e-19
					PPA1	-0.327925	2.00557e-19
					CAV1	0.747363	2.00922e-19
					CNOT1	-0.459344	2.02869e-19
					POLE3	-0.401524	2.12873e-19
					PLXDC2	0.630689	2.16443e-19
					FAM65B	0.349597	2.1781e-19
					LOC441461	0.279496	2.1966e-19
					SSBP2	0.221631	2.2199e-19
					PIK3CD	0.479406	2.24385e-19
					FGD2	0.295559	2.25846e-19
					FAM214A	0.535674	2.31247e-19
					MS4A4A	0.803639	2.37373e-19
					SMARCC1	-0.387042	2.38047e-19
					CTSD	0.462596	2.39797e-19
					CPNE5	0.485073	2.43408e-19
					POLR2G	-0.307649	2.43958e-19
					KCTD12	0.808811	2.44432e-19
					UBP1	-0.296279	2.46201e-19
					LILRB1	0.375603	2.48296e-19
					MT1M	1.38832	2.54006e-19
					ZSCAN25	-0.30254	2.61389e-19
					DNAJB4	0.647163	2.62301e-19
					FAF1	-0.259928	2.67781e-19
					ADHFE1	0.257572	2.73798e-19
					SUPV3L1	-0.356023	2.74259e-19
					SLIT3	0.304481	2.75439e-19
					CTNNBL1	-0.418432	2.77467e-19
					NME1-NME2 /// NME2	-0.313591	2.77467e-19
					ALG1 /// NAGPA-AS1	-0.379467	2.89644e-19
					CFL2	0.785337	2.93792e-19
					AKT3	0.643777	2.97127e-19
					ZDHHC23	-0.526157	3.04656e-19
					PALM	0.303609	3.0824e-19
					MOB3A	0.384347	3.09051e-19
					SUPT16H	-0.343428	3.11903e-19
					ANO5	0.516238	3.11903e-19
					BID	-0.431805	3.21543e-19
					OCEL1	0.317484	3.28721e-19
					RNF150	0.503827	3.30717e-19
					BCHE	0.909377	3.37617e-19
					ADCY4	0.28463	3.39658e-19
					SCML2	-0.3957	3.4893e-19
					STOX1	-0.323441	3.53925e-19
					DHCR7	-0.54705	3.57399e-19
					KAT2B	0.670393	3.62133e-19
					HAUS8	-0.287473	3.63541e-19
					ZNF445	-0.260379	3.67068e-19
					TNFAIP8L2	0.32469	3.68844e-19
					GIMAP6	0.704556	3.73454e-19
					FGF7 /// KGFLP1 /// KGFLP2	0.731164	3.79246e-19
					CECR1	0.767016	3.80645e-19
					TMEM220	0.716833	3.81792e-19
					TMEM161A	-0.274794	3.84458e-19
					RASGRP2	0.250818	3.91544e-19
					INTS8	-0.415529	3.94626e-19
					RASSF4	0.238346	3.94626e-19
					MIR17 /// MIR17HG /// MIR18A /// MIR19A /// MIR19B1 /// MIR20A /// MIR92A1	-0.742418	4.08213e-19
					CD163	0.964156	4.11895e-19
					KLHDC4 /// LOC100129637	-0.392539	4.14117e-19
					XRCC6	-0.250217	4.16679e-19
					EWSR1	-0.256846	4.4608e-19
					CPOX	-0.381531	4.58535e-19
					ACTA2	0.757516	4.62081e-19
					MMRN2	0.452659	4.65025e-19
					GCN1L1	-0.320805	4.73413e-19
					CYYR1	0.505993	4.7857e-19
					PSME4	-0.321498	4.85648e-19
					HEG1	0.431183	4.98398e-19
					ADAT2	-0.495524	5.00422e-19
					SCN9A	0.227855	5.00457e-19
					LPCAT3 /// U47924.30	-0.266853	5.24537e-19
					HLA-DQA1 /// HLA-DQA2 /// LOC100509457	1.08233	5.27757e-19
					UPF3B	-0.553628	5.40743e-19
					TARS	-0.336075	5.51589e-19
					VIP	1.05075	5.73545e-19
					LRRN4CL	0.500397	5.93611e-19
					NAGK	0.336711	5.93661e-19
					MRPS2	-0.413238	5.99785e-19
					WDR18	-0.393195	6.00916e-19
					FANCE	-0.319896	6.3394e-19
					MDC1	-0.30128	6.35386e-19
					COPS6	-0.306051	6.61871e-19
					ANP32B	-0.24563	6.75736e-19
					PNMA1	0.675337	6.79135e-19
					C10orf35	-0.305529	6.90661e-19
					BIN2	0.345515	7.03055e-19
					TUFM	-0.315793	7.12358e-19
					MRPL47	-0.334921	7.13168e-19
					CEP85L	0.480417	7.22086e-19
					MEN1	-0.352801	7.2907e-19
					NPM1	-0.238601	7.31929e-19
					ZBTB20	0.576262	7.51171e-19
					ATAD3A /// ATAD3B	-0.393931	7.55734e-19
					NUPL2	-0.32018	7.61766e-19
					LRRC20	-0.295776	7.83562e-19
					DPYSL3	0.89637	7.88771e-19
					TSSC1	-0.313548	8.0174e-19
					RRN3	-0.35069	8.14281e-19
					CTSL	0.579407	8.25705e-19
					AK6 /// TAF9	-0.361748	8.85695e-19
					BRI3BP /// THRIL	-0.507503	9.01486e-19
					SFMBT2	0.430736	9.05058e-19
					L2HGDH	-0.321495	9.06758e-19
					GPR108 /// MIR6791	0.275264	9.2282e-19
					PABPC3	-0.26283	9.38456e-19
					MPPE1	0.257492	9.6901e-19
					PDGFRL	0.753812	9.70769e-19
					HSPA9	-0.389647	9.72109e-19
					FBLN1	0.700186	9.80826e-19
					CTGF	0.74752	9.8479e-19
					PRR7	-0.433555	9.95675e-19
					EXOSC3	-0.33538	1.00978e-18
					HCST	0.385116	1.011e-18
					PTCD2	-0.429447	1.01491e-18
					CCL21	0.813499	1.01849e-18
					CYTIP	0.783985	1.01924e-18
					MCAT	-0.380247	1.02972e-18
					ERH	-0.248029	1.03081e-18
					RPL23A	-0.120007	1.03333e-18
					GET4 /// SUN1	-0.371346	1.05335e-18
					SLMO2	-0.537986	1.05794e-18
					TMEM45A	0.973827	1.06541e-18
					GCFC2	-0.436786	1.06982e-18
					MRPL16	-0.354552	1.08732e-18
					CLP1	-0.290598	1.09896e-18
					MILR1	0.265184	1.10109e-18
					NCF1 /// NCF1B /// NCF1C	0.506621	1.14323e-18
					GSK3B	-0.342972	1.17424e-18
					SHE	0.414095	1.19446e-18
					E2F4	-0.234206	1.19505e-18
					RP11-350F4.2	-0.619115	1.23105e-18
					PRPS1	-0.544194	1.26658e-18
					P2RX4	0.442444	1.27093e-18
					DHX57	-0.275811	1.28074e-18
					EXOSC4	-0.454181	1.28727e-18
					B2M	0.16503	1.29958e-18
					MIR3934 /// UQCC2	-0.405003	1.31604e-18
					ZNF667	0.166414	1.31988e-18
					C1QB	0.857992	1.3228e-18
					AHCTF1	-0.390987	1.33171e-18
					GLMN	-0.411442	1.35277e-18
					C7orf50	-0.406447	1.36671e-18
					EBF1	0.664607	1.38176e-18
					ARMC2-AS1 /// ATP5J2	-0.272772	1.38753e-18
					AHSA1	-0.320879	1.4342e-18
					CD69	0.837564	1.43958e-18
					TCFL5	-0.70129	1.44757e-18
					NXT1	-0.457866	1.47439e-18
					DPY30	-0.286578	1.50012e-18
					CNNM3	-0.327177	1.50148e-18
					CD300A	0.532843	1.54531e-18
					CCNB1IP1	-0.408259	1.55652e-18
					C2orf15	-0.286347	1.56497e-18
					NOL6	-0.336682	1.56497e-18
					WDR92	-0.35532	1.58607e-18
					ANTXR2	0.267893	1.68847e-18
					CLIP4	0.234876	1.69354e-18
					TRMT11	-0.486394	1.71935e-18
					DOK5	0.279615	1.73501e-18
					LANCL2	-0.348985	1.79983e-18
					NCBP2	-0.352669	1.92015e-18
					MGC70870	-0.297888	2.0288e-18
					CBLL1	-0.379767	2.0288e-18
					PWP1	-0.313504	2.09697e-18
					VSIG2	1.15934	2.1076e-18
					PSME3	-0.38275	2.1099e-18
					AXL	0.290119	2.21522e-18
					CD300LF	0.524895	2.23783e-18
					XPO6	-0.2494	2.28177e-18
					RNF43	-0.826302	2.30118e-18
					SMG8	-0.318908	2.34847e-18
					TMEM127	0.268959	2.36867e-18
					PRICKLE2	0.587518	2.38471e-18
					CHCHD4	-0.312287	2.4035e-18
					TCF21	0.631335	2.42207e-18
					CUL4A	-0.361432	2.43179e-18
					PARP1	-0.329092	2.44383e-18
					P2RX5-TAX1BP3 /// TAX1BP3	0.372574	2.48339e-18
					RPS19	-0.196838	2.491e-18
					SLC12A2	-0.722993	2.49412e-18
					XRCC5	-0.235176	2.51944e-18
					KANSL2	-0.271959	2.59097e-18
					MRPL51	-0.232551	2.67637e-18
					PINLYP	0.21766	2.70394e-18
					YRDC	-0.334945	2.71092e-18
					APOE	0.93988	2.78409e-18
					AGO2	-0.570136	2.84077e-18
					MS4A2	0.265877	2.88141e-18
					STAU1	-0.311915	2.90381e-18
					TMEM47	0.666506	2.90974e-18
					CCDC8	0.325209	2.96466e-18
					ANKRD27	-0.355034	2.9759e-18
					DDX11	-0.362724	3.01134e-18
					WWTR1	0.500098	3.03918e-18
					MYL6	0.225223	3.14067e-18
					PTPMT1	-0.372082	3.406e-18
					TRIAP1	-0.324575	3.40753e-18
					SPSB1	0.40319	3.42915e-18
					TTC17	-0.450123	3.46915e-18
					SCARB1	-0.482942	3.47235e-18
					TRIM24	-0.310926	3.50573e-18
					SNCA	0.552023	3.50838e-18
					ZNHIT3	-0.368876	3.64856e-18
					TBC1D10C	0.344189	3.65158e-18
					MRPL50	-0.474481	3.79179e-18
					PM20D2	-0.86193	3.80375e-18
					GART	-0.415092	3.89557e-18
					TRA2B	-0.305147	4.06918e-18
					LILRB5	0.292057	4.12966e-18
					PLEKHG4	-0.52163	4.23132e-18
					GBP2	0.593411	4.40234e-18
					HLA-E	0.435358	4.62201e-18
					ZNF607	-0.261651	4.73242e-18
					MFSD1	0.373846	4.75959e-18
					LSM6	-0.324628	4.83491e-18
					FCN1	0.522179	4.83495e-18
					NDUFAB1	-0.259413	4.85597e-18
					RALY	-0.36668	5.00745e-18
					PSMD3	-0.330086	5.17123e-18
					VMA21	-0.423173	5.17123e-18
					TONSL	-0.343543	5.24889e-18
					TM6SF1	0.534524	5.25264e-18
					TMTC4	-0.531388	5.61838e-18
					MT1H	0.82647	5.61903e-18
					WBP11	-0.34432	5.72717e-18
					ATP8B2	0.232092	5.73118e-18
					STRA13	-0.350634	5.75573e-18
					SRM	-0.438769	5.77312e-18
					LAMA2	0.503521	5.83923e-18
					RPUSD2	-0.323769	5.94352e-18
					KDM1A	-0.355934	5.94592e-18
					DDX1	-0.242397	6.06007e-18
					P2RX1	0.229041	6.24035e-18
					PPP1R3C	0.721269	6.2799e-18
					ARL6IP1	-0.307225	6.28861e-18
					PAQR4	-0.392198	6.31323e-18
					SMN1 /// SMN2	-0.480041	6.43853e-18
					CD320	-0.438377	6.51345e-18
					OXSM	-0.336619	6.59241e-18
					LSM4	-0.36358	6.62724e-18
					LOC285902 /// ZNF273	-0.332191	6.64702e-18
					MATR3	-0.648352	6.66156e-18
					MAPRE2	0.409456	6.7389e-18
					GPS1	-0.31162	6.78766e-18
					ZC3H18	-0.324773	6.87989e-18
					WRAP73	-0.319852	6.8978e-18
					RRAS	0.414304	6.94141e-18
					ZNF25	0.36936	6.97718e-18
					FYB	0.429465	7.00309e-18
					LINC00341 /// SYNE3	0.540795	7.04371e-18
					MGME1	-0.481504	7.10952e-18
					CTSV	-0.674062	7.12399e-18
					PHF14	-0.3869	7.30736e-18
					DBI	-0.292639	7.40482e-18
					GLIS3	0.669492	7.44619e-18
					SLC2A8	-0.40464	7.44619e-18
					HMGA1	-0.517485	7.51038e-18
					EIF3C /// EIF3CL	-0.354816	7.69547e-18
					IPO7	-0.37188	7.8957e-18
					NSUN5	-0.307557	7.92555e-18
					SV2B	0.247558	7.93415e-18
					SFXN2	-0.410944	8.16946e-18
					RPL19	-0.205472	8.3202e-18
					TP53INP2	0.609418	8.33584e-18
					LDLRAD3	-0.70568	8.39271e-18
					ITGB2	0.722846	8.63476e-18
					MMAB	-0.383453	9.1275e-18
					CDC25B	-0.618338	9.41561e-18
					DOCK8	0.737429	9.48033e-18
					HPDL	-0.741731	9.48868e-18
					C8orf88	0.575602	9.53826e-18
					NFS1	-0.491336	9.65218e-18
					BCL6	0.604346	1.00085e-17
					TCAIM	-0.562716	1.01556e-17
					MORC2	-0.328908	1.03317e-17
					DACT1	0.799348	1.04315e-17
					SPIB	0.497794	1.06006e-17
					CD79A	0.441153	1.0945e-17
					ZBTB2	-0.315255	1.0945e-17
					TARBP2	-0.308068	1.09503e-17
					MGAT1	0.281875	1.11337e-17
					SELL	0.75933	1.12448e-17
					POU2F1	-0.268342	1.13689e-17
					COL8A2	0.673222	1.15103e-17
					USP24	-0.362305	1.15349e-17
					TEK	0.458271	1.15349e-17
					DNM1L	-0.360549	1.15349e-17
					CDC42EP3	0.536828	1.1756e-17
					ASB9	-0.728105	1.21316e-17
					HNRNPU	-0.292793	1.21635e-17
					LOC100507165	0.258097	1.27455e-17
					MSH5 /// MSH5-SAPCD1 /// SAPCD1	-0.471598	1.29832e-17
					CD19	0.374566	1.31841e-17
					PEX5	-0.292723	1.32818e-17
					LMBR1	-0.406325	1.40225e-17
					CABLES2	-0.480627	1.4265e-17
					MYOT	0.394594	1.43085e-17
					FST	0.425133	1.44086e-17
					WDR74	-0.265125	1.4438e-17
					NTHL1	-0.38919	1.45857e-17
					SNRPB	-0.478299	1.46551e-17
					RNF144B	0.595428	1.4937e-17
					ORC3	-0.391896	1.50079e-17
					CTBP2	-0.346742	1.52188e-17
					HNRNPA1P3 /// HNRNPA1P3	-0.236797	1.55803e-17
					ARL6IP6	-0.343147	1.58235e-17
					PKP4	-0.38959	1.59422e-17
					BHMT2	0.378516	1.62584e-17
					CREBRF	0.290328	1.62806e-17
					COA6	-0.296259	1.66086e-17
					SLC22A17	0.285423	1.68383e-17
					RSPO3	0.92078	1.73106e-17
					TIMM10	-0.429232	1.76516e-17
					TGFB1I1	0.705838	1.77765e-17
					SP6	-0.447333	1.80465e-17
					PDCL3 /// PDCL3P4	-0.304547	1.80578e-17
					C11orf48 /// LOC102288414	-0.288214	1.85122e-17
					ACP2	0.31106	1.87245e-17
					RCL1	-0.255886	1.88366e-17
					TMEM68	-0.54336	2.00131e-17
					JAKMIP2	0.244917	2.02819e-17
					TUBB2A	0.605963	2.04829e-17
					NDEL1	0.299923	2.13394e-17
					KIAA1958	-0.301435	2.14338e-17
					AL928768.3 /// Ig alpha 1-[alpha]2m /// IGH	0.722075	2.16654e-17
					MCF2L-AS1	-0.506093	2.16654e-17
					RPL18	-0.174574	2.20603e-17
					BACH2	0.354695	2.20603e-17
					C2orf44	-0.248999	2.20603e-17
					STRBP	-0.374814	2.26942e-17
					LAMP5	0.483547	2.29103e-17
					OPTN	0.528944	2.3049e-17
					MRPL51 /// SPTLC1	-0.250508	2.31246e-17
					KBTBD6	-0.431766	2.31246e-17
					S1PR1	0.352477	2.31375e-17
					POP5	-0.330187	2.35679e-17
					HLA-DRB1 /// HLA-DRB4 /// LOC100996809	0.741351	2.43037e-17
					FYN	0.635023	2.49903e-17
					RRP7A	-0.449258	2.49903e-17
					MLST8	-0.302526	2.51052e-17
					EMD	-0.322323	2.5469e-17
					RBP5	0.362391	2.65351e-17
					HLA-DMB	0.674828	2.66057e-17
					ANGEL1	-0.28281	2.66319e-17
					RCCD1	-0.306061	2.74292e-17
					DRG1	-0.262032	2.75538e-17
					HILPDA	-0.720377	2.84771e-17
					RAD51	-0.18234	2.92439e-17
					HLA-DQB1 /// HLA-DRB1 /// HLA-DRB4 /// HLA-DRB5 /// LOC100996809 /// LOC101060835	0.788859	2.96584e-17
					EMILIN1	0.669923	3.01704e-17
					TUBA1C	-0.185736	3.02693e-17
					MTMR1	-0.318184	3.12436e-17
					TSC22D3	0.337564	3.189e-17
					CTSF	0.355703	3.189e-17
					COASY	-0.325032	3.31685e-17
					PXN-AS1	-0.338441	3.31945e-17
					MRPL30	-0.35047	3.33867e-17
					AK022793 /// BC043213 /// CTB-175P5.4	-0.409627	3.37948e-17
					MAPK10	0.241818	3.43644e-17
					TARBP1	-0.410098	3.50229e-17
					COPS7B	-0.264541	3.5224e-17
					DLGAP1-AS2	-0.578143	3.53926e-17
					PSMA5	-0.296823	3.54729e-17
					ZNF300P1	0.168939	3.58298e-17
					SLC37A2	0.407235	3.68169e-17
					ALKBH2	-0.384099	3.71607e-17
					PDZRN4	0.606646	3.80206e-17
					NPEPL1	-0.481699	3.88847e-17
					CA7	0.504831	4.10854e-17
					CDO1	0.523459	4.16905e-17
					INPP5K	0.273338	4.36229e-17
					DNAJB5	0.337862	4.39425e-17
					PPP1R18	0.532343	4.51155e-17
					FAM20C	0.587608	4.53699e-17
					RABAC1	0.402326	4.67085e-17
					FASTKD3	-0.368712	4.69082e-17
					SLC29A2	-0.276725	4.77408e-17
					TMEM59	0.347116	4.98955e-17
					PPIC	0.489022	5.09329e-17
					ANXA2 /// NHP2L1	-0.287262	5.09479e-17
					RTN4IP1	-0.429017	5.10246e-17
					GATC	-0.497742	5.10768e-17
					DDX11 /// DDX12P /// LOC642846	-0.387798	5.12313e-17
					MMRN1	0.481662	5.14451e-17
					DNM3OS	0.536812	5.15323e-17
					PSMB1	-0.233813	5.16279e-17
					RPLP0	-0.120997	5.18491e-17
					CDKN1A	0.495016	5.33804e-17
					ABCF2	-0.328382	5.33824e-17
					ATP8B4	0.312125	5.34222e-17
					GSTM5	0.219127	5.34913e-17
					SELM	0.68262	5.40654e-17
					SND1	-0.283918	5.4192e-17
					UGCG	0.436437	5.43875e-17
					METTL8	-0.396377	5.44825e-17
					MAP1B	0.700599	5.52777e-17
					RNASE6	0.588327	5.54836e-17
					MRPS34	-0.303453	5.65814e-17
					SLC25A13	-0.415461	5.67075e-17
					IMPDH1	-0.30959	5.77408e-17
					MAN2B1	0.344509	5.97734e-17
					TRIM22	0.814731	5.97841e-17
					LYL1	0.218912	5.97841e-17
					EEF1B2 /// SNORA41	-0.258737	6.02926e-17
					TNPO3	-0.259538	6.03279e-17
					LY6G6D /// LY6G6F	-1.5144	6.13555e-17
					RP4-680D5.8	-0.460706	6.18194e-17
					RPL26L1	-0.301758	6.21332e-17
					LOC100996668 /// ZEB1	0.645752	6.36789e-17
					DAPK1-IT1 /// DAPK1-IT1	0.359996	6.60586e-17
					TSEN34	-0.253758	6.6541e-17
					RGL1	0.438301	6.71703e-17
					GPR19	-0.31939	6.80619e-17
					RHOJ	0.510978	6.91829e-17
					PSMC3IP	-0.204249	7.1615e-17
					CTD-2124B8.2	-0.395659	7.23602e-17
					ZNF443	-0.384876	7.23815e-17
					PDZD8	-0.588658	7.27014e-17
					ABCC1	-0.421659	7.28708e-17
					GTF2E1	-0.265908	7.32994e-17
					MON1A	-0.251506	7.32994e-17
					ACBD6	-0.329348	7.34447e-17
					FOXRED1	-0.328687	7.46246e-17
					C16orf89	0.330501	7.54757e-17
					ACTL10	-0.395509	7.54757e-17
					FLJ45482	-0.38803	7.56949e-17
					CLEC1A	0.279159	7.70854e-17
					ITPR1	0.512567	7.78702e-17
					SNHG3 /// SNORA73A	-0.467079	7.80156e-17
					HLA-DQB1 /// HLA-DRB1 /// HLA-DRB3 /// HLA-DRB4 /// LOC100996809 /// LOC101060835	0.810824	7.86218e-17
					CTSLP8	0.388185	7.93135e-17
					FAM122B	-0.515937	8.05861e-17
					THSD7A	0.364537	8.19569e-17
					FLII	0.278822	8.26686e-17
					CA5B /// CA5BP1	-0.328224	8.32418e-17
					GNG7	0.305617	8.32514e-17
					HES6	-0.607758	8.34971e-17
					MAP3K12	0.237667	8.39815e-17
					RBMX2	-0.315798	8.41521e-17
					ESR1	0.32677	8.43766e-17
					IMP4	-0.31959	8.4483e-17
					RALY-AS1	-0.415279	8.6377e-17
					TADA2A	-0.212472	8.79256e-17
					CRIP2	0.549479	8.84912e-17
					MRS2	-0.377809	8.85425e-17
					SURF6	-0.302291	9.0023e-17
					NRF1	-0.266746	9.0587e-17
					IL6R	0.608832	9.14904e-17
					NUDT5	-0.523784	9.36155e-17
					AMPD1	0.383834	9.5406e-17
					AEBP1	0.846371	9.68509e-17
					TMOD1	0.319469	9.75354e-17
					CMA1	0.300181	9.82996e-17
					GINS4	-0.253947	1.06768e-16
					GPN1	-0.240675	1.11736e-16
					KPNB1	-0.325638	1.11894e-16
					BICD1	-0.635408	1.1218e-16
					TCHP	-0.278849	1.1708e-16
					ADD1	0.258948	1.18053e-16
					IL10RB	0.406364	1.18154e-16
					AASDHPPT	-0.418297	1.20323e-16
					NTMT1	-0.354438	1.22077e-16
					MRPL42	-0.376637	1.22141e-16
					LRRC25	0.279831	1.23309e-16
					ZNHIT6	-0.383681	1.25207e-16
					RNF180	0.185157	1.25607e-16
					TRPS1	0.536163	1.26374e-16
					FOXK2	-0.325703	1.2668e-16
					SNORA21	-0.420125	1.30742e-16
					KCTD1	0.585179	1.31181e-16
					PRRT3-AS1	-0.521749	1.32042e-16
					TLR5	0.34414	1.34906e-16
					COL14A1	0.808979	1.37326e-16
					CENPJ	-0.350052	1.47406e-16
					MED26	-0.22474	1.49112e-16
					PRPF38A	-0.281024	1.50691e-16
					RASSF5	0.429238	1.5096e-16
					CEP57	-0.46002	1.54742e-16
					PDGFD	0.670977	1.56152e-16
					GUCA2B	0.97655	1.5681e-16
					TNFRSF1A	0.310495	1.58263e-16
					SCIN	1.13979	1.5921e-16
					RPL23A /// SNORD42A	-0.100705	1.62358e-16
					TRUB2	-0.299017	1.63212e-16
					SLC52A2	-0.375181	1.63308e-16
					KIF2A	-0.348883	1.66508e-16
					FAM133B /// FAM133DP	-0.334253	1.69561e-16
					MOCS3	-0.479733	1.73688e-16
					NPY1R	0.769574	1.77973e-16
					MRVI1	0.539163	1.7799e-16
					MIR6516 /// SCARNA16 /// SNHG20	-0.334179	1.80898e-16
					SLCO4A1	-0.707683	1.81629e-16
					ARHGAP24	0.227225	1.82844e-16
					TIGD2	-0.463738	1.86135e-16
					MTFR1	-0.455118	1.87098e-16
					SH3BGRL	0.508139	1.88109e-16
					RHOH	0.523078	1.8849e-16
					BCAP31	-0.309696	1.90686e-16
					DDX23	-0.216753	1.95184e-16
					PABPC1L	-0.760171	1.95303e-16
					QKI	0.360856	1.98907e-16
					NUP88	-0.386592	2.02168e-16
					PSMB3	-0.307724	2.02943e-16
					RAD51C	-0.344849	2.03777e-16
					NUP62	-0.305639	2.04677e-16
					RNF112	0.1954	2.051e-16
					CCL23	0.35079	2.05414e-16
					CBFB	-0.397561	2.11587e-16
					CCR2	0.563139	2.16403e-16
					PARG	-0.260833	2.18462e-16
					UROS	-0.425246	2.25684e-16
					LARP4B	-0.298228	2.25885e-16
					P2RY8	0.387142	2.28349e-16
					EHMT2	-0.380552	2.28488e-16
					HNRNPA1 /// HNRNPA1L2 /// HNRNPA1P10 /// HNRNPA1P33	-0.147135	2.2852e-16
					MRPS28	-0.422307	2.2873e-16
					HDAC8	-0.292425	2.29059e-16
					LILRB2	0.39351	2.29834e-16
					CAV2	0.669021	2.32023e-16
					AKAP13	0.318318	2.32404e-16
					C2orf49	-0.302608	2.3704e-16
					SIGLEC1	0.483021	2.42771e-16
					YWHAQ	-0.223273	2.52099e-16
					GREM2	0.557619	2.5618e-16
					LRRC4C	0.258348	2.593e-16
					GPR143	-0.798695	2.65964e-16
					RP5-882O7.1	-0.0846343	2.69411e-16
					HLA-DRA	0.88314	2.69411e-16
					SLC16A2	0.473457	2.70224e-16
					DGKZ	-0.375214	2.72492e-16
					TBC1D4	-0.486559	2.78238e-16
					UCKL1	-0.393954	2.78312e-16
					TMEM160	-0.382103	2.84838e-16
					CCDC138	-0.206191	2.85692e-16
					RP3-406P24.1	-0.272975	2.93561e-16
					MT1E	0.983991	2.93561e-16
					P2RY13	0.567667	2.97792e-16
					GAPT	0.307997	2.99742e-16
					LYRM4	-0.391768	3.07085e-16
					SYT11	0.382685	3.10452e-16
					MYL9	0.949389	3.15418e-16
					FAM84B	-0.547839	3.16059e-16
					CASQ2	0.590526	3.20415e-16
					PHGDH	-0.722793	3.26779e-16
					GPR34	0.760869	3.27073e-16
					PTPRCAP	0.400953	3.27073e-16
					RAD51D	-0.292269	3.31263e-16
					APOLD1 /// DDX47	-0.278853	3.32741e-16
					ACYP1	-0.428245	3.35796e-16
					ZMIZ1	0.351849	3.35796e-16
					PPP2R3A	0.412419	3.42221e-16
[truncated: 21,520 more rows]

## Sheet: 44 Genes-Group1 vs Group2 up 
Gene_symbol
ADH1B
ANK2
AOC3
APOD
AQP8
ASPN
C1S
C3
C7
CCL19
CFH
CHRDL1
CLMP
CNN1
COLEC12
DCN
DES
EFEMP1
EVI2B
F13A1
FABP4
FBXO32
FNDC1
GPX3
GREM1
IGF1
LMOD1
MAB21L2
MAFB
MFAP5
MGP
MRC1
PLN
PTGIS
RGS2
SCG2
SFRP2
SLIT2
SPARCL1
SPOCK1
SRPX
SYNPO2
TAGLN
VIP

## Sheet: Univariate Cox results
	TCGA-COAD PFS						GSE39582 RFS
Gene_symbol	p.value	HR	Low 95%CI	High 95%CI		Gene_symbol	p.value	HR	Low 95%CI	High 95%CI
ADH1B	0.98	0.990099	0.653595	1.51515		ADH1B	0.49	1.11111	0.826446	1.49254
ANK2	0.042	1.53846	1.0101	2.38095		ANK2	0.23	1.19048	0.892857	1.6129
AOC3	0.0015	2	1.2987	3.125		AOC3	0.097	1.28205	0.952381	1.72414
APOD	0.034	1.5873	1.03093	2.43902		APOD	0.0024	1.5873	1.17647	2.12766
AQP8	0.015	0.588235	0.381679	0.909091		AQP8	0.18	0.813008	0.609756	1.0989
ASPN	0.00013	2.32558	1.49254	3.7037		ASPN	0.01	1.47059	1.0989	2
C1S	0.072	1.47059	0.961538	2.27273		C1S	0.091	1.28205	0.961538	1.72414
C3	0.033	1.5873	1.03093	2.43902		C3	0.73	1.05263	0.78125	1.40845
C7	0.19	1.33333	0.869565	2.04082		C7	0.52	1.0989	0.819672	1.47059
CCL19	0.99	0.512821	0.653595			CCL19	0.91	0.990099	0.735294	1.31579
CFH	0.15	1.36986	0.892857	2.08333		CFH	0.049	1.35135	1	1.81818
CHRDL1	0.11	1.40845	0.925926	2.17391		CHRDL1	0.33	1.16279	0.862069	1.5625
CLMP	0.097	1.42857	0.934579	2.17391		CLMP	0.051	1.33333	1	1.53846
CNN1	0.0002	2.27273	1.44928	3.44828		CNN1	0.037	1.35135	1.02041	1.85185
COLEC12	0.12	1.40845	0.917431	2.12766		COLEC12	0.019	1.42857	1.05263	1.92308
DCN	0.12	1.40845	0.917431	2.12766		DCN	0.12	1.26582	0.934579	1.69492
DES	0.081	1.44928	0.952381	2.22222		DES	0.31	1.16279	0.869565	1.5625
EFEMP1	0.098	1.42857	0.934579	2.17391		EFEMP1	0.011	1.47059	1.08696	1.96078
EVI2B	0.81	1.05263	0.689655	1.6129		EVI2B	0.86	1.02041	0.763359	1.36986
F13A1	0.25	1.28205	0.840336	1.96078		F13A1	0.62	1.07527	0.806452	1.44928
FABP4	0.016	1.69492	1.0989	2.5641		FABP4	0.68	1.06383	0.793651	1.42857
FBXO32	0.032	1.5873	1.04167	2.43902		FBXO32	0.85	1.03093	0.769231	1.38889
FNDC1	0.041	1.5625	1.02041	2.38095		FNDC1	0.028	1.38889	1.03093	1.88679
GPX3	0.0001	2.5641	1.6129	4		GPX3	0.039	1.36986	1.0101	1.81818
GREM1	0.13	1.38889	0.900901	2.12766		GREM1	0.0005	1.69492	1.25	2.27273
IGF1	0.18	1.33333	0.869565	2.04082		IGF1	0.7	0.943396	0.704225	1.26582
LMOD1	0.0056	1.81818	1.19048	2.77778		LMOD1	0.0076	1.49254	1.11111	2
MAB21L2	0.0037	1.88679	1.21951	2.94118		MAB21L2	0.0022	1.5873	1.17647	2.12766
MAFB	0.017	1.66667	1.08696	2.5641		MAFB	0.25	1.19048	0.884956	1.5873
MFAP5	0.018	1.66667	1.08696	2.5641		MFAP5	0.047	1.35135	1	1.81818
MGP	0.098	1.42857	0.934579	2.17391		MGP	0.069	1.31579	0.980392	1.75439
MRC1	0.2	1.31579	0.862069	2		MRC1	0.53	1.0989	0.819672	1.47059
PLN	0.0052	1.85185	1.19048	2.85714		PLN	0.17	1.23457	0.917431	1.63934
PTGIS	0.064	1.49254	0.970874	2.27273		PTGIS	0.41	1.13636	0.847458	1.51515
RGS2	0.012	1.72414	1.1236	2.63158		RGS2	0.38	1.13636	0.847458	1.51515
SCG2	0.015	1.69492	1.0989	2.63158		SCG2	0.00081	1.66667	1.23457	2.22222
SFRP2	0.013	1.72414	1.11111	2.63158		SFRP2	0.17	1.23457	0.917431	1.66667
SLIT2	0.0032	1.88679	1.23457	2.94118		SLIT2	0.011	1.47059	1.08696	1.96078
SPARCL1	0.23	1.2987	0.847458	1.96078		SPARCL1	0.31	1.16279	0.869565	1.5625
SPOCK1	0.054	1.51515	0.990099	2.32558		SPOCK1	0.13	1.25	0.934579	1.69492
SRPX	0.0021	1.96078	1.26582	3.0303		SRPX	0.19	1.21951	0.909091	1.63934
SYNPO2	0.002	1.96078	1.26582	3.0303		SYNPO2	0.13	1.25	0.934579	1.69492
TAGLN	0.0005	2.12766	1.36986	3.33333		TAGLN	0.003	1.5625	1.16279	2.12766
VIP	0.27	1.26582	0.833333	1.92308		VIP	0.034	1.35135	1.02041	1.85185

## Sheet: LC-MS data of target metabolite
Component Name	Mass Info	Retention Time	QC-RSD	QC-1	QC-2	QC-3	Lovo-nP-1	Lovo-nP-2	Lovo-nP-3	Lovo-P-1	Lovo-P-2	Lovo-P-3
alpha-ketoglutarate	145.2 / 101.1	5.56779	0.0152252	460303	469036	455135	437837	327309	307342	553290	454644	470805
Oxaloacetate	131.1 / 87.1	5.95411	0.0476688	252851	232660	233492	338736	294690	250076	759391	306166	268594
Succinate	117.1 / 73.0	6.43902	0.0568124	5679601	6364014	6027592	5338491	4693484	3100351	8168520	5954896	5142833
Phosphoenolpyruvate	167.1 / 79.0	9.05368	0.0445708	11778724	11449186	10786495	15295171	9892074	6164912	1155227	4996825	2737219
L-Malic acid	133.0 / 115.1	6.93638	0.0467482	45670379	43915180	41595103	59849828	38416921	44056483	48708226	39221334	49073253
Lactate	89.2 / 43.0	2.16596	0.023632	31708868	30682404	30296163	33909603	35870513	31949512	19032846	15022243	12897214
cis-Aconitate	173.1 / 85.1	8.50361	0.0479152	19197644	19088464	17599926	26667660	18212548	27602063	12240090	16759125	23157905
GMP	362.1 / 79.1	9.30956	0.11119	1275081	1098211	1030787	800527	838178	844943	686303	767569	695922
NAD	662.1 / 540.0	8.33775	0.0440365	67796603	73646690	72716462	70268099	70592524	66549637	71348671	77376584	70152222
Reduced nicotinamide adenine dinucleotide (NADH)	664.1 / 408.0	6.98749	0.00787827	1650225	1624952	1642196	1561740	772358	840271	2009150	1204054	1876377
NADPH	744.1 / 408.0	9.85175	N/A	N/A	N/A	N/A	N/A	N/A	N/A	N/A	N/A	N/A
NADP	742.1 / 620.0	10.797	0.0714674	19867742	18428952	17225877	14253266	16919054	16060854	16623116	18118212	15384576
ADP	426.0 / 79.0	9.2058	0.00943951	97377746	98565938	96752945	96601049	112810884	86712036	50562365	64338144	68800501
Adenosine monophosphate	346.1 / 79.0	7.94355	0.03018	13565506	13485825	14241859	7565022	10122717	14255224	3977052	7192049	10842507
Cyclic AMP	328.0 / 134.0	2.66151	0.0315429	482705	455443	459561	349777	416176	359992	427457	555086	452423
Isocitrate	191.0 / 73.0	9.18464	0.0846798	9019270	8051181	7663790	9949469	7258013	11057424	4125331	5700430	8342874
Citrate	191.1 / 87.1	10.7744	0.014359	102250550	104896693	104771587	117067122	94796723	129933011	89277119	96424338	120581364
Pyruvate	87.1 / 43.1	1.45096	0.00259475	109878	110099	110445	160773	136796	164521	127467	121319	117495
Fumarate	115.1 / 71.1	5.85605	0.0424336	350362	330717	322780	352622	336685	314375	515187	286067	288348
Adenosine 5'-triphosphate (ATP)	506.0 / 159.0	10.3911	0.0720311	171251570	194936646	194152728	182958330	188845113	201983526	170893366	187315133	169665025
Guanosine 5'-diphosphate (GDP)	442.0 / 79.0	10.5469	0.0178964	19970405	19679785	19270757	17987971	25185913	18585976	11275618	13922999	13345775
Guanosine 5'-triphosphate (GTP)	522.0 / 159.1	11.6291	0.10897	34579794	40470087	42915661	40287735	43757554	43649198	33040215	39917653	35540448
Thiamine pyrophosphate (TPP)	423.0 / 302.0	10.7751	0.254926	6337769	4657090	3864983	2430162	2748271	2565300	1797344	2149805	2047202
Flavin mononucleotide (FMN)	455.1 / 97.0	7.0927	0.0862039	537082	475699	456198	301038	336551	290449	284250	334722	281050
D-Fructose 1,6-bisphosphate	339.1 / 97.0	11.506	0.0670013	45156085	50508719	51110957	37165181	48196384	43473856	41425156	58744705	46206917
Beta-D-Fructose 6-phosphate	259.1 / 97.0	8.93622	0.0328627	5809111	5456552	5540865	5671491	6287211	5493344	7679308	6221213	4613745
3-Phospho-D-glycerate	185.0 / 97.0	9.20498	0.071039	5811125	6496485	5713343	6199502	4844874	2550822	9861556	7079172	3223379
D-Glucose 6-phosphate	259.0 / 97.0	9.69457	0.00648812	67664891	67132129	66800678	51315919	75886852	58079494	27726670	52004090	55844636
Dihydroxyacetone phosphate	169.1 / 97.0	7.98249	0.00424399	2542265	2535821	2556899	3181349	1756869	4316631	13395233	2997708	6502441
Acetyl coenzyme A (Acetyl-CoA)	808.2 / 408.1	7.80454	0.0386533	62722	60037	58081	21157	32900	84643	81687	73665	41556
Succinyl coenzyme A (Succinyl-CoA)	866.1 / 408.1	9.73671	N/A	N/A	N/A	N/A	N/A	N/A	N/A	N/A	N/A	N/A
